# Supplementary material
Source: PubMed Central journal article supplement (PMC5752389)
Supplement: jciinsight-2-96228-s001.pdf [file jciinsight-2-96228-s001.pdf]

## **Supplemental Material**

### **IL-7-dependent STAT1 activation limits homeostatic CD4 T cell expansion**

Cecile Le Saout<sup>1</sup>, Megan A. Luckey<sup>2</sup>, Alejandro V. Villarino<sup>3</sup>, Mindy Smith<sup>1</sup>, Rebecca B. Hasley<sup>1</sup>, Timothy G. Myers<sup>4</sup>, Hiromi Imamichi<sup>1</sup>, Jung-Hyun Park<sup>2</sup>, John J O'Shea<sup>3</sup>, H. Clifford Lane<sup>1</sup> and Marta Catalfamo<sup>1,\*</sup>

<sup>1</sup>CMRS/Laboratory of Immunoregulation, NIAID, NIH, Bethesda, MD, USA.

\*Department of Microbiology and Immunology. Georgetown University School of Medicine. Washington DC, USA.

<sup>2</sup>Experimental Immunology Branch, CCR, NCI, NIH, Bethesda, MD, USA

<sup>3</sup>Lymphocyte Cell Biology Section, NIAMS, NIH, Bethesda, MD, USA

<sup>4</sup>Genomic Technologies Section, Research Technologies Branch, NIAID, NIH, Bethesda, MD, USA

**Figure S1. STAT1 Tg mice exhibit similar T cell counts and differentiation profiles than WT littermates.** (A) Schematic representation of the transgene construct of mouse STAT1 cDNA under the control of the human CD2 enhancer/promoter used to generate transgenic (Tg) mice. (B) Total cellularity in LNs, spleen and thymus from WT (n= 16, black symbols) and STAT1 Tg (n= 16, red symbols) mice. (C) Absolute numbers of CD4 and CD8 T cells were enumerated in the LNs of both groups. (D) Gating strategy and percentages of naïve (Tn: CD44<sup>low</sup> CD62L<sup>high</sup>), central memory (Tcm: CD44<sup>high</sup> CD62L<sup>high</sup>), effector/effector memory (Teff/em: CD44<sup>high</sup> CD62L<sup>low</sup>) on gated CD3<sup>+</sup> CD4<sup>+</sup> and CD8<sup>+</sup> lymphocytes in WT and STAT1 Tg littermates are shown. LN cells from WT and STAT1 Tg mice were analyzed by flow cytometry for expression of (E) IL-7R $\alpha$  and (F) phosphorylated STAT1 after *in vitro* stimulation with rmIFN- $\alpha$ 4 (500 U/ml) or rmIFN- $\gamma$  (10 ng/ml) in CD4 and CD8 T cells. A nonparametric Mann-Whitney test was performed for comparisons between groups. Data from four independent experiments out of four, including an average of 4 mice per group, are presented as box and whisker plots showing the median value bounded by the first and third quartiles in the box, with whiskers extending to the minimum and maximum values.

**Figure S2. IL-7 induces a similar set of STAT1/IFN associated genes in WT and STAT1 Tg T cells.** Sorted WT and STAT1 Tg CD4 (n=5 and n=4 respectively) and CD8 (n=6 and n=5 respectively) naïve T cells were treated and analyzed as described in Figure 3. Venn diagrams illustrate (A) the overlap between WT and STAT1 Tg DEGs in response to IL-7 or IFN- $\gamma$  in CD4 and CD8 Naïve T cells; (B) the overlap between the DEGs in WT cells stimulated with IFN- $\gamma$  (green) and the DEGs in STAT1 Tg (red) T cells stimulated with IL-7.

**Figure S3. Overexpression of t-STAT1 leads to an enrichment of STAT1/IFN genes in T cells stimulated with IL-7.** Sorted WT (n= 3) and STAT1 Tg (n= 3) CD4 Naïve T cells were stimulated or not overnight with rmIL-7 (20 ng/ml) or rmIFN- $\gamma$  (10 ng/ml). RNA was isolated and gene expression was measured by RNA-seq. Libraries were prepared with 0.25-1  $\mu$ g of total RNA using the TruSeq RNA Sample Preparation Kit V2 and sequenced for 50 cycles with a HiSeq 2500 instrument (Illumina). 50 bp reads were then mapped onto mouse genome build mm9 using TopHat and further processed using Cufflinks (1). Lists of differentially expressed gene transcripts (DEGs) by IL-7 or IFN- $\gamma$  stimulation in WT and STAT1 Tg were selected based on gene expression changes of at least 2 fold compared to unstimulated cells. **(A)** Venn diagrams illustrate the overlap between WT (black) and STAT1 Tg (red) DEGs in response to IL-7 in CD4 Naïve T cells. **(B)** Venn diagrams illustrate the overlap between the DEGs in WT cells stimulated with IFN- $\gamma$  (green) and the DEGs in WT (black) or STAT1 Tg (red) T cells stimulated with IL-7. **(C)** Gene expression of *Bcl2*, *Cish*, *Cxcl10*, *Ifit1*, *Socs1*, *Bik*, *Ifi27* and *Socs2* was measured by quantitative RT-PCR (Quantitect SYBR green PCR system, Qiagen). The primer sequences are presented in Table S9. Gene expression values were normalized to those of *Hprt* in the same sample and fold changes were calculated relative to unstimulated condition for each mouse. Data represent mean  $\pm$  SE of the log<sub>2</sub> (Fold change) of triplicate samples in two independent experiments. A nonparametric Mann-Whitney test was performed for comparisons between WT (black symbols) and STAT1 Tg (red symbols) cells.

**Figure S4. STAT1 overexpression induces a distinct transcriptional program in CD4 T cells stimulated with IL-7.** Sorted WT and STAT1 Tg CD4 Naïve T cells were treated and analyzed as described in Figure 3 (90 minutes stimulation) or Figure S3 (overnight stimulation). Lists of

DEGs. their  $\log_2(\text{FC})$  and adjusted  $p$  values were generated for these cells and used as input in IPA software. A positive or negative z-score value indicates that a function is predicted to be increased or decreased in T cells stimulated with IL-7. All categories shown are significant ( $p < 0.05$ ). **(A)** Bar graphs show the overall affected categories of diseases and biological functions predicted by IPA analysis in WT (black) and STAT1 Tg (red) CD4 T cells stimulated 90 minutes with IL-7. Top 10 activated annotations and the number of RNAs (#Mol) differentially expressed in each are listed in the tables. **(B)** Bar graphs represent the top 10 diseases or functions annotations associated to Cell Death and Survival, Cellular Growth and Proliferation and Hematological System Development and Function categories predicted by IPA analysis in these conditions. **(C)** Bar graphs show the overall affected categories of diseases and biological functions predicted by IPA analysis in WT (black) and STAT1 Tg (red) CD4 T cells stimulated overnight with IL-7. Top 10 activated annotations and the number of RNAs (#Mol) differentially expressed in each are listed in the tables. **(D)** Bar graphs represent the top 10 diseases or functions annotations associated to Cell Death and Survival categories predicted by IPA analysis in these conditions.

**Figure S5. WT and STAT1 Tg donor T cells exhibit similar responses to IL-7 through STAT5 and to IFN- $\gamma$  through STAT1 after adoptive transfer into RAG<sup>-/-</sup> mice.** Lymphopenic RAG<sup>-/-</sup> mice were injected i.v. with  $6 \times 10^6$  of CTV-labeled T cells isolated from the LNs of congenic WT (n= 9) or STAT1 Tg (n= 9) mice. The levels of IL-7R $\alpha$ , p-STAT5 and p-STAT1 of donor T cells were evaluated by flow cytometry in LNs 7 days post-transfer as function of CTV Fluorescence after *in vitro* stimulation with rmIL-7 (1 ng/ml) and IFN- $\gamma$  (10 ng/ml) respectively. **(A)** The percentages of donor T cells CTV<sup>+</sup> IL-7R $\alpha$ <sup>high</sup>, CTV<sup>+</sup> IL-7R $\alpha$ <sup>low</sup>, CTV<sup>-</sup> IL-7R $\alpha$ <sup>high</sup> and CTV<sup>-</sup> IL-7R $\alpha$ <sup>low</sup> are indicated. The MFIs of IL-7R $\alpha$  in CD4 and CD8 donor T cells after adoptive

transfer into *RAG*<sup>-/-</sup> mice (SP and FP) were compared using a nonparametric Mann-Whitney test. **(B)** The percentages of donor T cells CTV<sup>+</sup> p-STAT5<sup>high</sup>, CTV<sup>+</sup> p-STAT5<sup>low</sup>, CTV<sup>-</sup> p-STAT5<sup>high</sup> and CTV<sup>-</sup> p-STAT5<sup>low</sup> are indicated. The MFIs of p-STAT5 in CD4 and CD8 donor T cells before (d0) and after adoptive transfer into *RAG*<sup>-/-</sup> mice (SP) were compared as described above. **(C)** The percentages of donor T cells CTV<sup>+</sup> p-STAT1<sup>high</sup>, CTV<sup>+</sup> p-STAT1<sup>low</sup>, CTV<sup>-</sup> p-STAT1<sup>high</sup> and CTV<sup>-</sup> p-STAT1<sup>low</sup> are indicated. The MFIs of p-STAT1 in CD4 and CD8 donor T cells before (d0) and after adoptive transfer into *RAG*<sup>-/-</sup> mice (SP) were compared as described above. Data are presented as box and whisker plots showing the median MFI value bounded by the first and third quartiles in the box, with whiskers extending to the minimum and maximum values from three independent experiments out of three, including an average of 3 mice per group and experiment.

#### Supplemental References

1. Villarino A, et al. Signal transducer and activator of transcription 5 (STAT5) paralog dose governs T cell effector and regulatory functions. *Elife*. 2016;5:e08384.

# Figure S1

## A Human CD2 mini-cassette

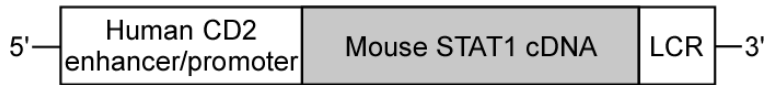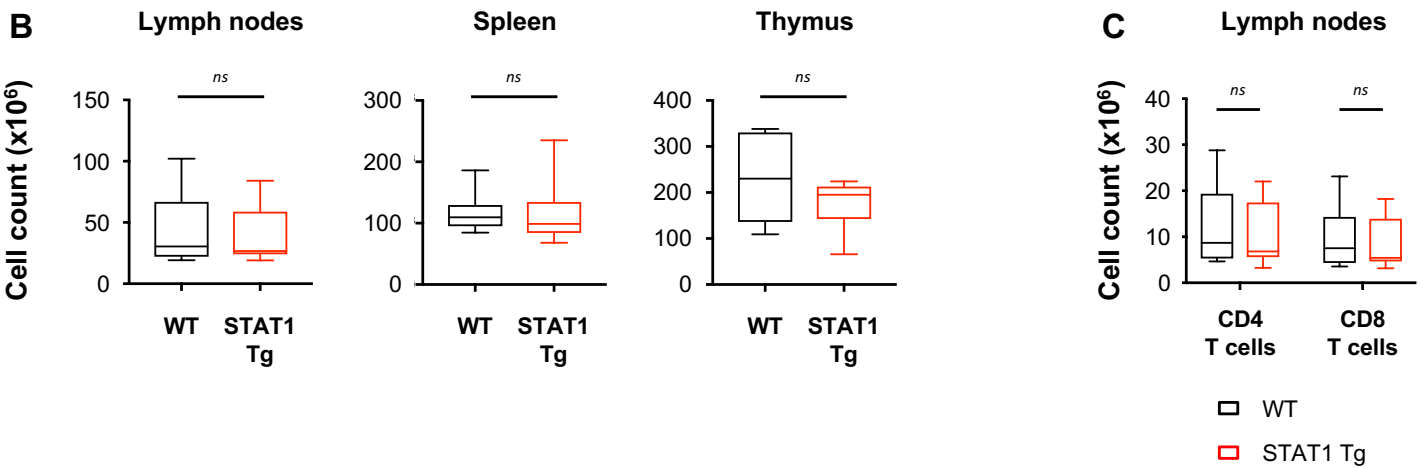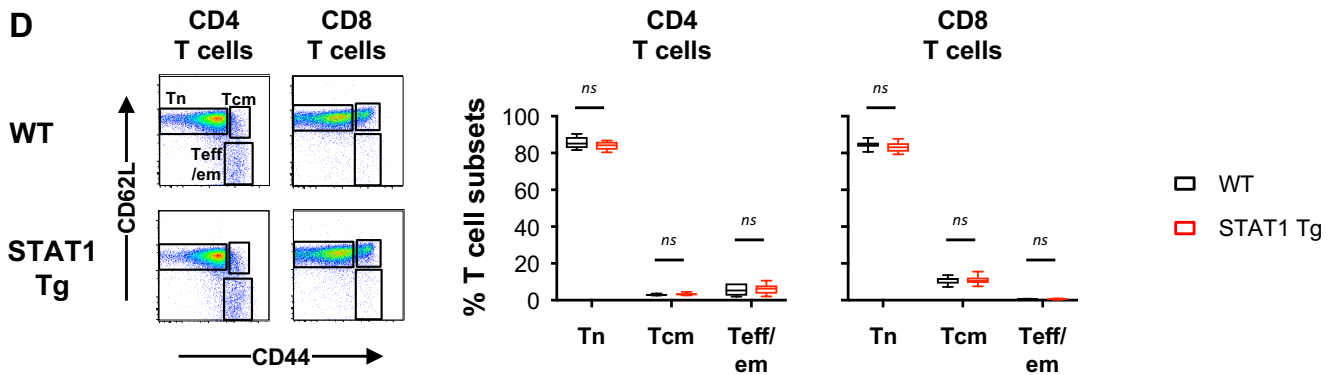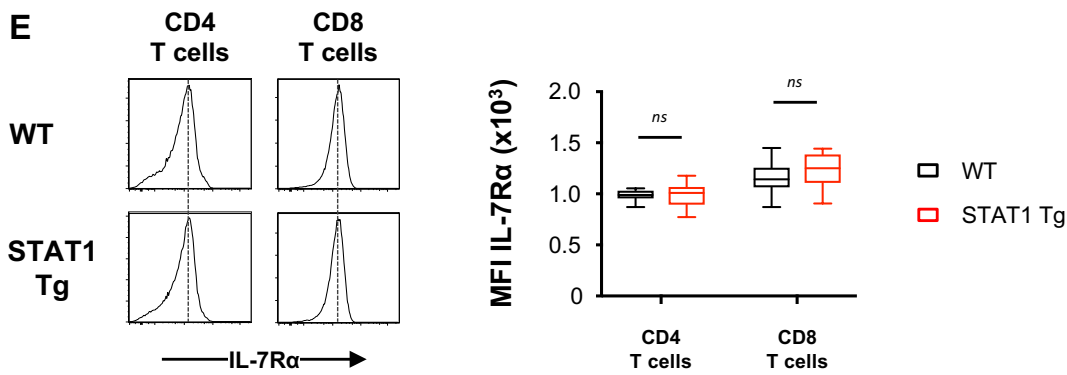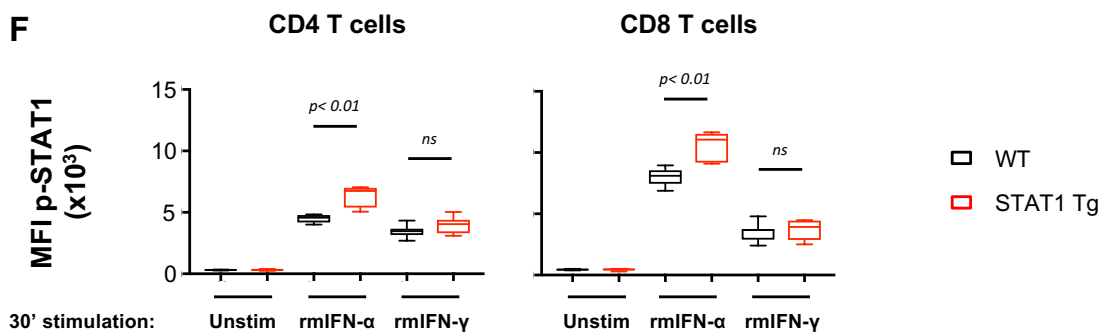

# Figure S2

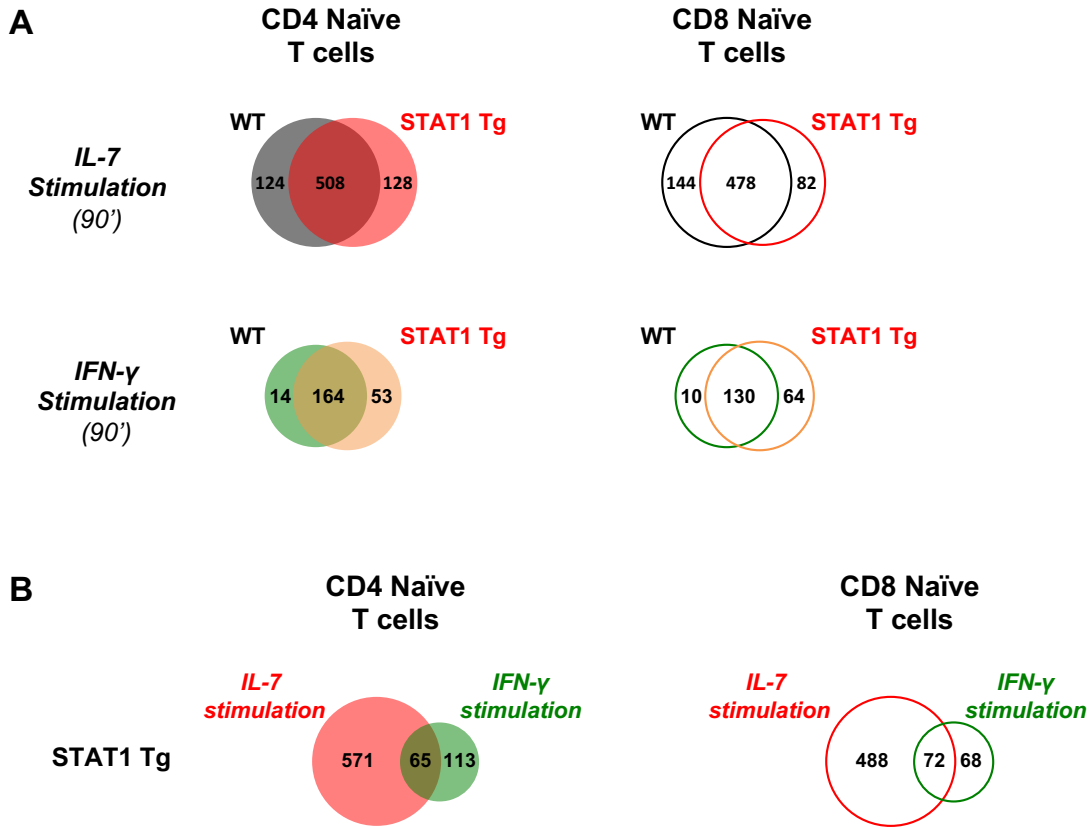

**Figure S3**

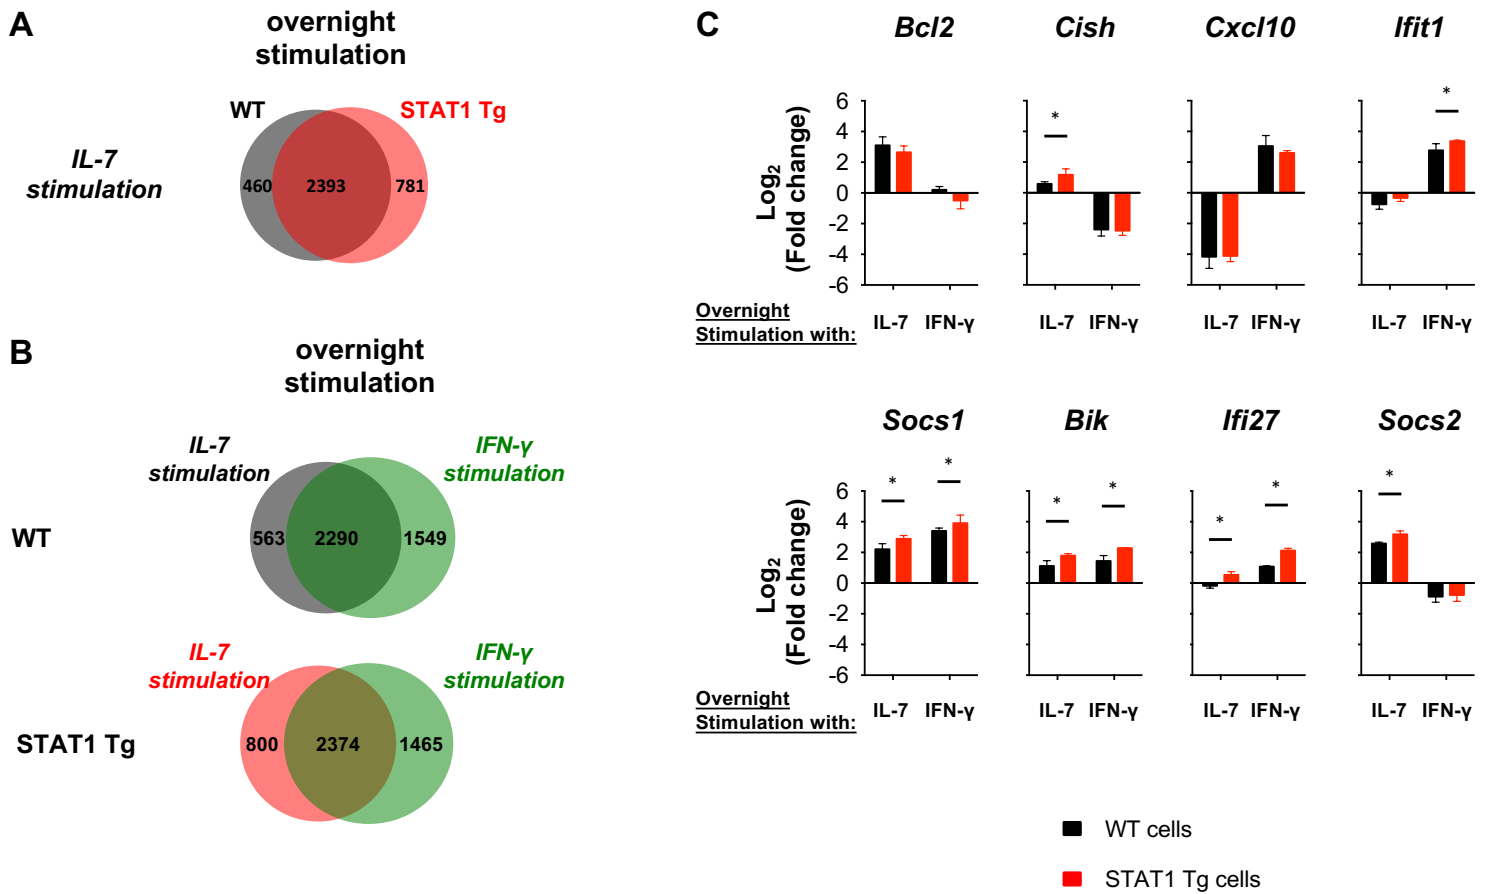



**Figure S4**

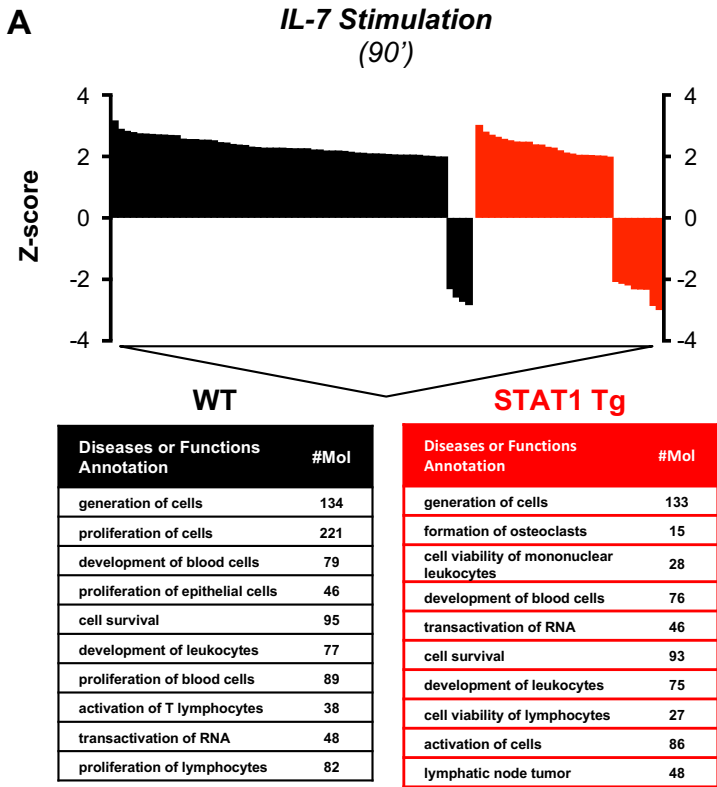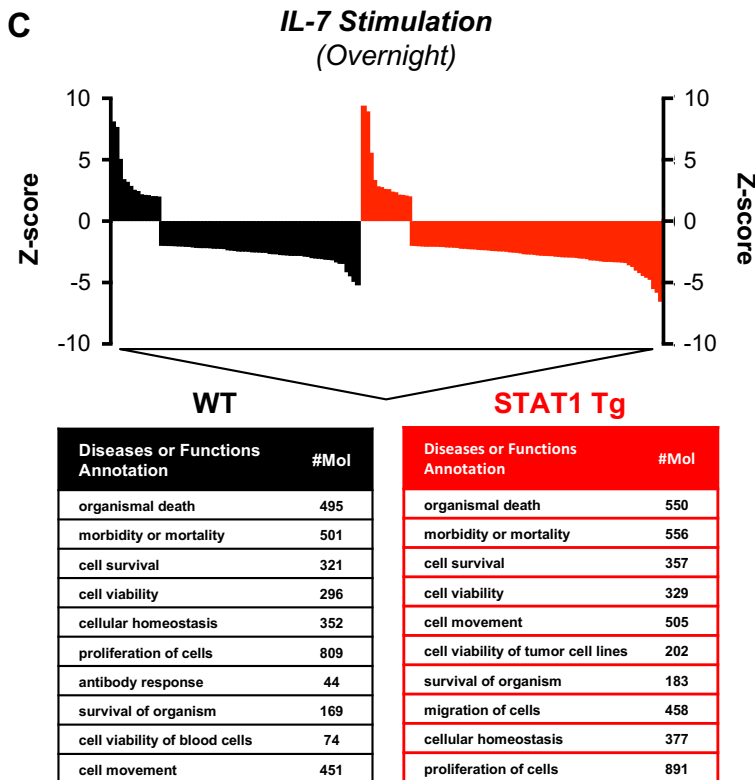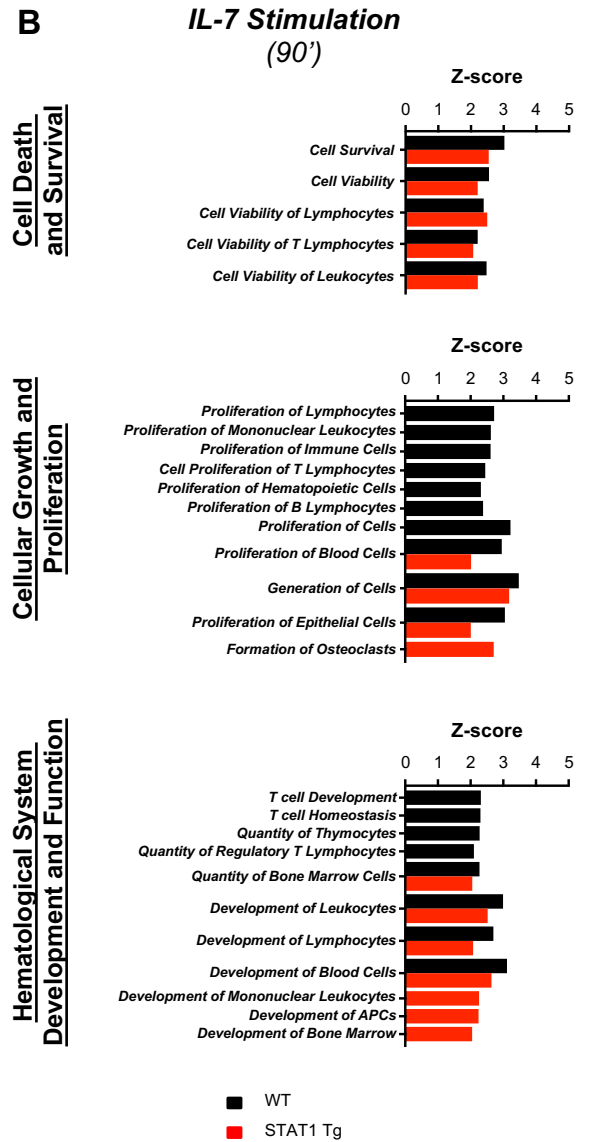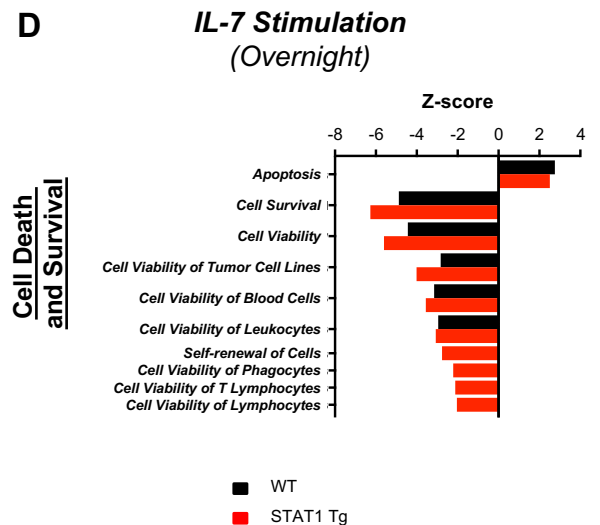

**Figure S5**

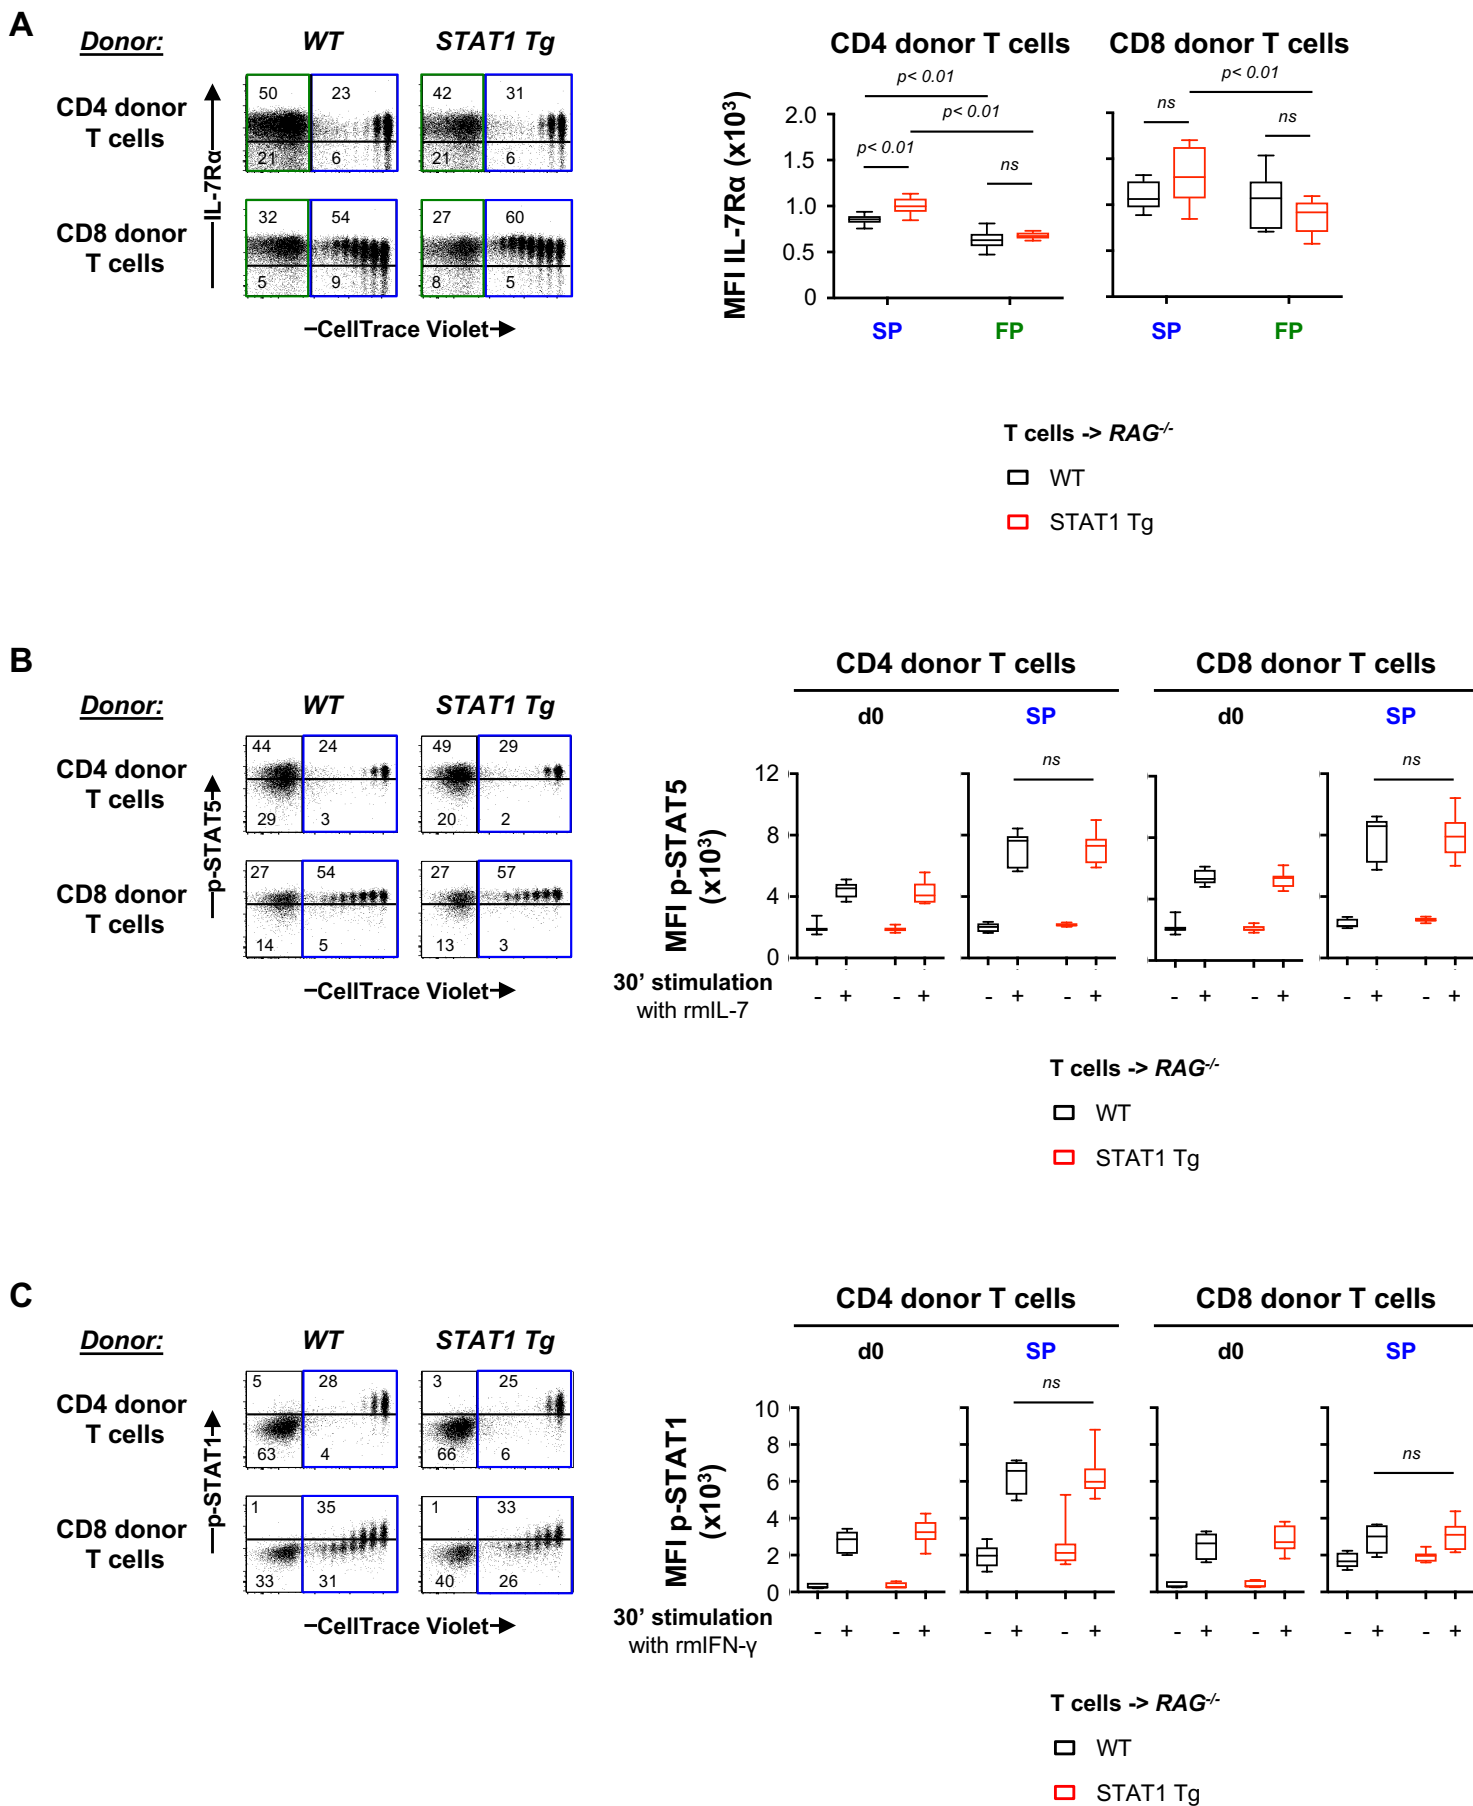

**Table S1. Overlapping DEGs by IL-7 and IFN- $\gamma$  stimulation in WT T cells (Extended**

*Table 2)*

| Gene ID                  | IL-7 stimulation                   |                          | IFN- $\gamma$ stimulation |                          |
|--------------------------|------------------------------------|--------------------------|---------------------------|--------------------------|
|                          | Log <sub>2</sub> (FC) <sup>†</sup> | Adjusted <i>p</i> -value | Log <sub>2</sub> (FC)     | Adjusted <i>p</i> -value |
| <b>CD4 Naive T cells</b> |                                    |                          |                           |                          |
| <i>5730508B09Rik</i>     | 1.66                               | 9.59E-15                 | 1.19                      | 4.51E-10                 |
| <i>5830468F06Rik</i>     | 3.12                               | 7.80E-24                 | 3.09                      | 4.00E-24                 |
| <i>9330175E14Rik</i>     | 2.16                               | 1.18E-11                 | 2.50                      | 2.44E-13                 |
| <i>9530082P21Rik</i>     | 1.56                               | 1.35E-03                 | 1.38                      | 2.01E-02                 |
| <i>Abcg3</i>             | 1.19                               | 6.93E-04                 | 1.78                      | 3.32E-06                 |
| <i>Acvr1c</i>            | 5.24                               | 3.09E-16                 | 2.77                      | 9.28E-08                 |
| <i>Arid5b</i>            | 1.83                               | 3.36E-06                 | 2.48                      | 1.28E-08                 |
| <i>B430306N03Rik</i>     | 1.42                               | 1.82E-08                 | 1.49                      | 1.91E-08                 |
| <i>Bcl3</i>              | 2.41                               | 5.19E-11                 | 2.88                      | 5.54E-13                 |
| <i>Fas</i>               | 1.11                               | 1.34E-06                 | 1.38                      | 3.90E-08                 |
| <i>Gadd45g</i>           | 3.82                               | 1.37E-09                 | 2.67                      | 1.62E-05                 |
| <i>Gata1</i>             | 2.50                               | 1.48E-06                 | 3.94                      | 5.46E-11                 |
| <i>Gbp10</i>             | 2.92                               | 1.37E-06                 | 6.65                      | 3.01E-16                 |
| <i>Gbp11_1</i>           | 6.05                               | 1.62E-19                 | 4.94                      | 2.28E-16                 |
| <i>Gbp4</i>              | 2.00                               | 4.75E-09                 | 4.22                      | 4.81E-19                 |
| <i>Gbp5</i>              | 2.41                               | 4.13E-11                 | 4.82                      | 4.24E-21                 |
| <i>Gbp6_1</i>            | 2.64                               | 3.42E-05                 | 5.48                      | 2.24E-12                 |
| <i>Gbp6_2</i>            | 1.74                               | 4.11E-04                 | 5.16                      | 3.90E-15                 |
| <i>Gm12185</i>           | 1.70                               | 2.59E-10                 | 3.92                      | 2.24E-22                 |
| <i>Gm16174</i>           | 2.24                               | 1.25E-03                 | 2.01                      | 1.64E-02                 |
| <i>Gm26876</i>           | 3.60                               | 1.28E-09                 | 1.55                      | 1.77E-02                 |
| <i>Gm4951</i>            | 1.01                               | 4.49E-02                 | 3.81                      | 1.37E-11                 |
| <i>Gpr155</i>            | 1.08                               | 1.02E-04                 | 1.41                      | 3.16E-06                 |
| <i>Gvin1</i>             | 1.38                               | 1.11E-03                 | 3.11                      | 3.27E-10                 |
| <i>Ifi47</i>             | 3.34                               | 7.44E-11                 | 4.79                      | 1.69E-15                 |
| <i>Igtp</i>              | 2.64                               | 2.03E-16                 | 5.15                      | 3.73E-27                 |
| <i>Iigp1</i>             | 2.68                               | 1.89E-10                 | 6.61                      | 1.10E-23                 |
| <i>Il12rb2</i>           | 4.42                               | 1.99E-06                 | 2.51                      | 2.71E-02                 |
| <i>Il18rap</i>           | 2.89                               | 2.09E-11                 | 2.61                      | 8.02E-10                 |
| <i>Il2rb</i>             | 1.85                               | 1.05E-14                 | 1.43                      | 4.81E-11                 |
| <i>Irf4</i>              | 2.25                               | 2.76E-06                 | 4.35                      | 2.72E-13                 |
| <i>Irf9</i>              | 1.14                               | 2.48E-11                 | 2.53                      | 4.12E-23                 |
| <i>Irgm2</i>             | 1.35                               | 1.27E-08                 | 4.33                      | 4.57E-25                 |
| <i>Jun</i>               | 2.02                               | 4.89E-10                 | 2.34                      | 1.99E-11                 |

|                          |       |          |      |          |
|--------------------------|-------|----------|------|----------|
| <i>Kat2b</i>             | 1.70  | 5.51E-17 | 1.00 | 1.34E-09 |
| <i>Kit</i>               | 2.02  | 8.39E-07 | 2.22 | 3.81E-07 |
| <i>Lrrtm2</i>            | 2.96  | 8.47E-06 | 1.92 | 1.60E-02 |
| <i>Ly6a</i>              | 1.32  | 2.53E-03 | 3.66 | 4.50E-12 |
| <i>Mgat4a</i>            | 1.08  | 4.65E-08 | 1.52 | 1.49E-11 |
| <i>Ms4a6d</i>            | 3.66  | 4.21E-14 | 1.32 | 2.12E-03 |
| <i>Nlrc5</i>             | 1.49  | 1.15E-05 | 1.97 | 1.23E-07 |
| <i>Noc4l</i>             | 1.08  | 4.91E-10 | 1.39 | 8.82E-13 |
| <i>Pim2</i>              | 3.03  | 9.26E-29 | 2.99 | 1.52E-28 |
| <i>Pmepal</i>            | 1.85  | 9.31E-14 | 2.17 | 8.16E-16 |
| <i>Pole2</i>             | 1.86  | 3.09E-16 | 1.18 | 8.64E-10 |
| <i>Ppa1</i>              | 1.15  | 1.78E-04 | 1.85 | 6.60E-08 |
| <i>Rbpms</i>             | 2.54  | 1.55E-07 | 1.48 | 5.98E-03 |
| <i>Rgs1</i>              | 5.34  | 2.12E-15 | 1.33 | 3.98E-02 |
| <i>Ripk1</i>             | 1.26  | 2.12E-15 | 1.44 | 3.02E-17 |
| <i>Samhd1</i>            | 1.16  | 5.41E-07 | 1.93 | 2.41E-12 |
| <i>Slamf1</i>            | 3.04  | 3.18E-20 | 1.85 | 9.77E-13 |
| <i>Socs1</i>             | 2.47  | 2.93E-09 | 3.37 | 9.18E-13 |
| <i>Socs3</i>             | 2.19  | 8.82E-23 | 1.60 | 5.03E-18 |
| <i>Tgtp1</i>             | 4.27  | 1.11E-17 | 6.68 | 6.95E-25 |
| <i>Tgtp2</i>             | 2.58  | 1.04E-16 | 5.37 | 1.79E-28 |
| <i>Tnfrsf1b</i>          | 1.82  | 7.17E-17 | 1.08 | 1.60E-09 |
| <i>Tnfsf8</i>            | 2.62  | 2.83E-14 | 1.39 | 2.00E-06 |
| <i>Trem12</i>            | 1.29  | 4.19E-13 | 1.38 | 8.29E-14 |
| <i>Zfp455</i>            | 1.29  | 2.01E-05 | 1.13 | 7.16E-04 |
| <b>CD8 Naive T cells</b> |       |          |      |          |
| <i>5830468F06Rik</i>     | 2.27  | 1.66E-19 | 2.45 | 3.73E-20 |
| <i>9330175E14Rik</i>     | 1.94  | 9.44E-11 | 1.88 | 1.69E-09 |
| <i>9530082P21Rik</i>     | 1.96  | 2.75E-05 | 1.33 | 3.16E-02 |
| <i>Abcb11</i>            | 1.63  | 2.49E-05 | 1.73 | 9.17E-05 |
| <i>B430306N03Rik</i>     | 2.11  | 1.29E-13 | 1.13 | 1.36E-05 |
| <i>Bcl3</i>              | 3.12  | 7.66E-15 | 3.33 | 5.29E-15 |
| <i>Csf1</i>              | 2.42  | 3.64E-06 | 4.35 | 1.61E-11 |
| <i>Cyp2s1</i>            | -1.25 | 9.56E-06 | 1.06 | 1.48E-03 |
| <i>F2rl2</i>             | 2.03  | 5.14E-04 | 3.22 | 2.22E-06 |
| <i>Fas</i>               | 1.00  | 4.93E-06 | 1.19 | 1.73E-06 |
| <i>Gadd45g</i>           | 5.15  | 1.07E-13 | 2.74 | 1.27E-05 |
| <i>Gata1</i>             | 3.12  | 5.10E-09 | 4.38 | 2.86E-12 |
| <i>Gbp10</i>             | 3.19  | 1.04E-07 | 6.16 | 5.29E-15 |
| <i>Gbp11_1</i>           | 5.25  | 9.02E-18 | 4.71 | 1.63E-15 |
| <i>Gbp4</i>              | 1.75  | 4.88E-08 | 3.53 | 4.42E-16 |
| <i>Gbp5</i>              | 1.67  | 1.55E-07 | 3.67 | 1.51E-16 |
| <i>Gbp6_1</i>            | 2.88  | 3.60E-06 | 5.24 | 1.10E-11 |

|                  |      |          |      |          |
|------------------|------|----------|------|----------|
| <i>Gbp6_2</i>    | 1.82 | 1.07E-04 | 4.25 | 3.09E-12 |
| <i>Gem</i>       | 2.49 | 3.02E-06 | 2.60 | 1.36E-05 |
| <i>Gm12185</i>   | 2.45 | 1.66E-15 | 3.68 | 4.72E-21 |
| <i>Gm16174</i>   | 2.19 | 8.69E-04 | 2.50 | 1.50E-03 |
| <i>Gm26876</i>   | 3.78 | 1.51E-10 | 1.86 | 2.54E-03 |
| <i>Gm4070</i>    | 1.52 | 8.60E-03 | 3.09 | 2.64E-06 |
| <i>Gm4951</i>    | 1.27 | 4.65E-03 | 2.98 | 1.87E-08 |
| <i>Gpr155</i>    | 1.38 | 5.96E-07 | 1.61 | 2.10E-07 |
| <i>Gpr83</i>     | 3.88 | 1.27E-11 | 1.34 | 3.95E-02 |
| <i>Gvin1</i>     | 1.95 | 2.89E-06 | 3.29 | 7.28E-11 |
| <i>Gzmb</i>      | 3.01 | 4.27E-06 | 2.54 | 7.63E-04 |
| <i>Ifi47</i>     | 3.61 | 3.08E-12 | 4.22 | 1.62E-13 |
| <i>Igtp</i>      | 3.48 | 6.54E-21 | 5.14 | 8.05E-27 |
| <i>Iigp1</i>     | 2.62 | 1.44E-10 | 6.19 | 3.57E-22 |
| <i>Il12rb2</i>   | 3.37 | 1.06E-04 | 4.22 | 2.47E-05 |
| <i>Il18rap</i>   | 1.82 | 6.75E-07 | 1.61 | 6.88E-05 |
| <i>Irf4</i>      | 1.11 | 1.60E-02 | 2.91 | 4.18E-08 |
| <i>Irf9</i>      | 1.25 | 6.63E-13 | 2.02 | 3.16E-19 |
| <i>Irgm1</i>     | 1.75 | 6.21E-10 | 3.99 | 7.29E-21 |
| <i>Irgm2</i>     | 1.95 | 2.03E-13 | 4.07 | 7.51E-24 |
| <i>Jun</i>       | 3.65 | 2.39E-18 | 3.47 | 6.86E-17 |
| <i>Kit</i>       | 1.71 | 9.58E-06 | 2.83 | 9.73E-10 |
| <i>Lgals3bp</i>  | 1.13 | 1.86E-07 | 1.91 | 1.13E-12 |
| <i>Lrrtm2</i>    | 1.75 | 5.53E-03 | 2.08 | 7.97E-03 |
| <i>Ly6a</i>      | 1.93 | 4.98E-06 | 5.11 | 1.02E-16 |
| <i>Map3k8</i>    | 4.32 | 6.10E-17 | 1.09 | 2.09E-02 |
| <i>Mthfd2</i>    | 1.06 | 2.33E-08 | 1.57 | 3.60E-12 |
| <i>Muc1</i>      | 1.18 | 4.77E-02 | 2.70 | 3.62E-05 |
| <i>Nlrc5</i>     | 1.10 | 5.90E-04 | 1.40 | 1.86E-04 |
| <i>Noc4l</i>     | 1.02 | 1.19E-09 | 1.13 | 6.04E-10 |
| <i>Parp14</i>    | 1.00 | 1.01E-04 | 1.88 | 1.72E-09 |
| <i>Pim2</i>      | 3.38 | 1.20E-31 | 2.99 | 1.56E-28 |
| <i>Pole2</i>     | 1.44 | 4.48E-13 | 1.10 | 7.82E-09 |
| <i>Ppa1</i>      | 1.79 | 2.05E-08 | 2.03 | 7.96E-09 |
| <i>Rgs1</i>      | 4.81 | 1.95E-14 | 1.35 | 3.74E-02 |
| <i>Ripk1</i>     | 1.00 | 9.67E-13 | 1.03 | 2.84E-12 |
| <i>Rnf157</i>    | 1.10 | 1.29E-03 | 1.05 | 1.97E-02 |
| <i>Rtp4</i>      | 1.52 | 4.59E-04 | 3.36 | 3.97E-10 |
| <i>Samhd1</i>    | 1.10 | 7.32E-07 | 1.91 | 4.24E-12 |
| <i>Sema4a</i>    | 1.22 | 7.31E-08 | 1.03 | 2.67E-05 |
| <i>Serpina3g</i> | 3.40 | 1.43E-06 | 4.75 | 5.86E-09 |
| <i>Slamf1</i>    | 2.94 | 3.95E-20 | 1.72 | 1.21E-11 |
| <i>Socs3</i>     | 1.99 | 1.17E-21 | 1.37 | 1.79E-15 |

|               |      |          |      |          |
|---------------|------|----------|------|----------|
| <i>Stat2</i>  | 1.03 | 4.53E-06 | 1.71 | 2.43E-10 |
| <i>Syt6</i>   | 4.50 | 8.62E-11 | 1.93 | 1.05E-02 |
| <i>Tgtp1</i>  | 3.77 | 2.66E-16 | 5.38 | 3.50E-21 |
| <i>Tgtp2</i>  | 2.59 | 3.55E-17 | 4.59 | 1.05E-25 |
| <i>Tnfsf8</i> | 2.27 | 8.19E-13 | 1.30 | 1.03E-05 |
| <i>Trem12</i> | 1.43 | 4.84E-15 | 1.16 | 2.26E-11 |

Lists of DEGs, their  $\log_2(\text{FC})$  and adjusted  $p$  values generated for each condition were compared using Venn diagrams to obtain the list of overlapping genes between IL-7 and IFN- $\gamma$  stimulation in WT T cells. \* Fold changes (FC) were calculated relative to unstimulated condition for each sample.

**Table S2. Top 15 IPA-predicted activated upstream regulators in WT T cells stimulated for 90 minutes with IFN- $\gamma$**

| Upstream Regulator       | Activation Z-score <sup>o</sup> | p-value of overlap <sup>*</sup> |
|--------------------------|---------------------------------|---------------------------------|
| <b>CD4 Naive T cells</b> |                                 |                                 |
| IFNG                     | 8.250                           | 1.13E-54                        |
| IRF7                     | 6.104                           | 1.55E-50                        |
| IFNA2                    | 5.800                           | 3.85E-40                        |
| TNF                      | 5.743                           | 6.58E-21                        |
| STAT1                    | 5.646                           | 6.36E-43                        |
| IL-1B                    | 5.376                           | 2.55E-21                        |
| IFNB1                    | 5.161                           | 1.49E-44                        |
| IL-21                    | 5.134                           | 6.24E-36                        |
| IRF3                     | 5.061                           | 7.82E-30                        |
| IRF1                     | 4.499                           | 8.41E-25                        |
| IL-6                     | 4.450                           | 2.89E-18                        |
| IFNL1                    | 4.101                           | 5.58E-22                        |
| OSM                      | 4.088                           | 1.14E-08                        |
| IRF5                     | 3.923                           | 8.05E-21                        |
| NFATC2                   | 3.876                           | 2.33E-22                        |
| <b>CD8 Naive T cells</b> |                                 |                                 |
| IFNG                     | 7.853                           | 7.08E-52                        |
| IRF7                     | 5.617                           | 2.13E-45                        |
| IFNA2                    | 5.371                           | 4.50E-34                        |
| STAT1                    | 5.271                           | 1.07E-40                        |
| IFNB1                    | 5.140                           | 3.74E-39                        |
| IL-1B                    | 5.041                           | 5.14E-24                        |
| IRF3                     | 4.675                           | 3.72E-26                        |
| IL-21                    | 4.640                           | 9.34E-31                        |
| TNF                      | 4.513                           | 5.98E-17                        |
| IRF1                     | 4.166                           | 2.08E-22                        |
| IL-6                     | 3.807                           | 2.72E-20                        |
| OSM                      | 3.715                           | 3.11E-10                        |
| PRL                      | 3.621                           | 7.72E-19                        |
| NFATC2                   | 3.615                           | 2.40E-21                        |
| IRF5                     | 3.530                           | 3.99E-17                        |

Lists of differentially expressed gene transcripts (DEGs), their  $\log_2(\text{FC})$  and adjusted  $p$  values were generated for each condition and used as input in IPA software. <sup>o</sup>Activation  $Z$ -score are based on a model that assigns random regulation directions for predicted upstream regulators.  $Z > 2$  predicts activation of the upstream regulator. <sup>\*</sup>The  $p$ -value of overlap was used to rank the significance associated for each Upstream Regulator. The  $p$ -value indicates the significance of the overlap between the genes targeted by the upstream regulator in the database and the experimental dataset.



**Table S3.** Target genes predicted by IPA with IFNG as activated upstream regulator in WT stimulated for 90 minutes with IL-7 or IFN- $\gamma$

| Gene ID                  | IL-7 stimulation                   |                          | IFN- $\gamma$ stimulation |                          |
|--------------------------|------------------------------------|--------------------------|---------------------------|--------------------------|
|                          | Log <sub>2</sub> (FC) <sup>+</sup> | Adjusted <i>p</i> -value | Log <sub>2</sub> (FC)     | Adjusted <i>p</i> -value |
| <b>CD4 Naive T cells</b> |                                    |                          |                           |                          |
| <i>Bcl3</i>              | 2.41                               | 5.19E-11                 | 2.88                      | 5.54E-13                 |
| <i>Fas</i>               | 1.11                               | 1.34E-06                 | 1.38                      | 3.90E-08                 |
| <i>Gbp5</i>              | 2.41                               | 4.13E-11                 | 4.82                      | 4.24E-21                 |
| <i>Gbp10</i>             | 2.92                               | 1.37E-06                 | 6.65                      | 3.01E-16                 |
| <i>Gvin1</i>             | 1.38                               | 1.11E-03                 | 3.11                      | 3.27E-10                 |
| <i>Ifi47</i>             | 3.34                               | 7.44E-11                 | 4.79                      | 1.69E-15                 |
| <i>Igtp</i>              | 2.64                               | 2.03E-16                 | 5.15                      | 3.73E-27                 |
| <i>Iigp1</i>             | 2.68                               | 1.89E-10                 | 6.61                      | 1.10E-23                 |
| <i>Il12rb2</i>           | 4.42                               | 1.99E-06                 | 2.51                      | 2.71E-02                 |
| <i>Il18rap</i>           | 2.89                               | 2.09E-11                 | 2.61                      | 8.02E-10                 |
| <i>Irf4</i>              | 2.25                               | 2.76E-06                 | 4.35                      | 2.72E-13                 |
| <i>Irf9</i>              | 1.14                               | 2.48E-11                 | 2.53                      | 4.12E-23                 |
| <i>Irgm2</i>             | 1.35                               | 1.27E-08                 | 4.33                      | 4.57E-25                 |
| <i>Jun</i>               | 2.02                               | 4.89E-10                 | 2.34                      | 1.99E-11                 |
| <i>Ly6a</i>              | 1.32                               | 2.53E-03                 | 3.66                      | 4.50E-12                 |
| <i>Nlrc5</i>             | 1.49                               | 1.15E-05                 | 1.97                      | 1.23E-07                 |
| <i>Pim2</i>              | 3.03                               | 9.26E-29                 | 2.99                      | 1.52E-28                 |
| <i>Ripk1</i>             | 1.26                               | 2.12E-15                 | 1.44                      | 3.02E-17                 |
| <i>Samhd1</i>            | 1.16                               | 5.41E-07                 | 1.93                      | 2.41E-12                 |
| <i>Slamf1</i>            | 3.04                               | 3.18E-20                 | 1.85                      | 9.77E-13                 |
| <i>Socs1</i>             | 2.47                               | 2.93E-09                 | 3.37                      | 9.18E-13                 |
| <i>Socs3</i>             | 2.19                               | 8.82E-23                 | 1.60                      | 5.03E-18                 |
| <i>Tgtp1</i>             | 4.27                               | 1.11E-17                 | 6.68                      | 6.95E-25                 |
| <i>Tnfrsf1b</i>          | 1.82                               | 7.17E-17                 | 1.08                      | 1.60E-09                 |
| <b>CD8 Naive T cells</b> |                                    |                          |                           |                          |
| <i>Bcl3</i>              | 3.12                               | 7.66E-15                 | 3.33                      | 5.29E-15                 |
| <i>Csf1</i>              | 2.42                               | 3.64E-06                 | 4.35                      | 1.61E-11                 |
| <i>Fas</i>               | 1.00                               | 4.93E-06                 | 1.19                      | 1.73E-06                 |
| <i>Gbp5</i>              | 1.67                               | 1.55E-07                 | 3.67                      | 1.51E-16                 |
| <i>Gbp10</i>             | 3.19                               | 1.04E-07                 | 6.16                      | 5.29E-15                 |
| <i>Gpr83</i>             | 3.88                               | 1.27E-11                 | 1.34                      | 3.95E-02                 |
| <i>Gvin1</i>             | 1.95                               | 2.89E-06                 | 3.29                      | 7.28E-11                 |
| <i>Ifi47</i>             | 3.61                               | 3.08E-12                 | 4.22                      | 1.62E-13                 |

|                  |      |          |      |          |
|------------------|------|----------|------|----------|
| <i>Igtp</i>      | 3.48 | 6.54E-21 | 5.14 | 8.05E-27 |
| <i>Iigp1</i>     | 2.62 | 1.44E-10 | 6.19 | 3.57E-22 |
| <i>Il12rb2</i>   | 3.37 | 1.06E-04 | 4.22 | 2.47E-05 |
| <i>Il18rap</i>   | 1.82 | 6.75E-07 | 1.61 | 6.88E-05 |
| <i>Irf4</i>      | 1.11 | 1.60E-02 | 2.91 | 4.18E-08 |
| <i>Irf9</i>      | 1.25 | 6.63E-13 | 2.02 | 3.16E-19 |
| <i>Irgm2</i>     | 1.95 | 2.03E-13 | 4.07 | 7.51E-24 |
| <i>Irgm1</i>     | 1.76 | 6.21E-10 | 4.00 | 7.29E-21 |
| <i>Jun</i>       | 3.65 | 2.39E-18 | 3.47 | 6.86E-17 |
| <i>Lgals3bp</i>  | 1.13 | 1.86E-07 | 1.91 | 1.13E-12 |
| <i>Ly6a</i>      | 1.93 | 4.98E-06 | 5.11 | 1.02E-16 |
| <i>Map3k8</i>    | 4.32 | 6.10E-17 | 1.09 | 2.09E-02 |
| <i>Nlrc5</i>     | 1.10 | 5.90E-04 | 1.40 | 1.86E-04 |
| <i>Pim2</i>      | 3.38 | 1.20E-31 | 2.99 | 1.56E-28 |
| <i>Ripk1</i>     | 1.00 | 9.67E-13 | 1.03 | 2.84E-12 |
| <i>Rtp4</i>      | 1.52 | 4.59E-04 | 3.36 | 3.97E-10 |
| <i>Samhd1</i>    | 1.10 | 7.32E-07 | 1.91 | 4.24E-12 |
| <i>Sema4a</i>    | 1.22 | 7.31E-08 | 1.03 | 2.67E-05 |
| <i>Serpina3g</i> | 3.40 | 1.43E-06 | 4.75 | 5.86E-09 |
| <i>Slamf1</i>    | 2.94 | 3.95E-20 | 1.72 | 1.21E-11 |
| <i>Socs3</i>     | 1.99 | 1.17E-21 | 1.37 | 1.79E-15 |
| <i>Stat2</i>     | 1.03 | 4.53E-06 | 1.72 | 2.43E-10 |
| <i>Tgtp1</i>     | 3.77 | 2.66E-16 | 5.38 | 3.50E-21 |

Lists of DEGs, their  $\log_2(\text{FC})$  and adjusted  $p$ -values generated for each condition were used as input in IPA software to obtain a list of predicted upstream regulators (Figure 4A and Table S2) and their target genes among the DEGs. \* Fold changes (FC) were calculated relative to unstimulated condition for each sample.

**Table S4.** Target genes predicted by IPA with STAT1 as activated upstream regulator in WT T cells stimulated for 90 minutes with IL-7 or IFN- $\gamma$

| Gene ID                  | IL-7 stimulation      |                          | IFN- $\gamma$ stimulation |                          |
|--------------------------|-----------------------|--------------------------|---------------------------|--------------------------|
|                          | Log <sub>2</sub> (FC) | Adjusted <i>p</i> -value | Log <sub>2</sub> (FC)     | Adjusted <i>p</i> -value |
| <b>CD4 Naive T cells</b> |                       |                          |                           |                          |
| <i>Fas</i>               | 1.11                  | 1.34E-06                 | 1.38                      | 3.90E-08                 |
| <i>Gbp5</i>              | 2.41                  | 4.13E-11                 | 4.82                      | 4.24E-21                 |
| <i>Gbp10</i>             | 2.92                  | 1.37E-06                 | 6.65                      | 3.01E-16                 |
| <i>Ifi47</i>             | 3.34                  | 7.44E-11                 | 4.79                      | 1.69E-15                 |
| <i>Igtp</i>              | 2.64                  | 2.03E-16                 | 5.15                      | 3.73E-27                 |
| <i>Il12rb2</i>           | 4.42                  | 1.99E-06                 | 2.51                      | 2.71E-02                 |
| <i>Irf9</i>              | 1.14                  | 2.48E-11                 | 2.53                      | 4.12E-23                 |
| <i>Jun</i>               | 2.02                  | 4.89E-10                 | 2.34                      | 1.99E-11                 |
| <i>Samhd1</i>            | 1.16                  | 5.41E-07                 | 1.93                      | 2.41E-12                 |
| <i>Socs1</i>             | 2.47                  | 2.93E-09                 | 3.37                      | 9.18E-13                 |
| <i>Socs3</i>             | 2.19                  | 8.82E-23                 | 1.60                      | 5.03E-18                 |
| <i>Tgtp1</i>             | 4.27                  | 1.11E-17                 | 6.68                      | 6.95E-25                 |
| <b>CD8 Naive T cells</b> |                       |                          |                           |                          |
| <i>Fas</i>               | 1.00                  | 4.93E-06                 | 1.19                      | 1.73E-06                 |
| <i>Gbp5</i>              | 1.67                  | 1.55E-07                 | 3.67                      | 1.51E-16                 |
| <i>Gbp10</i>             | 3.19                  | 1.04E-07                 | 6.16                      | 5.29E-15                 |
| <i>Gzmb</i>              | 3.01                  | 4.27E-06                 | 2.54                      | 7.63E-04                 |
| <i>Ifi47</i>             | 3.61                  | 3.08E-12                 | 4.22                      | 1.62E-13                 |
| <i>Igtp</i>              | 3.48                  | 6.54E-21                 | 5.14                      | 8.05E-27                 |
| <i>Il12rb2</i>           | 3.37                  | 1.06E-04                 | 4.22                      | 2.47E-05                 |
| <i>Irf9</i>              | 1.25                  | 6.63E-13                 | 2.02                      | 3.16E-19                 |
| <i>Irgm1</i>             | 1.76                  | 6.21E-10                 | 4.00                      | 7.29E-21                 |
| <i>Jun</i>               | 3.65                  | 2.39E-18                 | 3.47                      | 6.86E-17                 |
| <i>Samhd1</i>            | 1.10                  | 7.32E-07                 | 1.91                      | 4.24E-12                 |
| <i>Serpina3g</i>         | 3.40                  | 1.43E-06                 | 4.75                      | 5.86E-09                 |
| <i>Socs3</i>             | 1.99                  | 1.17E-21                 | 1.37                      | 1.79E-15                 |
| <i>Stat2</i>             | 1.03                  | 4.53E-06                 | 1.72                      | 2.43E-10                 |
| <i>Tgtp1</i>             | 3.77                  | 2.66E-16                 | 5.38                      | 3.50E-21                 |

Lists of DEGs, their log<sub>2</sub>(FC) and adjusted *p*-values generated for each condition were used as input in IPA software to obtain a list of predicted upstream regulators (Figure 4A and

Table S2) and their target genes among the DEGs. \* Fold changes (FC) were calculated relative to unstimulated condition for each sample.

**Table S5.** Top 15 IPA-predicted activated upstream regulators in STAT1 Tg T cells stimulated for 90 minutes with IL-7

| Upstream Regulator       | Activation Z-score <sup>o</sup> | p-value of overlap <sup>★</sup> |
|--------------------------|---------------------------------|---------------------------------|
| <b>CD4 Naive T cells</b> |                                 |                                 |
| IL-2                     | 4.220                           | 7.93E-32                        |
| IRF7                     | 4.101                           | 7.54E-08                        |
| IFNG                     | 4.008                           | 2.36E-27                        |
| IL-4                     | 3.920                           | 4.06E-34                        |
| IL-5                     | 3.638                           | 1.07E-20                        |
| CSF2                     | 3.551                           | 3.05E-18                        |
| STAT1                    | 3.481                           | 1.37E-14                        |
| IL-15                    | 3.388                           | 2.38E-17                        |
| EPO                      | 3.377                           | 2.24E-08                        |
| STAT5B                   | 3.363                           | 1.87E-13                        |
| IL-18                    | 3.298                           | 2.03E-07                        |
| STAT4                    | 3.292                           | 1.14E-14                        |
| IL-7                     | 3.226                           | 8.91E-21                        |
| IL-3                     | 3.221                           | 1.91E-13                        |
| IFNA2                    | 2.990                           | 1.21E-10                        |
| <b>CD8 Naive T cells</b> |                                 |                                 |
| IFNG                     | 5.577                           | 1.58E-29                        |
| IL-2                     | 5.368                           | 1.62E-34                        |
| STAT1                    | 5.042                           | 5.64E-18                        |
| IRF7                     | 4.620                           | 5.34E-13                        |
| IL-1B                    | 4.327                           | 4.42E-19                        |
| STAT4                    | 4.149                           | 3.35E-16                        |
| IL-5                     | 4.041                           | 3.63E-19                        |
| IL-3                     | 4.029                           | 1.29E-13                        |
| PRL                      | 3.925                           | 1.28E-14                        |
| IL-15                    | 3.867                           | 1.90E-19                        |
| IFNA2                    | 3.809                           | 2.22E-14                        |
| IL-13                    | 3.703                           | 1.75E-05                        |
| IL-18                    | 3.700                           | 4.95E-09                        |
| IL-7                     | 3.622                           | 9.08E-25                        |
| IL-21                    | 3.587                           | 3.35E-18                        |

Lists of differentially expressed gene transcripts (DEGs), their  $\log_2(\text{FC})$  and adjusted  $p$  values were generated for each condition and used as input in IPA software.  $\circ$ Activation  $Z$ -score are based on a model that assigns random regulation directions for predicted upstream regulators.  $Z > 2$  predicts activation of the upstream regulator.  $\star$ The  $p$ -value of overlap was used to rank the significance associated for each Upstream Regulator. The  $p$ -value indicates the significance of the overlap between the genes targeted by the upstream regulator in the database and the experimental dataset.

**Table S6.** Top 10 DAVID-predicted enriched Biological processes within DEGs unique to CD4 or CD8 Naive T cells stimulated for 90 minutes with IL-7

| WT cells stimulated with IL-7                          |             |                  | STAT1 Tg cells stimulated with IL-7       |             |                 |
|--------------------------------------------------------|-------------|------------------|-------------------------------------------|-------------|-----------------|
| Description                                            | Gene counts | <i>p</i> -value* | Description                               | Gene counts | <i>p</i> -value |
| <b>CD4 Naive T cells</b>                               |             |                  |                                           |             |                 |
| Regulation of programmed cell death                    | 16          | 1.46E-04         | Regulation of programmed cell death       | 14          | 5.82E-03        |
| Regulation of cell death                               | 16          | 1.55E-04         | Regulation of cell death                  | 14          | 6.08E-03        |
| Death                                                  | 15          | 2.29E-04         | Death                                     | 16          | 3.45E-04        |
| Regulation of apoptosis                                | 15          | 4.35E-04         | Regulation of apoptosis                   | 14          | 5.25E-03        |
| Apoptosis                                              | 14          | 2.75E-04         | Apoptosis                                 | 15          | 3.64E-04        |
| Programmed cell death                                  | 14          | 3.24E-04         | Programmed cell death                     | 15          | 4.32E-04        |
| Cell death                                             | 14          | 6.24E-04         | Cell death                                | 15          | 8.55E-04        |
| Positive regulation of macromolecule metabolic process | 12          | 2.70E-02         | Phosphate metabolic process               | 17          | 1.87E-02        |
| Intracellular signaling cascade                        | 16          | 1.70E-02         | Phosphorus metabolic process              | 17          | 1.87E-02        |
| Regulation of cell proliferation                       | 11          | 2.29E-02         | Cell cycle                                | 14          | 1.16E-02        |
| <b>CD8 Naive T cells</b>                               |             |                  |                                           |             |                 |
| Hemopoietic or lymphoid organ development              | 8           | 1.84E-02         | Hemopoietic or lymphoid organ development | 7           | 1.83E-02        |
| Immune system development                              | 8           | 2.33E-02         | Immune system development                 | 7           | 2.27E-02        |

|                                                                |    |          |                                                  |    |          |
|----------------------------------------------------------------|----|----------|--------------------------------------------------|----|----------|
| <b>Immune response</b>                                         | 14 | 5.76E-04 | <b>Homeostatic process</b>                       | 11 | 1.15E-02 |
| <b>Regulation of small GTPase mediated signal transduction</b> | 7  | 2.23E-02 | <b>Regulation of hydrolase activity</b>          | 6  | 1.54E-02 |
| <b>Regulation of Ras protein signal transduction</b>           | 6  | 3.00E-02 | <b>Hemopoiesis</b>                               | 6  | 3.92E-02 |
| <b>Gland development</b>                                       | 6  | 4.08E-02 | <b>Small GTPase mediated signal transduction</b> | 6  | 4.33E-02 |
| <b>Tissue homeostasis</b>                                      | 5  | 1.31E-03 | <b>Regulation of GTPase activity</b>             | 5  | 5.06E-03 |
| <b>Multicellular organismal homeostasis</b>                    | 5  | 4.74E-03 | <b>Homeostasis of number of cells</b>            | 5  | 9.98E-03 |
| <b>Anatomical structure homeostasis</b>                        | 5  | 8.21E-03 | <b>Regulation of cytokine production</b>         | 5  | 2.00E-02 |
| <b>Lymph node development</b>                                  | 4  | 7.41E-04 | <b>Regulation of cytokine secretion</b>          | 4  | 1.70E-04 |

Gene Ontology (GO) term enrichment analysis was performed using Database for Annotation, Visualization and Integrated Discovery (DAVID) Bioinformatics Resources 6.7 (<https://david.ncifcrf.gov/>) to assess the top biological processes associated with the lists of DEGs by IL-7 in WT and STAT1 Tg T cells. Lists of DEGs, their  $\log_2(\text{FC})$  and adjusted  $p$  values generated for WT and STAT1 Tg T cells stimulated for 90 minutes with rmIL-7 were used as input in DAVID website. \*Gene counts indicate the number of enriched DEGs in the pathway. \*The  $p$ -value indicates the perturbation of each pathway.



**Table S7. Overlapping DEGs by IL-7 and IFN- $\gamma$  overnight stimulation in WT and STAT1 Tg CD4 Naïve T cells**

| Gene ID                  | WT cells stimulated with IL-7      |                          | STAT1 Tg cells stimulated with IL-7 |                          | WT cells stimulated with IFN- $\gamma$ |                          |
|--------------------------|------------------------------------|--------------------------|-------------------------------------|--------------------------|----------------------------------------|--------------------------|
|                          | Log <sub>2</sub> (FC) <sup>+</sup> | Adjusted <i>p</i> -value | Log <sub>2</sub> (FC)               | Adjusted <i>p</i> -value | Log <sub>2</sub> (FC)                  | Adjusted <i>p</i> -value |
| <b>CD4 Naïve T cells</b> |                                    |                          |                                     |                          |                                        |                          |
| <i>0610009L18Rik</i>     | 1.44                               | 1.16E-04                 | 1.49                                | 2.26E-04                 | 1.28                                   | 2.61E-04                 |
| <i>0610038B21Rik</i>     | 1.25                               | 1.94E-03                 | 1.16                                | 6.74E-03                 | 1.20                                   | 2.45E-03                 |
| <i>1110002L01Rik</i>     | 1.77                               | 1.36E-06                 | 2.18                                | 6.73E-07                 | 2.16                                   | 1.81E-07                 |
| <i>1110032F04Rik</i>     | -1.69                              | 2.90E-07                 | -1.82                               | 4.53E-07                 | -1.30                                  | 2.04E-06                 |
| <i>1190007I07Rik</i>     | 1.13                               | 3.94E-04                 | 1.61                                | 5.96E-05                 | 1.37                                   | 7.55E-05                 |
| <i>1300002E11Rik</i>     | 1.21                               | 2.44E-07                 | 1.33                                | 3.13E-07                 | 1.53                                   | 2.38E-08                 |
| <i>1700001K19Rik</i>     | -1.25                              | 2.15E-02                 | -1.71                               | 6.99E-03                 | -1.86                                  | 1.69E-03                 |
| <i>1700010I14Rik</i>     | 1.24                               | 3.34E-04                 | 1.07                                | 2.23E-03                 | 1.55                                   | 4.67E-05                 |
| <i>1700019B03Rik</i>     | -2.97                              | 7.71E-04                 | -4.03                               | 1.80E-04                 | -4.67                                  | 1.71E-05                 |
| <i>1700021A07Rik</i>     | 1.55                               | 3.66E-03                 | 1.29                                | 2.15E-02                 | 1.68                                   | 1.99E-03                 |
| <i>1700025G04Rik</i>     | 1.40                               | 2.82E-09                 | 1.58                                | 3.71E-09                 | 1.05                                   | 6.06E-09                 |
| <i>1700029H14Rik</i>     | -1.52                              | 2.15E-03                 | -2.04                               | 5.97E-04                 | -2.00                                  | 2.54E-04                 |
| <i>1700030C12Rik</i>     | -1.76                              | 3.22E-02                 | -1.79                               | 4.91E-02                 | -2.22                                  | 8.39E-03                 |
| <i>1700030J22Rik</i>     | -1.31                              | 1.32E-02                 | -1.21                               | 3.52E-02                 | -1.19                                  | 2.03E-02                 |
| <i>1700030K09Rik</i>     | 1.84                               | 4.60E-06                 | 1.45                                | 9.19E-05                 | 2.23                                   | 6.73E-07                 |
| <i>1700052N19Rik</i>     | 1.61                               | 7.81E-10                 | 1.76                                | 1.11E-09                 | 1.89                                   | 5.00E-11                 |
| <i>1700066B19Rik</i>     | 2.20                               | 2.40E-03                 | 1.84                                | 1.45E-02                 | 2.69                                   | 4.98E-04                 |
| <i>1700067K01Rik</i>     | 1.66                               | 4.76E-03                 | 1.72                                | 7.78E-03                 | 1.88                                   | 1.87E-03                 |
| <i>1810009A15Rik</i>     | 1.98                               | 6.88E-03                 | 1.64                                | 3.48E-02                 | 2.21                                   | 3.06E-03                 |
| <i>1810014B01Rik</i>     | 1.33                               | 4.55E-06                 | 1.32                                | 1.34E-05                 | 1.74                                   | 3.56E-07                 |
| <i>1810034E14Rik</i>     | 2.05                               | 2.09E-04                 | 2.34                                | 1.85E-04                 | 3.02                                   | 6.78E-06                 |
| <i>1810041H14Rik</i>     | -1.66                              | 3.64E-04                 | -2.34                               | 6.06E-05                 | -1.80                                  | 1.72E-04                 |
| <i>1810049J17Rik</i>     | -1.22                              | 3.81E-03                 | -1.31                               | 5.14E-03                 | -1.33                                  | 1.96E-03                 |
| <i>1810055G02Rik</i>     | -1.46                              | 6.57E-07                 | -1.73                               | 4.45E-07                 | -2.48                                  | 7.07E-09                 |
| <i>1810062O18Rik</i>     | 1.29                               | 1.15E-03                 | 1.59                                | 5.56E-04                 | 1.18                                   | 1.95E-03                 |
| <i>2010016I18Rik</i>     | 2.38                               | 1.52E-08                 | 2.61                                | 2.07E-08                 | 2.95                                   | 1.48E-09                 |
| <i>2010300C02Rik</i>     | -1.01                              | 3.25E-02                 | -1.40                               | 1.03E-02                 | -1.25                                  | 9.83E-03                 |
| <i>2010315B03Rik</i>     | 1.58                               | 1.52E-06                 | 1.60                                | 3.71E-06                 | 2.11                                   | 9.88E-08                 |

|               |       |          |       |          |       |          |
|---------------|-------|----------|-------|----------|-------|----------|
| 2310002F09Rik | 2.87  | 8.25E-04 | 2.05  | 1.54E-02 | 2.89  | 7.04E-04 |
| 2310009A05Rik | 1.39  | 2.41E-05 | 1.36  | 7.44E-05 | 1.79  | 2.18E-06 |
| 2310026I22Rik | -1.83 | 2.49E-02 | -2.19 | 1.79E-02 | -2.44 | 4.45E-03 |
| 2310031A07Rik | -1.61 | 8.93E-04 | -2.35 | 1.12E-04 | -1.10 | 9.88E-03 |
| 2310033P09Rik | -1.14 | 6.86E-09 | -1.40 | 5.61E-09 | -1.31 | 1.00E-09 |
| 2410007B07Rik | 1.49  | 5.36E-04 | 1.90  | 2.03E-04 | 1.74  | 1.39E-04 |
| 2500004C02Rik | 1.16  | 4.53E-04 | 1.23  | 6.61E-04 | 1.53  | 4.10E-05 |
| 2510009E07Rik | 0.60  | 8.43E-04 | 1.09  | 1.75E-05 | 1.04  | 7.93E-06 |
| 2610005L07Rik | -1.07 | 4.43E-06 | -1.42 | 1.18E-06 | -1.00 | 6.43E-06 |
| 2610015P09Rik | 0.81  | 1.39E-04 | 1.07  | 3.63E-05 | 1.31  | 1.97E-06 |
| 2610035D17Rik | 1.32  | 7.06E-05 | 1.36  | 1.49E-04 | 1.93  | 2.34E-06 |
| 2610318N02Rik | -1.08 | 1.03E-03 | -1.55 | 1.55E-04 | -1.71 | 2.19E-05 |
| 2610507I01Rik | 1.36  | 8.43E-07 | 1.30  | 3.38E-06 | 1.52  | 2.37E-07 |
| 2700068H02Rik | 1.73  | 1.71E-02 | 2.33  | 5.79E-03 | 1.47  | 3.59E-02 |
| 2700081O15Rik | -0.92 | 9.31E-04 | -1.25 | 2.10E-04 | -1.23 | 8.08E-05 |
| 2700099C18Rik | -2.29 | 1.11E-05 | -2.76 | 6.28E-06 | -2.12 | 1.78E-05 |
| 2810002D19Rik | 1.50  | 2.74E-05 | 1.69  | 2.58E-05 | 1.68  | 8.35E-06 |
| 2810006K23Rik | 1.13  | 5.53E-05 | 1.73  | 4.00E-06 | 1.65  | 1.72E-06 |
| 2810039B14Rik | 1.68  | 1.26E-05 | 1.44  | 1.16E-04 | 1.51  | 2.54E-05 |
| 2810410L24Rik | 2.03  | 1.01E-04 | 2.05  | 2.32E-04 | 1.85  | 1.87E-04 |
| 2810414N06Rik | 2.18  | 1.47E-04 | 2.72  | 6.10E-05 | 2.42  | 5.27E-05 |
| 2810429I04Rik | -2.03 | 1.45E-03 | -2.67 | 4.45E-04 | -2.97 | 6.70E-05 |
| 2900005J15Rik | 1.78  | 5.69E-06 | 1.63  | 3.15E-05 | 1.65  | 8.55E-06 |
| 2900079G21Rik | -1.93 | 1.12E-02 | -1.91 | 2.16E-02 | -2.73 | 1.05E-03 |
| 3110001I22Rik | -2.92 | 1.60E-03 | -2.76 | 5.10E-03 | -2.70 | 2.55E-03 |
| 3110007F17Rik | 1.58  | 3.12E-04 | 1.06  | 1.06E-02 | 1.64  | 2.01E-04 |
| 3110009E18Rik | 1.83  | 1.02E-04 | 1.60  | 7.40E-04 | 2.07  | 3.18E-05 |
| 3110043O21Rik | -2.31 | 5.23E-07 | -2.90 | 2.39E-07 | -2.93 | 5.09E-08 |
| 3110052M02Rik | 1.23  | 9.06E-07 | 1.23  | 2.48E-06 | 1.45  | 1.63E-07 |
| 3110062M04Rik | 1.48  | 4.89E-06 | 2.03  | 9.96E-07 | 2.04  | 2.48E-07 |
| 3632454L22Rik | 2.43  | 3.36E-06 | 2.32  | 1.34E-05 | 3.21  | 2.33E-07 |
| 3830406C13Rik | 0.62  | 1.59E-04 | 1.02  | 6.30E-06 | 1.14  | 7.04E-07 |
| 3830408C21Rik | 1.84  | 7.13E-04 | 1.80  | 1.93E-03 | 2.67  | 3.06E-05 |
| 4632404H12Rik | 1.21  | 1.96E-07 | 1.59  | 7.53E-08 | 1.31  | 6.68E-08 |
| 4831440E17Rik | 1.46  | 5.72E-04 | 1.21  | 4.82E-03 | 1.96  | 4.56E-05 |
| 4833422C13Rik | 1.25  | 2.76E-05 | 1.10  | 2.07E-04 | 2.77  | 2.67E-08 |
| 4930412L05Rik | -1.59 | 8.53E-03 | -2.09 | 3.13E-03 | -1.53 | 9.88E-03 |
| 4930422M22Rik | 2.04  | 2.82E-03 | 2.77  | 7.18E-04 | 2.31  | 1.07E-03 |

|               |       |          |       |          |       |          |
|---------------|-------|----------|-------|----------|-------|----------|
| 4930427A07Rik | -2.02 | 6.00E-05 | -2.43 | 3.43E-05 | -1.98 | 5.95E-05 |
| 4930430F08Rik | 1.77  | 2.16E-06 | 1.51  | 2.23E-05 | 2.10  | 3.79E-07 |
| 4930453N24Rik | 1.56  | 2.26E-09 | 1.74  | 3.36E-09 | 1.59  | 5.16E-10 |
| 4930458D05Rik | -1.41 | 3.24E-02 | -2.28 | 4.12E-03 | -1.49 | 2.33E-02 |
| 4930469K13Rik | 1.78  | 1.92E-03 | 1.64  | 7.03E-03 | 1.92  | 1.02E-03 |
| 4930473A02Rik | 0.60  | 3.18E-02 | 1.26  | 6.33E-04 | 1.04  | 1.02E-03 |
| 4930486L24Rik | -1.54 | 3.82E-03 | -1.79 | 3.00E-03 | -1.35 | 7.87E-03 |
| 4930502E09Rik | 1.63  | 4.14E-02 | 2.35  | 1.14E-02 | 2.30  | 6.14E-03 |
| 4930509E16Rik | 2.95  | 9.74E-04 | 2.16  | 1.53E-02 | 2.74  | 1.52E-03 |
| 4930512H18Rik | 1.64  | 2.72E-03 | 2.34  | 4.60E-04 | 2.75  | 4.38E-05 |
| 4930516B21Rik | 3.38  | 1.27E-05 | 2.06  | 1.60E-03 | 3.61  | 5.90E-06 |
| 4930526L06Rik | 1.44  | 2.42E-02 | 2.35  | 2.56E-03 | 2.10  | 2.30E-03 |
| 4930539E08Rik | 1.41  | 1.53E-03 | 1.35  | 4.46E-03 | 1.45  | 1.11E-03 |
| 4930579G24Rik | -1.21 | 4.91E-05 | -1.44 | 2.90E-05 | -1.25 | 2.98E-05 |
| 4930581F22Rik | 1.89  | 4.46E-08 | 1.93  | 9.43E-08 | 1.96  | 1.75E-08 |
| 4930594M22Rik | 2.24  | 2.90E-03 | 1.80  | 2.10E-02 | 1.71  | 1.37E-02 |
| 4931406C07Rik | 0.90  | 3.64E-05 | 1.33  | 3.80E-06 | 1.14  | 3.98E-06 |
| 4931414P19Rik | 0.94  | 2.56E-04 | 1.67  | 5.58E-06 | 1.81  | 7.74E-07 |
| 4933404O12Rik | 1.90  | 4.36E-08 | 2.12  | 5.25E-08 | 1.88  | 2.51E-08 |
| 4933408B17Rik | 2.74  | 7.46E-05 | 2.78  | 1.68E-04 | 3.37  | 1.10E-05 |
| 4933408J17Rik | -2.28 | 7.45E-03 | -1.95 | 3.20E-02 | -2.76 | 1.92E-03 |
| 4933427D14Rik | 1.06  | 1.15E-07 | 1.40  | 4.51E-08 | 1.32  | 1.29E-08 |
| 4933439C10Rik | 1.20  | 1.65E-03 | 0.99  | 1.21E-02 | 1.00  | 5.14E-03 |
| 4933439K11Rik | 1.83  | 1.60E-02 | 1.97  | 1.95E-02 | 1.89  | 1.23E-02 |
| 5330426P16Rik | 1.40  | 9.67E-08 | 1.60  | 9.78E-08 | 1.54  | 2.75E-08 |
| 5430403G16Rik | 1.48  | 1.83E-07 | 1.31  | 1.28E-06 | 1.71  | 3.66E-08 |
| 5430405H02Rik | -1.01 | 1.80E-07 | -1.06 | 3.44E-07 | -1.11 | 5.71E-08 |
| 5730508B09Rik | -1.25 | 3.14E-06 | -1.30 | 6.19E-06 | -1.24 | 2.77E-06 |
| 5830428H23Rik | 1.59  | 2.51E-08 | 1.69  | 4.35E-08 | 1.83  | 4.45E-09 |
| 5830468F06Rik | 2.70  | 8.78E-05 | 3.21  | 5.46E-05 | 2.46  | 1.65E-04 |
| 6030443J06Rik | 1.90  | 8.62E-06 | 1.44  | 2.21E-04 | 2.17  | 2.13E-06 |
| 6030458C11Rik | 1.18  | 4.50E-07 | 1.29  | 5.95E-07 | 1.29  | 1.52E-07 |
| 6330418K02Rik | 0.72  | 4.93E-03 | 1.18  | 3.19E-04 | 1.22  | 8.70E-05 |
| 6330419J24Rik | -2.38 | 2.63E-03 | -3.40 | 4.62E-04 | -3.23 | 2.46E-04 |
| 6330549D23Rik | 1.31  | 1.34E-02 | 1.47  | 1.31E-02 | 1.68  | 2.61E-03 |
| 6430571L13Rik | -1.62 | 1.41E-03 | -1.51 | 5.01E-03 | -2.04 | 2.20E-04 |
| 6530409C15Rik | 1.16  | 1.51E-05 | 1.25  | 2.24E-05 | 1.49  | 1.47E-06 |
| 9230114K14Rik | -2.41 | 5.58E-07 | -2.66 | 6.82E-07 | -2.89 | 8.68E-08 |

|                      |       |          |       |          |       |          |
|----------------------|-------|----------|-------|----------|-------|----------|
| <i>9330151L19Rik</i> | 1.18  | 1.15E-06 | 1.31  | 1.38E-06 | 1.06  | 2.16E-06 |
| <i>9330161L09Rik</i> | -2.33 | 1.18E-05 | -1.70 | 4.06E-04 | -1.67 | 1.66E-04 |
| <i>9330175E14Rik</i> | 1.55  | 3.35E-09 | 1.74  | 4.39E-09 | 2.76  | 3.59E-11 |
| <i>9430038I01Rik</i> | -0.86 | 2.82E-04 | -1.34 | 2.01E-05 | -1.42 | 3.78E-06 |
| <i>9830147E19Rik</i> | 2.23  | 1.23E-04 | 1.71  | 2.19E-03 | 1.76  | 7.23E-04 |
| <i>A230056P14Rik</i> | 4.21  | 5.96E-05 | 4.55  | 8.16E-05 | 3.29  | 3.79E-04 |
| <i>A330017A19Rik</i> | 1.36  | 9.72E-03 | 1.85  | 2.93E-03 | 1.43  | 6.70E-03 |
| <i>A430046D13Rik</i> | 1.42  | 1.92E-07 | 1.66  | 1.59E-07 | 2.01  | 8.56E-09 |
| <i>A430105I19Rik</i> | 1.74  | 2.51E-05 | 2.44  | 4.00E-06 | 2.30  | 1.86E-06 |
| <i>A530072M11Rik</i> | 1.01  | 9.93E-04 | 1.38  | 2.20E-04 | 1.78  | 8.32E-06 |
| <i>A530083I20Rik</i> | 1.39  | 1.62E-06 | 1.19  | 1.61E-05 | 2.15  | 3.08E-08 |
| <i>A630023P12Rik</i> | 1.01  | 1.16E-06 | 0.98  | 4.15E-06 | 1.71  | 1.22E-08 |
| <i>A930005H10Rik</i> | 1.09  | 4.67E-07 | 1.19  | 6.19E-07 | 1.39  | 4.27E-08 |
| <i>A930007I19Rik</i> | -1.51 | 1.78E-05 | -1.31 | 1.53E-04 | -1.16 | 1.40E-04 |
| <i>A930024E05Rik</i> | -2.64 | 2.86E-06 | -2.64 | 7.97E-06 | -2.00 | 2.52E-05 |
| <i>Aaed1</i>         | 1.20  | 1.33E-07 | 1.04  | 1.01E-06 | 1.57  | 9.97E-09 |
| <i>Aar2</i>          | -0.94 | 1.43E-07 | -1.02 | 1.99E-07 | -1.13 | 2.17E-08 |
| <i>Aars</i>          | -1.08 | 1.81E-07 | -1.07 | 5.14E-07 | -1.16 | 6.38E-08 |
| <i>Aasdh</i>         | 0.71  | 1.82E-06 | 1.00  | 3.02E-07 | 1.10  | 3.45E-08 |
| <i>Abca1</i>         | -2.29 | 3.04E-05 | -2.99 | 8.63E-06 | -2.57 | 9.43E-06 |
| <i>Abca5</i>         | -1.47 | 3.89E-04 | -1.40 | 1.33E-03 | -1.42 | 4.49E-04 |
| <i>Abcb11</i>        | 3.08  | 1.14E-06 | 3.80  | 5.66E-07 | 2.81  | 1.93E-06 |
| <i>Abcb1a</i>        | -2.33 | 1.48E-06 | -2.75 | 1.07E-06 | -2.57 | 4.80E-07 |
| <i>Abcb1b</i>        | -1.54 | 1.53E-06 | -1.46 | 6.69E-06 | -1.80 | 3.13E-07 |
| <i>Abcb4</i>         | -1.89 | 1.69E-04 | -1.35 | 4.55E-03 | -1.71 | 3.33E-04 |
| <i>Abcb9</i>         | -1.90 | 2.16E-06 | -2.01 | 3.68E-06 | -2.42 | 2.05E-07 |
| <i>Abcd4</i>         | 1.08  | 5.66E-07 | 1.11  | 1.19E-06 | 1.20  | 1.57E-07 |
| <i>Abcg1</i>         | -1.71 | 2.00E-08 | -2.02 | 1.75E-08 | -2.23 | 1.44E-09 |
| <i>Abcg4</i>         | 1.55  | 5.55E-03 | 2.46  | 4.97E-04 | 1.85  | 1.55E-03 |
| <i>Abhd14a</i>       | 1.79  | 4.85E-07 | 1.75  | 1.59E-06 | 1.14  | 1.70E-05 |
| <i>Abhd14b</i>       | 1.32  | 8.19E-07 | 1.50  | 7.77E-07 | 1.52  | 1.80E-07 |
| <i>Abi2</i>          | -1.25 | 3.80E-07 | -1.23 | 1.16E-06 | -1.23 | 2.88E-07 |
| <i>Abl2</i>          | -1.16 | 5.68E-08 | -1.25 | 9.10E-08 | -1.43 | 7.19E-09 |
| <i>Acaa1a</i>        | 1.05  | 7.08E-08 | 1.17  | 8.59E-08 | 1.23  | 1.22E-08 |
| <i>Acacb</i>         | -2.08 | 4.37E-04 | -1.83 | 2.58E-03 | -2.85 | 2.88E-05 |
| <i>Acad12</i>        | 1.35  | 7.72E-05 | 0.83  | 6.58E-03 | 1.61  | 1.46E-05 |
| <i>Acadsb</i>        | 2.01  | 2.40E-05 | 2.51  | 1.01E-05 | 1.82  | 4.65E-05 |
| <i>Acbd5</i>         | -1.41 | 3.91E-07 | -1.48 | 7.08E-07 | -1.50 | 1.66E-07 |

|                 |       |          |       |          |       |          |
|-----------------|-------|----------|-------|----------|-------|----------|
| <i>Acer2</i>    | -1.39 | 8.67E-08 | -1.52 | 1.20E-07 | -2.10 | 2.50E-09 |
| <i>Acot13</i>   | 1.24  | 1.24E-06 | 1.37  | 1.48E-06 | 1.41  | 3.12E-07 |
| <i>Acot2</i>    | -1.62 | 1.96E-07 | -1.98 | 1.18E-07 | -1.77 | 6.28E-08 |
| <i>Acot7</i>    | -1.19 | 6.88E-03 | -1.10 | 2.04E-02 | -2.40 | 3.06E-05 |
| <i>Acox1</i>    | -1.18 | 3.19E-08 | -1.33 | 3.89E-08 | -1.45 | 3.65E-09 |
| <i>Acp5</i>     | 1.26  | 1.32E-08 | 1.24  | 3.52E-08 | 1.41  | 2.65E-09 |
| <i>Acrbp</i>    | 1.28  | 5.77E-06 | 1.69  | 1.60E-06 | 1.72  | 3.70E-07 |
| <i>Acs11</i>    | -0.92 | 8.54E-08 | -1.10 | 6.55E-08 | -1.44 | 1.98E-09 |
| <i>Acs13</i>    | -1.70 | 1.81E-07 | -1.81 | 2.90E-07 | -2.26 | 1.25E-08 |
| <i>Acsm3</i>    | 1.93  | 1.47E-02 | 2.67  | 4.11E-03 | 2.49  | 2.82E-03 |
| <i>Acss1</i>    | 1.09  | 2.79E-08 | 0.91  | 2.49E-07 | 1.55  | 1.25E-09 |
| <i>Actb</i>     | 1.55  | 8.72E-09 | 1.59  | 1.82E-08 | 1.25  | 1.61E-08 |
| <i>Actrt3</i>   | -2.77 | 9.42E-04 | -3.25 | 6.63E-04 | -2.04 | 6.78E-03 |
| <i>Acvr2a</i>   | -1.22 | 3.64E-07 | -1.19 | 1.26E-06 | -1.76 | 1.39E-08 |
| <i>Acvr2b</i>   | 1.47  | 3.21E-03 | 1.70  | 2.51E-03 | 1.14  | 1.38E-02 |
| <i>Acyp1</i>    | 1.08  | 5.87E-07 | 1.17  | 8.24E-07 | 1.49  | 2.91E-08 |
| <i>Adam22</i>   | 1.72  | 3.72E-07 | 2.25  | 1.28E-07 | 2.04  | 6.22E-08 |
| <i>Adam8</i>    | 1.55  | 2.73E-03 | 1.90  | 1.46E-03 | 1.68  | 1.44E-03 |
| <i>Adamts14</i> | -1.93 | 1.22E-05 | -2.37 | 5.83E-06 | -2.45 | 1.23E-06 |
| <i>Adamts3</i>  | -2.60 | 7.64E-04 | -2.81 | 1.01E-03 | -3.46 | 6.99E-05 |
| <i>Adamts14</i> | 4.42  | 9.89E-09 | 4.92  | 1.27E-08 | 2.45  | 4.10E-07 |
| <i>Adap1</i>    | -1.60 | 1.76E-02 | -1.77 | 1.90E-02 | -1.53 | 2.07E-02 |
| <i>Adat1</i>    | 1.60  | 5.62E-08 | 2.06  | 2.83E-08 | 2.09  | 4.40E-09 |
| <i>Adcy5</i>    | 1.08  | 6.79E-03 | 1.95  | 2.27E-04 | 1.19  | 3.33E-03 |
| <i>Adcy6</i>    | 1.21  | 1.44E-08 | 1.25  | 2.89E-08 | 1.42  | 2.03E-09 |
| <i>Add1</i>     | 1.14  | 3.79E-11 | 1.10  | 1.97E-10 | 1.41  | 1.81E-12 |
| <i>Adgrg1</i>   | -1.81 | 3.01E-02 | -1.98 | 3.38E-02 | -3.15 | 9.07E-04 |
| <i>Adgrg3</i>   | -1.63 | 4.82E-04 | -1.85 | 4.39E-04 | -3.59 | 5.03E-07 |
| <i>Adgrg5</i>   | -1.28 | 5.56E-04 | -1.41 | 6.43E-04 | -1.88 | 2.11E-05 |
| <i>Adgrl2</i>   | -3.20 | 2.69E-05 | -4.32 | 5.90E-06 | -5.32 | 2.72E-07 |
| <i>Adprh</i>    | 1.04  | 1.72E-06 | 1.11  | 2.76E-06 | 1.15  | 5.77E-07 |
| <i>Aebp2</i>    | -1.14 | 5.78E-08 | -1.30 | 6.39E-08 | -1.34 | 9.74E-09 |
| <i>Aff1</i>     | -2.34 | 7.74E-08 | -2.79 | 6.07E-08 | -2.72 | 1.42E-08 |
| <i>Aff4</i>     | -1.59 | 3.89E-08 | -1.75 | 5.03E-08 | -1.69 | 1.26E-08 |
| <i>Ager</i>     | 2.32  | 6.13E-09 | 2.48  | 1.01E-08 | 2.72  | 7.86E-10 |
| <i>Agfg2</i>    | 1.13  | 5.05E-08 | 1.13  | 1.30E-07 | 1.12  | 3.08E-08 |
| <i>Aggf1</i>    | -0.99 | 2.56E-07 | -1.11 | 2.77E-07 | -1.02 | 1.33E-07 |
| <i>Agpat9</i>   | -3.10 | 8.80E-05 | -4.35 | 1.40E-05 | -5.09 | 1.04E-06 |

|                 |       |          |       |          |       |          |
|-----------------|-------|----------|-------|----------|-------|----------|
| <i>Agrp</i>     | 2.08  | 4.36E-03 | 1.65  | 3.09E-02 | 2.88  | 3.72E-04 |
| <i>Ahnak</i>    | -1.79 | 1.34E-06 | -2.12 | 9.10E-07 | -2.06 | 3.02E-07 |
| <i>AI467606</i> | 1.40  | 1.67E-09 | 1.44  | 3.54E-09 | 1.85  | 7.74E-11 |
| <i>AI504432</i> | 1.57  | 1.52E-04 | 1.41  | 8.44E-04 | 1.54  | 1.57E-04 |
| <i>Aida</i>     | 0.93  | 1.51E-07 | 1.05  | 1.53E-07 | 2.06  | 3.39E-10 |
| <i>Aigl</i>     | -1.59 | 6.11E-07 | -2.02 | 2.48E-07 | -1.53 | 6.23E-07 |
| <i>Aim1</i>     | -1.19 | 8.54E-08 | -1.24 | 1.65E-07 | -2.32 | 4.67E-10 |
| <i>Aim1l</i>    | -1.14 | 1.35E-02 | -1.81 | 1.40E-03 | -1.21 | 8.72E-03 |
| <i>Airn</i>     | 1.57  | 2.28E-06 | 1.59  | 5.68E-06 | 1.49  | 2.81E-06 |
| <i>Ak6</i>      | -1.04 | 5.64E-07 | -0.99 | 2.44E-06 | -1.17 | 1.53E-07 |
| <i>Akap2</i>    | -1.33 | 1.19E-05 | -1.60 | 7.15E-06 | -1.92 | 4.06E-07 |
| <i>Akr1e1</i>   | 1.35  | 2.46E-06 | 1.47  | 3.48E-06 | 1.09  | 1.24E-05 |
| <i>Akr7a5</i>   | 1.10  | 2.17E-05 | 1.03  | 9.87E-05 | 1.06  | 2.54E-05 |
| <i>Aldh1l2</i>  | 2.04  | 4.00E-05 | 1.69  | 4.66E-04 | 2.69  | 3.05E-06 |
| <i>Alg6</i>     | 1.05  | 3.65E-05 | 1.31  | 1.51E-05 | 1.30  | 4.82E-06 |
| <i>Alkbh2</i>   | 1.16  | 4.62E-06 | 1.34  | 3.88E-06 | 1.38  | 8.15E-07 |
| <i>Als2cr12</i> | 1.64  | 6.31E-04 | 2.04  | 2.84E-04 | 1.56  | 8.32E-04 |
| <i>Amd1</i>     | -1.93 | 8.93E-07 | -2.44 | 3.75E-07 | -2.65 | 4.56E-08 |
| <i>Amd2</i>     | -2.45 | 2.20E-05 | -1.91 | 4.21E-04 | -2.01 | 9.72E-05 |
| <i>Amdhd2</i>   | 0.95  | 3.27E-05 | 1.04  | 4.20E-05 | 1.15  | 5.11E-06 |
| <i>Amigo1</i>   | 1.90  | 1.07E-06 | 1.71  | 7.16E-06 | 1.50  | 6.41E-06 |
| <i>Amn1</i>     | 1.28  | 1.46E-06 | 1.53  | 9.15E-07 | 1.75  | 7.93E-08 |
| <i>Ampd1</i>    | -1.20 | 1.49E-05 | -1.31 | 1.95E-05 | -1.84 | 3.03E-07 |
| <i>Amt</i>      | 2.05  | 3.33E-08 | 1.96  | 1.07E-07 | 2.13  | 1.26E-08 |
| <i>Amy1</i>     | 1.42  | 1.04E-04 | 1.43  | 2.55E-04 | 1.94  | 6.38E-06 |
| <i>Anapc7</i>   | -1.04 | 1.01E-08 | -1.09 | 1.75E-08 | -1.13 | 2.26E-09 |
| <i>Angptl6</i>  | 2.17  | 7.16E-06 | 2.30  | 1.22E-05 | 2.10  | 7.89E-06 |
| <i>Ankrd13c</i> | -1.39 | 2.55E-07 | -1.52 | 3.41E-07 | -1.41 | 1.56E-07 |
| <i>Ankrd13d</i> | 1.24  | 8.43E-07 | 1.20  | 2.93E-06 | 1.49  | 1.29E-07 |
| <i>Ankrd50</i>  | -2.24 | 3.03E-07 | -2.71 | 1.82E-07 | -2.89 | 2.58E-08 |
| <i>Ankrd53</i>  | 1.94  | 8.27E-04 | 1.63  | 5.88E-03 | 2.36  | 1.59E-04 |
| <i>Ankzf1</i>   | 0.98  | 1.03E-07 | 1.02  | 1.90E-07 | 1.35  | 5.37E-09 |
| <i>Anln</i>     | -1.07 | 2.13E-02 | -1.53 | 5.30E-03 | -2.08 | 2.21E-04 |
| <i>Anxa4</i>    | 1.82  | 1.80E-05 | 2.08  | 1.60E-05 | 1.41  | 1.34E-04 |
| <i>Anxa7</i>    | 1.01  | 1.13E-07 | 1.25  | 6.80E-08 | 1.28  | 1.13E-08 |
| <i>Ap1m2</i>    | -0.82 | 3.40E-04 | -1.42 | 1.01E-05 | -1.17 | 1.53E-05 |
| <i>Ap1s3</i>    | -1.04 | 4.68E-06 | -0.97 | 2.34E-05 | -1.08 | 2.85E-06 |
| <i>Ap3s2</i>    | 0.98  | 2.36E-08 | 1.13  | 2.37E-08 | 1.14  | 3.78E-09 |

|                 |       |          |       |          |       |          |
|-----------------|-------|----------|-------|----------|-------|----------|
| <i>Ap5b1</i>    | 1.31  | 5.63E-07 | 1.12  | 5.70E-06 | 1.66  | 5.39E-08 |
| <i>Apbb1</i>    | 1.71  | 2.03E-05 | 1.68  | 6.23E-05 | 1.52  | 4.65E-05 |
| <i>Apcdd1</i>   | -2.17 | 1.58E-02 | -2.28 | 2.23E-02 | -3.66 | 4.46E-04 |
| <i>Apex1</i>    | -1.43 | 7.69E-08 | -1.64 | 7.76E-08 | -2.42 | 1.04E-09 |
| <i>Aph1b</i>    | -1.14 | 1.98E-02 | -1.18 | 2.91E-02 | -1.68 | 1.62E-03 |
| <i>Aplf</i>     | 1.14  | 5.26E-06 | 1.40  | 2.61E-06 | 1.32  | 1.20E-06 |
| <i>Apmap</i>    | -1.07 | 2.80E-08 | -1.22 | 2.94E-08 | -1.18 | 6.96E-09 |
| <i>Apobec2</i>  | 1.42  | 1.18E-03 | 1.85  | 3.89E-04 | 1.99  | 7.27E-05 |
| <i>Apobec3</i>  | 1.07  | 5.30E-07 | 1.16  | 7.27E-07 | 2.15  | 1.83E-09 |
| <i>Apol8</i>    | -3.22 | 8.42E-05 | -3.47 | 1.17E-04 | -4.47 | 4.32E-06 |
| <i>Apol9a</i>   | -2.98 | 1.68E-03 | -3.64 | 9.05E-04 | -3.06 | 1.25E-03 |
| <i>Apol9b</i>   | -3.05 | 3.08E-05 | -3.54 | 2.37E-05 | -2.66 | 8.48E-05 |
| <i>Appbp2</i>   | -1.04 | 1.47E-07 | -1.08 | 2.97E-07 | -1.20 | 2.96E-08 |
| <i>Arc</i>      | -1.36 | 5.13E-05 | -1.49 | 6.36E-05 | -2.03 | 1.38E-06 |
| <i>Areg</i>     | -3.08 | 4.63E-06 | -1.96 | 4.97E-04 | -3.02 | 4.47E-06 |
| <i>Arf4</i>     | -1.61 | 1.19E-07 | -1.83 | 1.24E-07 | -2.00 | 1.36E-08 |
| <i>Arhgap12</i> | 1.78  | 2.12E-09 | 1.87  | 3.71E-09 | 1.30  | 4.52E-09 |
| <i>Arhgap17</i> | -1.00 | 4.43E-08 | -1.14 | 4.63E-08 | -1.23 | 5.36E-09 |
| <i>Arhgap20</i> | -2.83 | 4.52E-04 | -1.97 | 1.13E-02 | -2.48 | 1.10E-03 |
| <i>Arhgef10</i> | -2.70 | 5.13E-06 | -3.72 | 9.94E-07 | -1.66 | 2.57E-04 |
| <i>Arhgef5</i>  | -1.12 | 4.38E-04 | -1.20 | 6.07E-04 | -1.23 | 1.88E-04 |
| <i>Arid4b</i>   | -1.08 | 9.57E-08 | -1.05 | 3.02E-07 | -1.09 | 5.26E-08 |
| <i>Arid5a</i>   | -1.28 | 4.09E-08 | -1.45 | 4.55E-08 | -1.55 | 5.25E-09 |
| <i>Arih1</i>    | -1.00 | 2.79E-08 | -1.05 | 5.10E-08 | -1.08 | 8.17E-09 |
| <i>Arih2</i>    | -1.23 | 1.01E-08 | -1.33 | 1.55E-08 | -1.24 | 3.88E-09 |
| <i>Arl10</i>    | 2.89  | 3.43E-08 | 2.99  | 6.80E-08 | 2.92  | 1.62E-08 |
| <i>Arl3</i>     | 1.17  | 6.69E-07 | 1.30  | 7.52E-07 | 1.20  | 3.87E-07 |
| <i>Arl4d</i>    | -1.57 | 1.42E-03 | -1.29 | 1.07E-02 | -1.63 | 9.81E-04 |
| <i>Arl5b</i>    | -2.08 | 8.98E-07 | -2.53 | 5.10E-07 | -2.67 | 8.00E-08 |
| <i>Arl8b</i>    | -1.19 | 2.39E-07 | -1.37 | 2.26E-07 | -1.41 | 4.02E-08 |
| <i>Armc3</i>    | 0.80  | 3.15E-03 | 1.54  | 5.20E-05 | 1.59  | 1.24E-05 |
| <i>Armcx1</i>   | -0.90 | 2.88E-03 | -1.16 | 1.11E-03 | -1.90 | 6.52E-06 |
| <i>Armcx4</i>   | -2.29 | 1.27E-05 | -2.80 | 6.39E-06 | -4.27 | 5.00E-08 |
| <i>Armcx5</i>   | -1.58 | 4.30E-04 | -1.78 | 4.19E-04 | -2.29 | 1.72E-05 |
| <i>Armcx6</i>   | -1.01 | 1.70E-03 | -1.15 | 1.52E-03 | -1.70 | 2.28E-05 |
| <i>Arntl2</i>   | 1.88  | 9.46E-03 | 1.91  | 1.64E-02 | 1.61  | 2.11E-02 |
| <i>Arpcla</i>   | -0.94 | 9.42E-09 | -1.03 | 1.33E-08 | -1.11 | 1.28E-09 |
| <i>Arrdc3</i>   | -1.00 | 2.01E-06 | -1.10 | 2.49E-06 | -1.10 | 6.69E-07 |

|                   |       |          |       |          |       |          |
|-------------------|-------|----------|-------|----------|-------|----------|
| <i>Arsk</i>       | 1.51  | 4.44E-07 | 1.58  | 8.23E-07 | 2.00  | 3.03E-08 |
| <i>Art2b</i>      | 2.45  | 8.03E-09 | 3.13  | 5.57E-09 | 4.48  | 7.35E-11 |
| <i>Art5</i>       | -1.47 | 2.41E-02 | -1.87 | 1.22E-02 | -2.18 | 2.04E-03 |
| <i>Asah1</i>      | 1.03  | 6.13E-09 | 1.04  | 1.33E-08 | 1.02  | 2.43E-09 |
| <i>Ascl3</i>      | 1.33  | 2.14E-03 | 1.71  | 8.13E-04 | 1.80  | 1.98E-04 |
| <i>Asfla</i>      | -1.07 | 1.18E-04 | -1.46 | 2.34E-05 | -1.04 | 1.30E-04 |
| <i>Asgr1</i>      | -1.96 | 1.80E-02 | -1.87 | 3.93E-02 | -3.23 | 6.32E-04 |
| <i>Aspm</i>       | -2.30 | 2.80E-05 | -2.40 | 5.34E-05 | -2.63 | 7.39E-06 |
| <i>Asrgl1</i>     | 1.47  | 4.52E-08 | 1.59  | 6.80E-08 | 1.66  | 9.77E-09 |
| <i>Atad2</i>      | -1.87 | 2.49E-07 | -2.18 | 2.13E-07 | -2.11 | 6.27E-08 |
| <i>Atad3aos</i>   | 1.15  | 4.69E-04 | 1.07  | 1.87E-03 | 1.36  | 1.07E-04 |
| <i>Atad5</i>      | -1.92 | 5.20E-07 | -2.20 | 4.84E-07 | -3.37 | 4.53E-09 |
| <i>Atcay</i>      | -1.01 | 9.10E-03 | -1.37 | 2.64E-03 | -1.56 | 4.05E-04 |
| <i>Atf1</i>       | -0.96 | 1.18E-07 | -1.07 | 1.47E-07 | -1.09 | 2.71E-08 |
| <i>Atf3</i>       | -3.12 | 2.45E-04 | -4.49 | 3.27E-05 | -4.84 | 5.27E-06 |
| <i>Atf4</i>       | -1.05 | 9.22E-07 | -1.13 | 1.35E-06 | -1.35 | 8.24E-08 |
| <i>Atf5</i>       | -0.88 | 3.20E-03 | -1.18 | 9.70E-04 | -1.03 | 9.67E-04 |
| <i>Atg101</i>     | -1.03 | 1.08E-06 | -1.27 | 5.65E-07 | -1.16 | 3.02E-07 |
| <i>Atg14</i>      | -1.28 | 3.98E-08 | -1.39 | 5.60E-08 | -1.11 | 6.22E-08 |
| <i>Atg2a</i>      | -1.20 | 4.17E-08 | -1.40 | 3.98E-08 | -1.31 | 1.16E-08 |
| <i>Atg7</i>       | -1.56 | 2.90E-08 | -1.63 | 5.47E-08 | -1.49 | 2.03E-08 |
| <i>Atl2</i>       | -1.46 | 3.72E-07 | -1.69 | 3.09E-07 | -1.72 | 6.66E-08 |
| <i>Atpla2</i>     | -2.13 | 3.83E-05 | -1.29 | 4.09E-03 | -2.41 | 1.15E-05 |
| <i>Atp6v0d1</i>   | -1.37 | 2.41E-08 | -1.47 | 3.87E-08 | -1.41 | 9.08E-09 |
| <i>Atp6v0e2</i>   | -1.48 | 6.56E-03 | -1.26 | 2.99E-02 | -1.75 | 1.97E-03 |
| <i>Atp6v1e1</i>   | -1.41 | 1.75E-08 | -1.49 | 2.97E-08 | -1.51 | 4.89E-09 |
| <i>Atp6v1g2</i>   | 1.04  | 4.25E-03 | 1.83  | 1.52E-04 | 1.61  | 1.51E-04 |
| <i>Atp6v1h</i>    | -1.09 | 2.00E-08 | -1.17 | 3.04E-08 | -1.43 | 1.42E-09 |
| <i>Atxn7llos2</i> | 1.10  | 3.67E-08 | 0.87  | 4.96E-07 | 1.11  | 1.71E-08 |
| <i>AU020206</i>   | 1.33  | 2.10E-07 | 1.52  | 2.05E-07 | 1.63  | 2.71E-08 |
| <i>AU022252</i>   | 0.94  | 1.43E-07 | 1.06  | 1.53E-07 | 1.10  | 2.68E-08 |
| <i>Aurka</i>      | -0.99 | 5.58E-03 | -1.21 | 3.17E-03 | -1.15 | 1.92E-03 |
| <i>AV099323</i>   | 1.55  | 1.57E-02 | 2.07  | 5.45E-03 | 2.81  | 2.38E-04 |
| <i>Avil</i>       | 1.30  | 3.42E-05 | 1.47  | 3.17E-05 | 3.07  | 1.96E-08 |
| <i>Avl9</i>       | -1.50 | 2.33E-07 | -1.71 | 2.29E-07 | -1.66 | 6.71E-08 |
| <i>AW146154</i>   | 1.96  | 2.49E-03 | 2.35  | 1.59E-03 | 2.37  | 5.75E-04 |
| <i>Axl</i>        | -2.54 | 2.23E-04 | -3.12 | 1.08E-04 | -2.74 | 1.06E-04 |
| <i>Azin1</i>      | -1.34 | 1.60E-07 | -1.54 | 1.47E-07 | -1.54 | 3.32E-08 |



|                      |       |          |       |          |       |          |
|----------------------|-------|----------|-------|----------|-------|----------|
| <i>B130034C11Rik</i> | 2.62  | 7.33E-08 | 2.60  | 1.98E-07 | 2.88  | 2.04E-08 |
| <i>B3galnt2</i>      | 1.10  | 3.38E-07 | 1.18  | 5.19E-07 | 1.15  | 1.63E-07 |
| <i>B3gnt3</i>        | 1.26  | 5.82E-04 | 1.26  | 1.36E-03 | 1.76  | 3.46E-05 |
| <i>B3gnt5</i>        | 1.12  | 1.22E-06 | 1.23  | 1.54E-06 | 2.62  | 1.35E-09 |
| <i>B3gnt7</i>        | -1.81 | 9.65E-03 | -1.85 | 1.64E-02 | -1.42 | 3.29E-02 |
| <i>B3gnt9</i>        | 1.54  | 9.11E-04 | 1.65  | 1.29E-03 | 1.61  | 5.89E-04 |
| <i>B430212C06Rik</i> | 1.54  | 9.26E-04 | 1.96  | 3.50E-04 | 1.84  | 2.10E-04 |
| <i>B4galnt1</i>      | -1.19 | 1.54E-08 | -1.34 | 1.81E-08 | -1.29 | 3.88E-09 |
| <i>B630019A10Rik</i> | 1.05  | 2.93E-07 | 1.06  | 7.20E-07 | 2.48  | 4.13E-10 |
| <i>Bace1</i>         | 1.45  | 1.40E-07 | 1.80  | 7.72E-08 | 1.75  | 1.96E-08 |
| <i>Bach1</i>         | -1.26 | 3.73E-07 | -1.37 | 5.15E-07 | -1.10 | 8.16E-07 |
| <i>Bach2it1</i>      | -1.59 | 3.07E-03 | -2.05 | 1.16E-03 | -1.39 | 6.75E-03 |
| <i>Bag3</i>          | -1.40 | 1.72E-05 | -1.63 | 1.36E-05 | -1.21 | 5.09E-05 |
| <i>Bag4</i>          | -1.04 | 2.89E-05 | -1.19 | 2.56E-05 | -1.12 | 1.24E-05 |
| <i>Baiap2</i>        | -1.54 | 1.38E-07 | -1.95 | 6.90E-08 | -2.06 | 9.08E-09 |
| <i>Bambi</i>         | -1.96 | 7.07E-04 | -2.45 | 3.09E-04 | -2.99 | 1.94E-05 |
| <i>Banp</i>          | 1.20  | 7.31E-06 | 1.08  | 4.85E-05 | 1.41  | 1.49E-06 |
| <i>Bap1</i>          | -1.03 | 3.19E-08 | -1.05 | 7.19E-08 | -1.04 | 1.48E-08 |
| <i>Baspl</i>         | -1.13 | 3.45E-05 | -1.38 | 1.63E-05 | -1.51 | 2.23E-06 |
| <i>Batf</i>          | -1.44 | 1.98E-05 | -1.66 | 1.68E-05 | -1.59 | 7.27E-06 |
| <i>Bbs10</i>         | 1.45  | 2.48E-07 | 1.29  | 1.76E-06 | 2.02  | 1.22E-08 |
| <i>BC017158</i>      | 1.12  | 2.64E-07 | 1.03  | 1.41E-06 | 1.02  | 4.05E-07 |
| <i>BC025920</i>      | 1.97  | 1.10E-06 | 2.09  | 1.88E-06 | 2.57  | 8.62E-08 |
| <i>BC030499</i>      | 1.12  | 8.83E-04 | 1.33  | 6.00E-04 | 1.53  | 6.63E-05 |
| <i>BC049352</i>      | 1.64  | 3.94E-04 | 2.28  | 7.22E-05 | 1.01  | 1.00E-02 |
| <i>BC051226</i>      | 1.37  | 2.19E-06 | 1.61  | 1.59E-06 | 1.93  | 8.68E-08 |
| <i>BC068281</i>      | 1.26  | 5.10E-07 | 1.64  | 1.82E-07 | 1.37  | 1.78E-07 |
| <i>BC094916</i>      | 1.25  | 7.45E-08 | 1.42  | 7.75E-08 | 2.60  | 2.79E-10 |
| <i>BC106179</i>      | 1.90  | 2.16E-02 | 1.94  | 3.40E-02 | 3.38  | 4.54E-04 |
| <i>BC147527</i>      | 2.08  | 7.26E-07 | 2.60  | 3.36E-07 | 3.15  | 1.76E-08 |
| <i>Bcar1</i>         | -2.29 | 1.39E-02 | -3.96 | 8.02E-04 | -2.86 | 3.21E-03 |
| <i>Bcat1</i>         | -2.24 | 2.40E-03 | -2.72 | 1.37E-03 | -3.04 | 2.18E-04 |
| <i>Bcl10</i>         | -1.51 | 1.08E-07 | -1.66 | 1.41E-07 | -1.69 | 2.64E-08 |
| <i>Bcl2a1a</i>       | -1.70 | 3.58E-03 | -1.62 | 9.82E-03 | -1.97 | 1.16E-03 |
| <i>Bcl2a1b</i>       | -2.31 | 1.45E-07 | -2.89 | 7.70E-08 | -2.86 | 1.68E-08 |
| <i>Bcl2l11</i>       | -1.08 | 8.57E-09 | -1.09 | 1.96E-08 | -1.94 | 8.35E-11 |
| <i>Bcl2l12</i>       | 1.44  | 1.66E-06 | 1.22  | 1.76E-05 | 1.27  | 3.84E-06 |
| <i>Bcl2l13</i>       | -1.32 | 2.96E-08 | -1.47 | 3.83E-08 | -1.60 | 3.77E-09 |

|                      |       |          |       |          |       |          |
|----------------------|-------|----------|-------|----------|-------|----------|
| <i>Bcl2l15</i>       | 1.46  | 2.71E-03 | 1.55  | 3.92E-03 | 1.97  | 2.56E-04 |
| <i>Bdkrb1</i>        | 2.00  | 5.79E-03 | 1.62  | 3.43E-02 | 1.98  | 5.65E-03 |
| <i>BE692007</i>      | 1.58  | 5.62E-08 | 1.94  | 3.73E-08 | 2.82  | 5.48E-10 |
| <i>Bend3</i>         | -2.10 | 4.12E-08 | -2.43 | 4.22E-08 | -3.05 | 1.56E-09 |
| <i>Bend4</i>         | -2.87 | 1.84E-05 | -4.13 | 2.36E-06 | -3.39 | 3.57E-06 |
| <i>Bend5</i>         | -2.08 | 4.23E-03 | -1.85 | 1.68E-02 | -2.46 | 1.24E-03 |
| <i>Bhlha15</i>       | 0.59  | 9.49E-04 | 1.45  | 1.78E-06 | 1.01  | 1.14E-05 |
| <i>Bhlhe40</i>       | -2.64 | 5.37E-07 | -3.60 | 1.36E-07 | -3.92 | 1.54E-08 |
| <i>Bhlhe41</i>       | -3.43 | 6.96E-05 | -4.55 | 1.74E-05 | -5.26 | 1.45E-06 |
| <i>Bin2</i>          | 1.17  | 9.14E-09 | 1.26  | 1.44E-08 | 1.04  | 8.28E-09 |
| <i>Blm</i>           | -1.81 | 2.41E-07 | -2.05 | 2.47E-07 | -2.03 | 6.35E-08 |
| <i>Bloc1s3</i>       | 1.13  | 3.53E-07 | 1.06  | 1.69E-06 | 1.40  | 4.36E-08 |
| <i>Blvrb</i>         | 1.02  | 9.39E-04 | 0.79  | 1.08E-02 | 1.54  | 2.89E-05 |
| <i>Bmp2k</i>         | -1.53 | 2.07E-07 | -1.56 | 4.66E-07 | -1.66 | 7.07E-08 |
| <i>Bpgm</i>          | -1.57 | 1.12E-06 | -1.67 | 1.85E-06 | -1.39 | 2.44E-06 |
| <i>Bpnt1</i>         | -1.40 | 7.13E-07 | -1.84 | 2.31E-07 | -1.82 | 5.92E-08 |
| <i>Brat1</i>         | 1.02  | 5.60E-09 | 1.08  | 8.67E-09 | 1.21  | 6.16E-10 |
| <i>Brcal</i>         | -1.54 | 2.83E-05 | -1.65 | 4.23E-05 | -1.11 | 3.42E-04 |
| <i>Brms1l</i>        | 0.99  | 3.17E-07 | 1.20  | 1.90E-07 | 1.26  | 3.00E-08 |
| <i>Bsdcl</i>         | -1.32 | 2.41E-08 | -1.52 | 2.43E-08 | -1.55 | 3.65E-09 |
| <i>Btaf1</i>         | -1.04 | 3.01E-08 | -1.04 | 7.36E-08 | -1.13 | 7.90E-09 |
| <i>Btbd10</i>        | -1.05 | 2.32E-06 | -1.07 | 5.33E-06 | -1.27 | 3.39E-07 |
| <i>Btg1</i>          | -1.22 | 1.24E-06 | -1.45 | 8.56E-07 | -1.18 | 1.26E-06 |
| <i>Btg2</i>          | -1.21 | 1.24E-06 | -1.43 | 8.39E-07 | -1.06 | 2.91E-06 |
| <i>Btg3</i>          | -1.20 | 1.31E-06 | -1.30 | 1.86E-06 | -1.79 | 3.31E-08 |
| <i>Btnl7-ps</i>      | 1.82  | 3.35E-05 | 1.66  | 1.88E-04 | 3.11  | 2.72E-07 |
| <i>Bud31</i>         | -1.12 | 4.60E-07 | -1.24 | 5.48E-07 | -1.31 | 8.69E-08 |
| <i>Bzw2</i>          | -1.30 | 4.31E-08 | -1.41 | 6.55E-08 | -1.98 | 1.20E-09 |
| <i>C030039L03Rik</i> | 0.94  | 2.05E-06 | 1.01  | 3.08E-06 | 1.18  | 2.18E-07 |
| <i>C130036L24Rik</i> | 1.89  | 3.98E-08 | 2.08  | 5.25E-08 | 2.08  | 1.01E-08 |
| <i>C130046K22Rik</i> | 1.21  | 1.02E-04 | 1.17  | 3.25E-04 | 1.51  | 1.36E-05 |
| <i>C1qtnf9</i>       | 1.28  | 6.17E-03 | 2.01  | 5.89E-04 | 1.33  | 4.39E-03 |
| <i>C230037L18Rik</i> | 1.93  | 5.65E-08 | 1.77  | 2.69E-07 | 2.13  | 1.49E-08 |
| <i>C230038L03Rik</i> | -2.49 | 6.44E-05 | -2.55 | 1.39E-04 | -3.70 | 1.79E-06 |
| <i>C230062I16Rik</i> | 2.41  | 3.95E-05 | 2.93  | 2.01E-05 | 2.48  | 2.55E-05 |
| <i>C2cd2</i>         | 1.12  | 2.41E-07 | 1.02  | 1.42E-06 | 1.02  | 3.70E-07 |
| <i>C330018D20Rik</i> | 0.93  | 3.39E-06 | 1.03  | 4.03E-06 | 1.52  | 4.14E-08 |
| <i>C330027C09Rik</i> | -2.57 | 1.95E-04 | -3.34 | 5.96E-05 | -3.42 | 1.53E-05 |

|                      |       |          |       |          |       |          |
|----------------------|-------|----------|-------|----------|-------|----------|
| <i>C430002N11Rik</i> | -2.85 | 8.14E-05 | -1.22 | 4.53E-02 | -1.26 | 2.08E-02 |
| <i>C77080</i>        | -1.79 | 1.67E-04 | -1.04 | 1.50E-02 | -1.74 | 1.77E-04 |
| <i>C920009B18Rik</i> | -2.58 | 2.05E-04 | -2.40 | 8.67E-04 | -2.83 | 8.39E-05 |
| <i>C920025E04Rik</i> | 1.17  | 3.76E-06 | 1.12  | 1.41E-05 | 1.39  | 6.30E-07 |
| <i>Cabp4</i>         | 0.78  | 3.36E-02 | 1.50  | 1.35E-03 | 1.42  | 7.94E-04 |
| <i>Cacna2d4</i>      | 1.79  | 6.03E-09 | 1.78  | 1.41E-08 | 2.20  | 5.47E-10 |
| <i>Cacnb3</i>        | 1.14  | 6.72E-05 | 0.72  | 4.96E-03 | 2.23  | 1.72E-07 |
| <i>Calca</i>         | -1.81 | 2.57E-04 | -1.96 | 3.45E-04 | -2.09 | 7.18E-05 |
| <i>Calm2</i>         | -1.02 | 1.84E-07 | -1.09 | 3.09E-07 | -1.16 | 4.22E-08 |
| <i>Camk2n1</i>       | 0.93  | 4.24E-04 | 1.38  | 4.53E-05 | 1.13  | 8.16E-05 |
| <i>Camsap2</i>       | -1.53 | 4.52E-08 | -1.74 | 4.88E-08 | -1.99 | 3.62E-09 |
| <i>Car11</i>         | 1.33  | 8.95E-05 | 0.90  | 4.01E-03 | 1.36  | 6.44E-05 |
| <i>Card9</i>         | 1.20  | 1.72E-06 | 0.84  | 8.85E-05 | 1.09  | 3.06E-06 |
| <i>Carhsp1</i>       | -1.00 | 1.75E-07 | -1.17 | 1.42E-07 | -1.08 | 5.98E-08 |
| <i>Carns1</i>        | 1.30  | 1.95E-08 | 1.28  | 5.09E-08 | 1.79  | 9.76E-10 |
| <i>Casc4</i>         | -1.67 | 3.66E-07 | -1.87 | 4.02E-07 | -2.39 | 1.47E-08 |
| <i>Casc5</i>         | -2.07 | 8.82E-06 | -2.09 | 2.19E-05 | -1.67 | 4.45E-05 |
| <i>Casp3</i>         | -1.26 | 4.41E-06 | -1.30 | 9.01E-06 | -1.99 | 6.87E-08 |
| <i>Casp9</i>         | 1.60  | 1.52E-08 | 1.56  | 4.27E-08 | 1.61  | 6.28E-09 |
| <i>Cass4</i>         | 1.02  | 1.44E-02 | 0.98  | 3.07E-02 | 1.76  | 3.15E-04 |
| <i>Casz1</i>         | -2.01 | 1.08E-07 | -2.48 | 6.52E-08 | -2.14 | 4.04E-08 |
| <i>Cbx5</i>          | 1.47  | 8.10E-09 | 1.59  | 1.22E-08 | 1.52  | 2.43E-09 |
| <i>Ccbl1</i>         | 1.17  | 3.53E-07 | 1.04  | 2.51E-06 | 1.02  | 7.93E-07 |
| <i>Ccdc101</i>       | 1.05  | 4.79E-07 | 1.14  | 6.93E-07 | 1.23  | 8.67E-08 |
| <i>Ccdc106</i>       | 0.98  | 3.85E-02 | 1.36  | 1.31E-02 | 1.58  | 2.34E-03 |
| <i>Ccdc107</i>       | 1.07  | 1.97E-06 | 1.04  | 6.75E-06 | 1.03  | 2.16E-06 |
| <i>Ccdc117</i>       | -1.96 | 3.97E-07 | -2.35 | 2.56E-07 | -2.23 | 9.19E-08 |
| <i>Ccdc136</i>       | 1.78  | 2.24E-02 | 2.16  | 1.46E-02 | 1.52  | 4.50E-02 |
| <i>Ccdc163</i>       | 1.32  | 1.72E-06 | 1.52  | 1.44E-06 | 1.58  | 2.83E-07 |
| <i>Ccdc167</i>       | 1.68  | 4.45E-04 | 1.91  | 4.02E-04 | 1.57  | 6.51E-04 |
| <i>Ccdc175</i>       | 1.60  | 3.51E-03 | 2.55  | 2.65E-04 | 1.30  | 1.16E-02 |
| <i>Ccdc18</i>        | 1.06  | 5.82E-04 | 0.65  | 2.70E-02 | 1.33  | 8.87E-05 |
| <i>Ccdc181</i>       | 0.89  | 1.04E-03 | 1.09  | 5.56E-04 | 1.72  | 4.10E-06 |
| <i>Ccdc186</i>       | -1.09 | 9.07E-07 | -1.12 | 1.93E-06 | -1.14 | 4.37E-07 |
| <i>Ccdc39</i>        | 1.18  | 4.37E-04 | 2.20  | 6.97E-06 | 1.81  | 1.10E-05 |
| <i>Ccdc51</i>        | 1.01  | 3.10E-05 | 1.16  | 2.66E-05 | 1.10  | 1.27E-05 |
| <i>Ccdc73</i>        | 1.35  | 3.26E-05 | 2.08  | 2.38E-06 | 1.79  | 2.42E-06 |
| <i>Ccdc8</i>         | -2.03 | 2.60E-02 | -2.19 | 3.16E-02 | -2.28 | 1.33E-02 |

|                 |       |          |       |          |       |          |
|-----------------|-------|----------|-------|----------|-------|----------|
| <i>Ccdc86</i>   | -0.98 | 5.35E-06 | -1.08 | 6.19E-06 | -1.44 | 1.50E-07 |
| <i>Ccin</i>     | 1.93  | 4.34E-03 | 3.36  | 1.76E-04 | 1.25  | 4.36E-02 |
| <i>Ccnb2</i>    | 2.11  | 3.78E-04 | 2.69  | 1.41E-04 | 2.90  | 2.40E-05 |
| <i>Ccne1</i>    | 2.20  | 3.01E-08 | 1.96  | 1.63E-07 | 2.50  | 6.22E-09 |
| <i>Ccne2</i>    | -2.16 | 2.46E-05 | -2.74 | 9.01E-06 | -2.78 | 2.31E-06 |
| <i>Ccnk</i>     | -1.17 | 2.37E-08 | -1.26 | 3.62E-08 | -1.23 | 7.94E-09 |
| <i>Ccno</i>     | -1.92 | 6.15E-03 | -1.99 | 9.74E-03 | -2.73 | 4.68E-04 |
| <i>Ccnt1</i>    | -1.23 | 6.50E-08 | -1.37 | 8.28E-08 | -1.35 | 1.83E-08 |
| <i>Ccnyl1</i>   | -1.37 | 1.10E-06 | -1.54 | 1.17E-06 | -1.70 | 1.31E-07 |
| <i>Ccpgl</i>    | -1.41 | 1.43E-07 | -1.70 | 9.92E-08 | -1.17 | 4.46E-07 |
| <i>Ccr2</i>     | -1.11 | 1.32E-03 | -1.24 | 1.35E-03 | -1.64 | 5.32E-05 |
| <i>Ccr4</i>     | -1.90 | 1.14E-04 | -2.06 | 1.55E-04 | -3.53 | 4.65E-07 |
| <i>Ccr7</i>     | -1.54 | 1.92E-08 | -1.84 | 1.60E-08 | -2.18 | 7.94E-10 |
| <i>Ccr8</i>     | -3.09 | 6.53E-04 | -4.58 | 7.31E-05 | -5.81 | 2.90E-06 |
| <i>Ccrl2</i>    | -1.89 | 1.19E-03 | -2.18 | 9.83E-04 | -1.55 | 4.17E-03 |
| <i>Cd164l2</i>  | -3.07 | 1.40E-05 | -2.69 | 1.12E-04 | -4.54 | 3.85E-07 |
| <i>Cd200r1</i>  | 1.62  | 4.53E-08 | 2.23  | 1.60E-08 | 1.56  | 3.43E-08 |
| <i>Cd24a</i>    | -2.42 | 7.32E-05 | -3.42 | 1.09E-05 | -3.88 | 1.05E-06 |
| <i>Cd44</i>     | -1.83 | 5.85E-07 | -2.20 | 3.59E-07 | -2.37 | 4.72E-08 |
| <i>Cd46</i>     | 1.41  | 5.24E-07 | 1.45  | 1.15E-06 | 2.00  | 2.13E-08 |
| <i>Cd47</i>     | 1.17  | 2.83E-09 | 1.19  | 6.05E-09 | 1.21  | 7.08E-10 |
| <i>Cd48</i>     | 1.75  | 1.04E-09 | 1.89  | 1.36E-09 | 1.27  | 1.57E-09 |
| <i>Cd69</i>     | -3.12 | 4.00E-05 | -4.27 | 7.72E-06 | -4.57 | 1.22E-06 |
| <i>Cd7</i>      | 1.11  | 9.06E-05 | 1.51  | 1.88E-05 | 1.76  | 1.43E-06 |
| <i>Cd83</i>     | -2.22 | 1.45E-04 | -2.79 | 5.79E-05 | -2.90 | 1.30E-05 |
| <i>Cd86</i>     | -2.51 | 1.89E-06 | -2.95 | 1.35E-06 | -1.74 | 3.47E-05 |
| <i>Cd9</i>      | 0.99  | 1.09E-06 | 1.11  | 1.17E-06 | 1.79  | 7.11E-09 |
| <i>Cdc20</i>    | -0.98 | 9.94E-05 | -1.34 | 2.06E-05 | -1.32 | 6.96E-06 |
| <i>Cdc25b</i>   | 2.18  | 5.89E-09 | 1.95  | 2.61E-08 | 2.96  | 3.00E-10 |
| <i>Cdc27</i>    | -1.27 | 1.73E-07 | -1.33 | 3.24E-07 | -1.51 | 2.89E-08 |
| <i>Cdc42sel</i> | 1.14  | 7.90E-10 | 1.26  | 1.11E-09 | 1.33  | 6.69E-11 |
| <i>Cdc45</i>    | -1.60 | 8.77E-05 | -1.30 | 1.10E-03 | -1.85 | 2.17E-05 |
| <i>Cdca2</i>    | -1.37 | 3.05E-05 | -0.91 | 1.84E-03 | -1.63 | 5.59E-06 |
| <i>Cdh1</i>     | -3.11 | 2.57E-04 | -3.05 | 7.28E-04 | -3.41 | 1.08E-04 |
| <i>Cdh23</i>    | 1.12  | 1.60E-06 | 0.94  | 1.91E-05 | 1.80  | 2.28E-08 |
| <i>Cdh24</i>    | -1.07 | 2.57E-06 | -0.92 | 2.43E-05 | -1.24 | 5.72E-07 |
| <i>Cdk11b</i>   | -1.50 | 3.01E-08 | -1.75 | 2.94E-08 | -1.78 | 4.43E-09 |
| <i>Cdk17</i>    | -1.09 | 4.36E-08 | -1.25 | 4.55E-08 | -1.04 | 3.40E-08 |

|                 |       |          |       |          |       |          |
|-----------------|-------|----------|-------|----------|-------|----------|
| <i>Cdkn1a</i>   | -3.16 | 1.98E-04 | -4.07 | 6.50E-05 | -5.15 | 2.60E-06 |
| <i>Cdkn2aip</i> | -1.11 | 2.29E-07 | -1.11 | 6.55E-07 | -1.09 | 1.81E-07 |
| <i>Cdo1</i>     | 0.75  | 3.29E-02 | 1.27  | 3.17E-03 | 1.34  | 8.92E-04 |
| <i>Cdpf1</i>    | 1.38  | 2.53E-07 | 1.18  | 2.54E-06 | 1.76  | 2.44E-08 |
| <i>Cdt1</i>     | -1.35 | 5.72E-07 | -1.63 | 3.42E-07 | -1.80 | 3.66E-08 |
| <i>Ceacam1</i>  | -1.38 | 9.48E-03 | -2.40 | 4.70E-04 | -1.10 | 2.91E-02 |
| <i>Cebpa</i>    | -1.09 | 2.81E-02 | -2.62 | 1.84E-04 | -1.89 | 8.35E-04 |
| <i>Cecr6</i>    | -1.13 | 3.18E-03 | -1.69 | 3.87E-04 | -1.43 | 5.35E-04 |
| <i>Celf3</i>    | 1.84  | 2.60E-05 | 2.05  | 2.84E-05 | 2.38  | 2.35E-06 |
| <i>Cenpc1</i>   | -0.99 | 4.43E-08 | -1.00 | 9.87E-08 | -1.61 | 7.67E-10 |
| <i>Cenpe</i>    | -1.99 | 1.29E-05 | -2.46 | 5.87E-06 | -1.91 | 1.53E-05 |
| <i>Cenpi</i>    | -1.53 | 6.33E-04 | -1.86 | 3.49E-04 | -1.65 | 3.08E-04 |
| <i>Cenpl</i>    | -2.01 | 1.04E-06 | -2.53 | 4.34E-07 | -2.69 | 6.34E-08 |
| <i>Cenpq</i>    | -1.27 | 1.42E-06 | -1.17 | 7.69E-06 | -1.22 | 1.60E-06 |
| <i>Cenpw</i>    | -1.47 | 1.69E-03 | -1.59 | 2.12E-03 | -1.58 | 8.93E-04 |
| <i>Cep120</i>   | -1.35 | 1.06E-07 | -1.45 | 1.64E-07 | -1.34 | 6.73E-08 |
| <i>Cep19</i>    | 1.11  | 1.84E-05 | 0.78  | 8.15E-04 | 1.16  | 1.09E-05 |
| <i>Cep55</i>    | -2.32 | 2.39E-04 | -1.95 | 2.10E-03 | -2.08 | 4.93E-04 |
| <i>Cep57</i>    | -0.97 | 1.42E-06 | -1.10 | 1.46E-06 | -1.06 | 5.35E-07 |
| <i>Cep68</i>    | 1.05  | 5.76E-09 | 1.10  | 9.54E-09 | 1.27  | 5.48E-10 |
| <i>Cep76</i>    | -1.03 | 4.20E-06 | -1.20 | 3.14E-06 | -1.23 | 6.78E-07 |
| <i>Cep83os</i>  | 0.80  | 7.41E-05 | 1.14  | 1.01E-05 | 1.34  | 6.94E-07 |
| <i>Cep85l</i>   | -1.40 | 7.86E-07 | -1.60 | 7.15E-07 | -1.47 | 3.81E-07 |
| <i>Cfap43</i>   | -0.97 | 7.10E-09 | -1.31 | 3.71E-09 | -1.07 | 1.36E-09 |
| <i>Cfap97</i>   | 0.97  | 1.86E-07 | 1.02  | 3.35E-07 | 1.34  | 9.98E-09 |
| <i>Chaf1a</i>   | -2.39 | 5.16E-04 | -3.18 | 1.33E-04 | -3.33 | 2.95E-05 |
| <i>Chd1</i>     | -1.07 | 1.51E-07 | -1.16 | 2.06E-07 | -1.08 | 8.46E-08 |
| <i>Chd2</i>     | -1.42 | 4.72E-08 | -1.47 | 9.42E-08 | -1.22 | 8.63E-08 |
| <i>Chd7</i>     | -1.85 | 3.95E-08 | -2.09 | 4.51E-08 | -1.98 | 1.24E-08 |
| <i>Chdh</i>     | -1.37 | 1.46E-05 | -1.65 | 8.21E-06 | -1.90 | 6.84E-07 |
| <i>Chek1</i>    | -1.76 | 7.79E-05 | -2.37 | 1.73E-05 | -2.71 | 1.59E-06 |
| <i>Chek2</i>    | 1.93  | 1.08E-07 | 1.91  | 2.96E-07 | 1.88  | 8.00E-08 |
| <i>Chka</i>     | -1.86 | 4.05E-06 | -2.39 | 1.38E-06 | -2.78 | 9.95E-08 |
| <i>Chl1</i>     | -3.46 | 2.29E-04 | -2.75 | 2.88E-03 | -4.84 | 1.18E-05 |
| <i>Chn2</i>     | -2.02 | 3.59E-05 | -2.41 | 2.14E-05 | -2.23 | 1.30E-05 |
| <i>Chrm3</i>    | -2.25 | 1.50E-02 | -3.12 | 4.19E-03 | -2.69 | 4.81E-03 |
| <i>Chrna2</i>   | -2.22 | 5.37E-04 | -2.31 | 9.29E-04 | -2.32 | 3.41E-04 |
| <i>Chrnb1</i>   | 1.04  | 2.62E-05 | 1.15  | 3.02E-05 | 1.13  | 1.06E-05 |

|                |       |          |       |          |       |          |
|----------------|-------|----------|-------|----------|-------|----------|
| <i>Chrb2</i>   | 1.07  | 8.10E-07 | 1.03  | 3.28E-06 | 1.28  | 1.33E-07 |
| <i>Chrne</i>   | -1.81 | 2.75E-04 | -3.25 | 5.89E-06 | -2.24 | 4.15E-05 |
| <i>Chst12</i>  | 1.66  | 8.83E-07 | 1.75  | 1.57E-06 | 1.59  | 9.11E-07 |
| <i>Chst2</i>   | -3.07 | 5.55E-03 | -4.77 | 5.75E-04 | -6.98 | 8.26E-06 |
| <i>Ciart</i>   | -2.86 | 3.78E-03 | -3.39 | 2.59E-03 | -5.43 | 2.31E-05 |
| <i>Cir1</i>    | -1.16 | 6.19E-07 | -1.21 | 1.16E-06 | -1.03 | 1.26E-06 |
| <i>Cirh1a</i>  | -1.11 | 5.68E-08 | -1.23 | 7.67E-08 | -1.44 | 4.91E-09 |
| <i>Cited1</i>  | -1.42 | 1.22E-02 | -1.71 | 8.05E-03 | -1.36 | 1.44E-02 |
| <i>Cited2</i>  | -1.47 | 1.66E-06 | -1.79 | 9.06E-07 | -1.62 | 5.64E-07 |
| <i>Ckap2</i>   | -1.95 | 1.68E-06 | -2.25 | 1.42E-06 | -3.07 | 2.82E-08 |
| <i>Ckap2l</i>  | -2.24 | 1.34E-04 | -2.85 | 4.86E-05 | -2.69 | 2.44E-05 |
| <i>Ckb</i>     | -0.96 | 1.68E-05 | -1.39 | 2.04E-06 | -1.89 | 4.02E-08 |
| <i>Cks2</i>    | -2.06 | 3.79E-05 | -2.29 | 4.13E-05 | -4.04 | 9.31E-08 |
| <i>Clcf1</i>   | 0.97  | 3.37E-08 | 1.06  | 4.55E-08 | 1.15  | 5.08E-09 |
| <i>Cldn4</i>   | 1.91  | 9.08E-04 | 1.86  | 2.54E-03 | 1.07  | 3.08E-02 |
| <i>Cldnd1</i>  | -0.96 | 2.36E-07 | -1.10 | 2.19E-07 | -1.15 | 3.62E-08 |
| <i>Cltc</i>    | -1.41 | 4.60E-08 | -1.53 | 6.82E-08 | -1.67 | 7.17E-09 |
| <i>Cmah</i>    | 1.51  | 7.84E-10 | 1.54  | 1.27E-09 | 2.04  | 2.23E-11 |
| <i>Cnbp</i>    | -1.08 | 4.36E-08 | -1.14 | 7.58E-08 | -1.18 | 1.15E-08 |
| <i>Cnga1</i>   | 2.73  | 6.04E-09 | 2.90  | 1.00E-08 | 3.67  | 3.29E-10 |
| <i>Cnksr3</i>  | -1.18 | 7.92E-09 | -1.38 | 8.39E-09 | -1.22 | 2.33E-09 |
| <i>Cnnm4</i>   | -1.29 | 1.64E-06 | -1.69 | 4.86E-07 | -1.48 | 3.62E-07 |
| <i>Cnot6</i>   | -1.20 | 7.99E-08 | -1.18 | 2.39E-07 | -1.24 | 3.72E-08 |
| <i>Cnp</i>     | 1.42  | 4.70E-09 | 1.50  | 8.39E-09 | 1.61  | 6.79E-10 |
| <i>Cnst</i>    | -1.32 | 1.40E-08 | -1.39 | 2.43E-08 | -1.41 | 3.73E-09 |
| <i>Coa7</i>    | -1.01 | 8.55E-06 | -1.25 | 3.88E-06 | -1.10 | 3.23E-06 |
| <i>Coasy</i>   | 1.31  | 6.68E-06 | 1.54  | 4.59E-06 | 1.67  | 6.30E-07 |
| <i>Cobll1</i>  | -2.35 | 3.88E-04 | -1.73 | 7.33E-03 | -2.82 | 7.86E-05 |
| <i>Coll1a2</i> | 1.22  | 2.96E-08 | 1.30  | 4.71E-08 | 1.51  | 3.17E-09 |
| <i>Col23a1</i> | 0.96  | 1.08E-04 | 1.21  | 4.15E-05 | 1.54  | 1.61E-06 |
| <i>Colq</i>    | -2.75 | 9.65E-05 | -2.46 | 5.64E-04 | -2.44 | 2.21E-04 |
| <i>Cops2</i>   | -0.97 | 1.75E-06 | -1.06 | 2.45E-06 | -1.14 | 3.38E-07 |
| <i>Cops8</i>   | -1.11 | 1.59E-08 | -1.14 | 3.26E-08 | -1.18 | 4.42E-09 |
| <i>Coq10b</i>  | -2.55 | 2.04E-06 | -3.08 | 1.17E-06 | -3.52 | 9.80E-08 |
| <i>Coq3</i>    | 1.03  | 7.03E-07 | 0.93  | 4.66E-06 | 1.02  | 5.68E-07 |
| <i>Coq4</i>    | 1.20  | 1.43E-04 | 1.10  | 6.79E-04 | 1.41  | 3.34E-05 |
| <i>Coq7</i>    | -1.28 | 4.74E-04 | -1.81 | 7.57E-05 | -1.65 | 5.43E-05 |
| <i>Corin</i>   | 1.03  | 7.52E-04 | 1.15  | 7.89E-04 | 1.25  | 1.49E-04 |

|                      |       |          |       |          |       |          |
|----------------------|-------|----------|-------|----------|-------|----------|
| <i>Cpd</i>           | -2.82 | 3.05E-05 | -3.38 | 1.80E-05 | -4.61 | 3.58E-07 |
| <i>Cpne1</i>         | 1.16  | 4.51E-08 | 1.10  | 1.66E-07 | 1.27  | 1.26E-08 |
| <i>Cpq</i>           | -1.78 | 6.87E-04 | -2.14 | 4.10E-04 | -1.42 | 3.08E-03 |
| <i>Cpsf4l</i>        | 1.09  | 6.77E-03 | 1.42  | 2.50E-03 | 1.46  | 8.38E-04 |
| <i>Cpt2</i>          | 0.88  | 6.47E-05 | 1.39  | 3.84E-06 | 1.07  | 1.07E-05 |
| <i>Crbn</i>          | -1.61 | 3.72E-07 | -1.71 | 6.09E-07 | -1.24 | 2.39E-06 |
| <i>Crebl2</i>        | 2.11  | 3.03E-09 | 2.37  | 3.96E-09 | 1.57  | 7.05E-09 |
| <i>Crebrf</i>        | -1.49 | 1.59E-07 | -1.50 | 3.92E-07 | -1.08 | 1.59E-06 |
| <i>Creg1</i>         | -1.42 | 1.16E-07 | -1.45 | 2.49E-07 | -1.70 | 1.69E-08 |
| <i>Crem</i>          | -2.36 | 3.32E-06 | -2.83 | 2.04E-06 | -4.09 | 2.58E-08 |
| <i>Crip2</i>         | -2.34 | 1.50E-05 | -2.19 | 6.94E-05 | -2.11 | 3.05E-05 |
| <i>Crlf1</i>         | -1.80 | 3.89E-02 | -1.95 | 4.47E-02 | -1.74 | 4.27E-02 |
| <i>Crnk1l</i>        | -1.02 | 1.04E-07 | -1.05 | 2.13E-07 | -1.13 | 2.69E-08 |
| <i>Crtam</i>         | -1.67 | 1.57E-05 | -1.90 | 1.44E-05 | -1.60 | 1.88E-05 |
| <i>Cry2</i>          | -1.21 | 6.36E-07 | -1.52 | 2.93E-07 | -1.40 | 1.38E-07 |
| <i>Crybg3</i>        | 1.97  | 6.25E-07 | 1.56  | 1.19E-05 | 2.11  | 2.58E-07 |
| <i>Cryz1l</i>        | 1.27  | 4.28E-07 | 1.49  | 3.22E-07 | 1.66  | 3.26E-08 |
| <i>Csad</i>          | 0.97  | 9.80E-07 | 1.34  | 2.01E-07 | 1.22  | 1.04E-07 |
| <i>Csrp1</i>         | -1.62 | 3.42E-08 | -1.91 | 2.97E-08 | -1.96 | 4.33E-09 |
| <i>Cst7</i>          | -1.49 | 8.41E-04 | -1.79 | 4.86E-04 | -1.81 | 1.60E-04 |
| <i>Ctdp1</i>         | -1.49 | 1.64E-08 | -1.62 | 2.41E-08 | -1.56 | 5.22E-09 |
| <i>Cth</i>           | -1.95 | 1.33E-03 | -2.29 | 9.63E-04 | -1.89 | 1.51E-03 |
| <i>Ctla2a</i>        | -1.14 | 4.12E-02 | -1.62 | 1.22E-02 | -4.86 | 8.41E-07 |
| <i>Ctla2b</i>        | -3.27 | 2.08E-03 | -4.15 | 8.59E-04 | -5.42 | 3.48E-05 |
| <i>Ctnn1l</i>        | -0.62 | 6.48E-03 | -1.03 | 4.20E-04 | -1.39 | 1.13E-05 |
| <i>Ctnnbip1</i>      | -2.42 | 3.82E-04 | -2.33 | 1.22E-03 | -2.18 | 7.61E-04 |
| <i>Ctsk</i>          | 1.69  | 3.94E-04 | 1.67  | 1.06E-03 | 1.34  | 2.03E-03 |
| <i>Ctsl</i>          | -1.02 | 6.33E-06 | -1.19 | 4.54E-06 | -1.30 | 6.13E-07 |
| <i>Cul2</i>          | -1.16 | 2.52E-07 | -1.30 | 2.88E-07 | -1.29 | 6.93E-08 |
| <i>Cwc25</i>         | -1.24 | 1.53E-06 | -1.50 | 8.69E-07 | -1.37 | 4.95E-07 |
| <i>Cx3cr1</i>        | -2.89 | 3.06E-03 | -3.78 | 1.03E-03 | -4.63 | 7.57E-05 |
| <i>Cxcr4</i>         | -2.13 | 2.85E-07 | -2.46 | 2.48E-07 | -1.99 | 3.48E-07 |
| <i>Cxcr5</i>         | -1.11 | 2.19E-02 | -1.89 | 1.65E-03 | -1.09 | 2.21E-02 |
| <i>Cxxc5</i>         | 1.64  | 2.99E-04 | 1.82  | 3.31E-04 | 2.46  | 8.83E-06 |
| <i>Cyb561a3</i>      | 0.94  | 2.31E-06 | 1.25  | 6.02E-07 | 1.26  | 1.47E-07 |
| <i>Cystm1</i>        | -2.85 | 3.22E-04 | -2.93 | 6.26E-04 | -3.81 | 2.54E-05 |
| <i>D130017N08Rik</i> | 2.11  | 2.63E-07 | 2.24  | 4.59E-07 | 2.73  | 2.28E-08 |
| <i>D15Ertd621e</i>   | -1.31 | 2.50E-07 | -1.46 | 2.96E-07 | -1.50 | 5.51E-08 |

|                      |       |          |       |          |       |          |
|----------------------|-------|----------|-------|----------|-------|----------|
| <i>D230017M19Rik</i> | 1.67  | 2.18E-03 | 1.92  | 1.83E-03 | 1.93  | 7.04E-04 |
| <i>D2hgdh</i>        | 1.22  | 9.27E-09 | 1.17  | 2.80E-08 | 1.57  | 6.92E-10 |
| <i>D330041H03Rik</i> | 0.82  | 3.82E-06 | 1.07  | 1.23E-06 | 1.19  | 1.24E-07 |
| <i>D3Ertd751e</i>    | 1.04  | 5.54E-06 | 1.13  | 7.49E-06 | 1.30  | 6.37E-07 |
| <i>D6Ertd474e</i>    | 1.70  | 5.64E-04 | 1.37  | 5.54E-03 | 2.34  | 3.72E-05 |
| <i>D730003I15Rik</i> | 1.13  | 8.29E-04 | 0.92  | 7.20E-03 | 1.11  | 8.28E-04 |
| <i>D8Ertd82e</i>     | -1.12 | 1.23E-05 | -1.44 | 4.11E-06 | -2.49 | 1.29E-08 |
| <i>D930048N14Rik</i> | 2.19  | 5.45E-06 | 2.05  | 2.61E-05 | 1.81  | 2.30E-05 |
| <i>Daf2</i>          | 2.32  | 1.87E-05 | 3.04  | 5.25E-06 | 2.54  | 7.12E-06 |
| <i>Dag1</i>          | 1.10  | 4.79E-08 | 1.04  | 1.79E-07 | 2.56  | 9.44E-11 |
| <i>Dand5</i>         | 3.16  | 3.09E-07 | 3.26  | 6.48E-07 | 3.59  | 7.45E-08 |
| <i>Dapp1</i>         | -1.18 | 1.38E-07 | -1.16 | 3.96E-07 | -1.47 | 1.49E-08 |
| <i>Dbf4</i>          | -1.64 | 9.23E-07 | -1.89 | 8.08E-07 | -2.01 | 1.18E-07 |
| <i>Dbn1</i>          | -1.56 | 6.84E-03 | -1.65 | 9.99E-03 | -2.08 | 8.93E-04 |
| <i>Dbp</i>           | 1.94  | 2.08E-09 | 2.01  | 3.71E-09 | 1.34  | 5.81E-09 |
| <i>Dcakd</i>         | 1.05  | 4.37E-04 | 1.66  | 2.67E-05 | 1.31  | 6.10E-05 |
| <i>Dcdc2b</i>        | 1.79  | 7.40E-03 | 1.91  | 9.73E-03 | 2.72  | 3.58E-04 |
| <i>Dclre1a</i>       | -1.32 | 3.74E-05 | -1.06 | 5.26E-04 | -1.47 | 1.19E-05 |
| <i>Dclre1c</i>       | -1.14 | 2.23E-07 | -1.18 | 4.59E-07 | -1.34 | 4.04E-08 |
| <i>Dcp1b</i>         | 1.11  | 9.89E-08 | 1.12  | 2.34E-07 | 1.28  | 1.93E-08 |
| <i>Ddhd1</i>         | -0.95 | 1.85E-07 | -1.17 | 1.08E-07 | -1.17 | 2.28E-08 |
| <i>Ddias</i>         | -1.91 | 2.68E-05 | -2.65 | 4.72E-06 | -2.37 | 3.46E-06 |
| <i>Ddx3x</i>         | -1.24 | 6.50E-07 | -1.38 | 7.28E-07 | -1.62 | 5.09E-08 |
| <i>Decr1</i>         | 0.99  | 5.21E-07 | 1.06  | 7.73E-07 | 1.15  | 1.03E-07 |
| <i>Deqs2</i>         | 1.06  | 3.79E-03 | 1.88  | 1.29E-04 | 2.39  | 5.32E-06 |
| <i>Dennd1c</i>       | 0.87  | 3.05E-07 | 1.07  | 1.68E-07 | 1.31  | 7.98E-09 |
| <i>Dennd4a</i>       | -2.26 | 3.64E-07 | -2.52 | 4.13E-07 | -2.81 | 4.15E-08 |
| <i>Dennd6a</i>       | 1.08  | 1.37E-07 | 1.13  | 2.40E-07 | 1.26  | 2.44E-08 |
| <i>Depdc1b</i>       | 1.29  | 6.62E-04 | 0.98  | 9.01E-03 | 1.03  | 2.98E-03 |
| <i>Dgat1</i>         | -1.89 | 1.03E-08 | -2.20 | 1.02E-08 | -2.24 | 1.36E-09 |
| <i>Dgat2</i>         | -1.15 | 1.36E-02 | -1.17 | 2.35E-02 | -1.98 | 3.17E-04 |
| <i>Dguok</i>         | 1.35  | 2.63E-09 | 1.53  | 3.71E-09 | 1.66  | 2.27E-10 |
| <i>Dhcr24</i>        | 1.66  | 6.03E-09 | 1.84  | 8.39E-09 | 1.26  | 1.47E-08 |
| <i>Dhdh</i>          | 1.06  | 1.58E-02 | 1.12  | 2.14E-02 | 1.31  | 4.22E-03 |
| <i>Dhrs1</i>         | 1.02  | 2.96E-07 | 0.95  | 1.34E-06 | 1.25  | 3.67E-08 |
| <i>Dhrs3</i>         | -2.07 | 1.96E-04 | -2.62 | 7.34E-05 | -3.55 | 1.65E-06 |
| <i>Dhrs7</i>         | 1.26  | 9.38E-07 | 1.11  | 7.43E-06 | 1.37  | 3.41E-07 |
| <i>Dhx38</i>         | -1.23 | 1.03E-08 | -1.36 | 1.40E-08 | -1.36 | 2.08E-09 |



|                |       |          |       |          |       |          |
|----------------|-------|----------|-------|----------|-------|----------|
| <i>Dhx40</i>   | -1.32 | 8.58E-08 | -1.47 | 1.02E-07 | -1.74 | 6.57E-09 |
| <i>Dhx8</i>    | -1.07 | 4.39E-08 | -1.16 | 6.76E-08 | -1.14 | 1.49E-08 |
| <i>Dio2</i>    | -1.18 | 2.50E-02 | -1.65 | 7.45E-03 | -1.09 | 3.50E-02 |
| <i>Dixdc1</i>  | 2.26  | 3.04E-05 | 3.14  | 5.21E-06 | 2.87  | 3.22E-06 |
| <i>Dlk1</i>    | -1.26 | 2.98E-02 | -3.05 | 1.97E-04 | -2.40 | 4.58E-04 |
| <i>Dmbt1</i>   | 1.26  | 3.27E-03 | 1.45  | 2.70E-03 | 1.72  | 2.88E-04 |
| <i>Dnah17</i>  | 1.44  | 5.78E-08 | 1.31  | 3.05E-07 | 1.42  | 3.72E-08 |
| <i>Dnajb4</i>  | -1.41 | 3.36E-06 | -1.57 | 3.79E-06 | -1.71 | 4.91E-07 |
| <i>Dnajb6</i>  | -1.33 | 7.35E-08 | -1.43 | 1.12E-07 | -1.41 | 2.74E-08 |
| <i>Dnajb9</i>  | -1.85 | 2.33E-05 | -2.22 | 1.36E-05 | -2.20 | 4.29E-06 |
| <i>Dnajc12</i> | -0.57 | 4.78E-04 | -1.01 | 1.16E-05 | -1.26 | 4.95E-07 |
| <i>Dntt</i>    | 1.22  | 2.49E-07 | 1.06  | 2.13E-06 | 2.15  | 2.32E-09 |
| <i>Dnttip2</i> | -0.97 | 4.29E-06 | -1.07 | 5.16E-06 | -1.24 | 4.16E-07 |
| <i>Doc2g</i>   | 1.07  | 9.14E-05 | 0.86  | 1.21E-03 | 1.07  | 7.82E-05 |
| <i>Dock4</i>   | -1.47 | 2.56E-06 | -1.31 | 1.90E-05 | -2.59 | 1.83E-08 |
| <i>Dock6</i>   | 1.12  | 6.50E-07 | 1.07  | 2.70E-06 | 1.23  | 2.18E-07 |
| <i>Dok3</i>    | 1.24  | 3.97E-03 | 1.75  | 7.74E-04 | 1.61  | 5.37E-04 |
| <i>Donson</i>  | -1.11 | 1.34E-07 | -1.13 | 2.98E-07 | -1.08 | 1.03E-07 |
| <i>Dos</i>     | -1.02 | 3.24E-06 | -1.37 | 7.93E-07 | -1.52 | 8.20E-08 |
| <i>Dot1l</i>   | -0.94 | 2.10E-07 | -1.04 | 2.48E-07 | -1.16 | 2.53E-08 |
| <i>Dpml</i>    | -1.15 | 4.55E-03 | -2.43 | 3.90E-05 | -1.91 | 9.31E-05 |
| <i>Dqx1</i>    | 0.96  | 5.51E-05 | 1.10  | 4.57E-05 | 1.59  | 5.80E-07 |
| <i>Dscc1</i>   | -1.22 | 2.96E-04 | -0.85 | 7.93E-03 | -1.56 | 3.29E-05 |
| <i>Dst_1</i>   | 3.34  | 3.43E-08 | 3.48  | 6.57E-08 | 1.34  | 4.04E-05 |
| <i>Dtl</i>     | -3.48 | 3.01E-03 | -5.02 | 4.89E-04 | -7.33 | 7.04E-06 |
| <i>Dtnbp1</i>  | -1.10 | 3.66E-08 | -1.28 | 3.44E-08 | -1.52 | 1.93E-09 |
| <i>Dtx1</i>    | -1.94 | 3.20E-07 | -2.42 | 1.65E-07 | -2.86 | 1.03E-08 |
| <i>Dtx4</i>    | -2.82 | 7.40E-06 | -3.59 | 2.73E-06 | -1.45 | 1.39E-03 |
| <i>Dusp1</i>   | -2.22 | 1.62E-06 | -2.87 | 5.44E-07 | -3.11 | 7.02E-08 |
| <i>Dusp10</i>  | -2.74 | 5.65E-06 | -3.62 | 1.52E-06 | -4.04 | 1.59E-07 |
| <i>Dusp14</i>  | -1.68 | 8.72E-03 | -2.60 | 9.96E-04 | -2.19 | 1.35E-03 |
| <i>Dusp16</i>  | -2.92 | 6.60E-06 | -3.73 | 2.40E-06 | -4.86 | 6.75E-08 |
| <i>Dusp19</i>  | 1.58  | 6.81E-03 | 2.14  | 1.99E-03 | 1.59  | 6.18E-03 |
| <i>Dusp4</i>   | -3.08 | 3.45E-04 | -4.72 | 2.82E-05 | -5.41 | 2.59E-06 |
| <i>Dusp5</i>   | -2.12 | 5.88E-06 | -2.77 | 1.78E-06 | -4.63 | 7.84E-09 |
| <i>Dusp6</i>   | -2.26 | 5.36E-06 | -3.00 | 1.40E-06 | -3.20 | 2.11E-07 |
| <i>Dusp7</i>   | 2.48  | 2.21E-09 | 2.47  | 5.43E-09 | 2.65  | 3.89E-10 |
| <i>Dusp8</i>   | -3.13 | 3.58E-03 | -5.10 | 2.36E-04 | -5.29 | 5.97E-05 |

|                      |       |          |       |          |       |          |
|----------------------|-------|----------|-------|----------|-------|----------|
| <i>Dynlt1c</i>       | 1.04  | 2.08E-04 | 1.15  | 2.31E-04 | 1.52  | 7.26E-06 |
| <i>Dyrk3</i>         | -1.73 | 2.14E-02 | -1.62 | 4.93E-02 | -2.33 | 3.31E-03 |
| <i>Dzip3</i>         | 1.67  | 7.58E-08 | 1.94  | 6.99E-08 | 1.91  | 1.55E-08 |
| <i>E030042O20Rik</i> | 1.41  | 1.38E-03 | 1.10  | 1.40E-02 | 2.09  | 5.37E-05 |
| <i>E2f1</i>          | -1.09 | 6.33E-07 | -1.29 | 4.44E-07 | -1.46 | 4.02E-08 |
| <i>E2f7</i>          | -2.70 | 9.67E-04 | -3.74 | 1.96E-04 | -5.04 | 5.04E-06 |
| <i>E330020D12Rik</i> | 1.00  | 1.56E-02 | 1.61  | 1.68E-03 | 1.87  | 1.98E-04 |
| <i>E330034G19Rik</i> | 1.24  | 2.32E-03 | 1.65  | 6.92E-04 | 1.56  | 3.99E-04 |
| <i>Ebpl</i>          | 1.15  | 1.17E-06 | 1.05  | 6.87E-06 | 1.07  | 1.71E-06 |
| <i>Edaradd</i>       | 1.76  | 4.02E-04 | 1.16  | 1.38E-02 | 2.04  | 1.05E-04 |
| <i>Eeal</i>          | -1.07 | 5.77E-05 | -1.20 | 5.96E-05 | -1.58 | 1.70E-06 |
| <i>Eed</i>           | -0.95 | 3.22E-08 | -1.05 | 4.27E-08 | -1.03 | 9.15E-09 |
| <i>Eepd1</i>         | -1.56 | 1.13E-03 | -1.47 | 3.75E-03 | -2.48 | 2.36E-05 |
| <i>Efcab5</i>        | 1.88  | 1.42E-05 | 1.98  | 2.56E-05 | 1.87  | 1.28E-05 |
| <i>Efcab7</i>        | 1.23  | 6.98E-03 | 1.20  | 1.51E-02 | 1.10  | 1.24E-02 |
| <i>Efcab9</i>        | 1.18  | 2.66E-02 | 2.25  | 9.86E-04 | 1.78  | 2.09E-03 |
| <i>Efnb2</i>         | -1.84 | 4.68E-04 | -2.34 | 1.79E-04 | -2.53 | 3.12E-05 |
| <i>Efnb3</i>         | 2.28  | 1.58E-06 | 2.15  | 7.20E-06 | 2.48  | 5.90E-07 |
| <i>Egf</i>           | -1.41 | 6.03E-05 | -1.74 | 2.79E-05 | -1.49 | 3.26E-05 |
| <i>Egfr</i>          | 4.60  | 1.60E-06 | 3.76  | 2.33E-05 | 1.94  | 1.55E-03 |
| <i>Egln3</i>         | -1.08 | 1.87E-04 | -1.21 | 1.88E-04 | -1.29 | 3.75E-05 |
| <i>Egr1</i>          | -2.57 | 9.16E-06 | -3.42 | 2.28E-06 | -3.46 | 5.58E-07 |
| <i>Egr2</i>          | -2.99 | 1.05E-03 | -4.62 | 8.83E-05 | -5.32 | 8.42E-06 |
| <i>Egr3</i>          | -3.03 | 1.72E-04 | -4.56 | 1.56E-05 | -5.18 | 1.51E-06 |
| <i>Ehd2</i>          | -1.31 | 2.80E-02 | -1.53 | 2.22E-02 | -1.77 | 4.55E-03 |
| <i>Ehd4</i>          | -2.29 | 3.22E-06 | -2.77 | 1.82E-06 | -3.88 | 2.90E-08 |
| <i>Eif2ak3</i>       | -2.15 | 1.53E-07 | -2.42 | 1.66E-07 | -3.01 | 7.30E-09 |
| <i>Eif3j1</i>        | -1.01 | 2.90E-06 | -1.02 | 7.91E-06 | -1.30 | 2.66E-07 |
| <i>Eif5</i>          | -1.05 | 1.38E-07 | -1.11 | 2.32E-07 | -1.09 | 6.51E-08 |
| <i>Elavl1</i>        | -1.01 | 4.12E-08 | -1.05 | 7.79E-08 | -1.06 | 1.56E-08 |
| <i>Ell2</i>          | -2.59 | 2.12E-06 | -3.35 | 7.22E-07 | -3.50 | 1.26E-07 |
| <i>Elmsan1</i>       | -2.37 | 1.77E-07 | -2.99 | 8.76E-08 | -3.14 | 1.27E-08 |
| <i>Elovl2</i>        | -3.13 | 4.30E-03 | -2.62 | 2.32E-02 | -3.60 | 1.52E-03 |
| <i>Elovl4</i>        | -2.94 | 1.32E-03 | -3.23 | 1.54E-03 | -3.93 | 1.23E-04 |
| <i>Elp5</i>          | -0.88 | 2.90E-06 | -1.11 | 1.15E-06 | -1.03 | 5.41E-07 |
| <i>Emc3</i>          | -1.17 | 6.12E-08 | -1.19 | 1.37E-07 | -1.18 | 3.27E-08 |
| <i>Emc9</i>          | 1.89  | 1.59E-08 | 2.03  | 2.49E-08 | 2.16  | 2.79E-09 |
| <i>Eme1</i>          | -1.91 | 3.97E-04 | -2.17 | 3.64E-04 | -2.35 | 6.60E-05 |

|                      |       |          |       |          |       |          |
|----------------------|-------|----------|-------|----------|-------|----------|
| <i>Emid1</i>         | -1.08 | 1.20E-03 | -0.86 | 1.15E-02 | -1.40 | 1.50E-04 |
| <i>Emilin1</i>       | -1.18 | 2.35E-05 | -1.33 | 2.27E-05 | -1.22 | 1.45E-05 |
| <i>Eml4</i>          | -1.40 | 3.56E-08 | -1.54 | 4.60E-08 | -1.68 | 4.91E-09 |
| <i>Emp1</i>          | -2.80 | 2.01E-03 | -4.31 | 1.90E-04 | -6.14 | 2.97E-06 |
| <i>Endod1</i>        | -1.20 | 4.79E-04 | -1.42 | 3.24E-04 | -1.31 | 2.20E-04 |
| <i>Endou</i>         | -1.80 | 1.74E-02 | -2.68 | 3.14E-03 | -2.27 | 4.06E-03 |
| <i>Enkur</i>         | -3.25 | 8.35E-05 | -4.50 | 1.48E-05 | -3.96 | 1.31E-05 |
| <i>Epas1</i>         | -1.28 | 1.06E-07 | -1.66 | 4.55E-08 | -2.30 | 9.34E-10 |
| <i>Epc2</i>          | -1.28 | 7.06E-08 | -1.31 | 1.49E-07 | -1.17 | 8.40E-08 |
| <i>Eprs</i>          | -0.94 | 3.40E-09 | -1.06 | 4.19E-09 | -1.27 | 1.66E-10 |
| <i>Eps15</i>         | 1.04  | 1.30E-08 | 1.12  | 1.96E-08 | 1.31  | 1.10E-09 |
| <i>Ern1</i>          | -1.24 | 5.93E-07 | -1.20 | 2.14E-06 | -1.80 | 2.03E-08 |
| <i>Errfi1</i>        | -1.14 | 8.48E-05 | -1.45 | 3.08E-05 | -1.88 | 1.01E-06 |
| <i>Espn</i>          | 2.13  | 2.84E-08 | 2.31  | 4.36E-08 | 1.99  | 2.30E-08 |
| <i>Etf1</i>          | -1.16 | 3.52E-07 | -1.29 | 4.04E-07 | -1.32 | 8.01E-08 |
| <i>Ets2</i>          | -2.12 | 3.90E-07 | -2.68 | 1.73E-07 | -2.32 | 1.29E-07 |
| <i>Evpl</i>          | -1.38 | 2.85E-04 | -1.49 | 3.80E-04 | -1.28 | 4.61E-04 |
| <i>Exo1</i>          | -2.06 | 1.45E-04 | -2.66 | 4.65E-05 | -2.60 | 1.75E-05 |
| <i>Exoc3l</i>        | 0.84  | 8.07E-03 | 1.29  | 1.00E-03 | 1.55  | 8.50E-05 |
| <i>Exoc5</i>         | -0.96 | 9.07E-07 | -1.02 | 1.51E-06 | -1.13 | 1.67E-07 |
| <i>Extl2</i>         | -1.21 | 1.77E-05 | -1.43 | 1.25E-05 | -1.86 | 3.54E-07 |
| <i>Eya2</i>          | -1.25 | 1.05E-04 | -1.11 | 6.33E-04 | -1.96 | 1.90E-06 |
| <i>F2r</i>           | -1.03 | 1.39E-06 | -1.41 | 2.91E-07 | -1.18 | 3.26E-07 |
| <i>F2rl3</i>         | 2.33  | 5.45E-07 | 1.97  | 5.91E-06 | 1.23  | 9.68E-05 |
| <i>F730043M19Rik</i> | -1.26 | 5.93E-03 | -1.26 | 1.19E-02 | -2.30 | 6.09E-05 |
| <i>F730311O21Rik</i> | 1.56  | 8.69E-06 | 1.66  | 1.38E-05 | 4.27  | 2.21E-09 |
| <i>F830016B08Rik</i> | 1.48  | 6.05E-03 | 2.41  | 4.41E-04 | 4.00  | 2.04E-06 |
| <i>Fads1</i>         | 1.37  | 3.62E-07 | 1.41  | 7.84E-07 | 1.36  | 2.68E-07 |
| <i>Fam102a</i>       | 1.05  | 7.04E-08 | 1.15  | 9.21E-08 | 1.40  | 4.87E-09 |
| <i>Fam103a1</i>      | -1.29 | 1.97E-07 | -1.27 | 6.08E-07 | -1.26 | 1.62E-07 |
| <i>Fam107b</i>       | -1.96 | 4.87E-07 | -2.37 | 2.93E-07 | -1.81 | 6.75E-07 |
| <i>Fam111a</i>       | 0.73  | 1.39E-07 | 1.01  | 4.11E-08 | 1.19  | 2.41E-09 |
| <i>Fam122b</i>       | 1.11  | 3.47E-08 | 1.23  | 4.48E-08 | 1.57  | 1.50E-09 |
| <i>Fam160a2</i>      | 1.26  | 2.18E-08 | 1.33  | 3.89E-08 | 1.29  | 8.85E-09 |
| <i>Fam161b</i>       | -1.37 | 6.02E-05 | -1.15 | 5.83E-04 | -1.02 | 5.52E-04 |
| <i>Fam169b</i>       | 1.05  | 8.35E-08 | 1.16  | 1.05E-07 | 1.28  | 1.06E-08 |
| <i>Fam173a</i>       | 1.25  | 1.50E-07 | 1.23  | 4.38E-07 | 1.27  | 8.22E-08 |
| <i>Fam173b</i>       | 1.46  | 3.12E-07 | 1.68  | 2.88E-07 | 1.99  | 1.83E-08 |

|                 |       |          |       |          |       |          |
|-----------------|-------|----------|-------|----------|-------|----------|
| <i>Fam186b</i>  | 1.67  | 3.24E-04 | 1.91  | 2.77E-04 | 1.33  | 1.63E-03 |
| <i>Fam193b</i>  | 1.00  | 1.28E-07 | 1.11  | 1.62E-07 | 1.15  | 2.71E-08 |
| <i>Fam213a</i>  | 1.42  | 1.78E-07 | 1.40  | 5.23E-07 | 1.20  | 4.87E-07 |
| <i>Fam222a</i>  | -1.56 | 3.67E-05 | -2.12 | 7.23E-06 | -1.68 | 1.58E-05 |
| <i>Fam53a</i>   | 1.12  | 5.83E-08 | 1.13  | 1.38E-07 | 1.40  | 6.27E-09 |
| <i>Fam83d</i>   | -2.72 | 9.14E-04 | -4.17 | 8.03E-05 | -3.27 | 1.96E-04 |
| <i>Fam89a</i>   | 1.12  | 2.43E-06 | 1.07  | 9.84E-06 | 1.48  | 1.72E-07 |
| <i>Fancg</i>    | 1.07  | 3.42E-06 | 0.99  | 1.71E-05 | 1.35  | 3.41E-07 |
| <i>Fanci</i>    | -1.74 | 8.34E-07 | -1.90 | 1.15E-06 | -1.10 | 3.50E-05 |
| <i>Fancm</i>    | -1.48 | 4.46E-08 | -1.50 | 1.03E-07 | -1.75 | 7.34E-09 |
| <i>Far2</i>     | 1.38  | 1.05E-03 | 2.07  | 1.09E-04 | 1.20  | 2.43E-03 |
| <i>Fasl</i>     | -1.73 | 6.22E-06 | -1.99 | 5.26E-06 | -2.43 | 2.56E-07 |
| <i>Fastkd1</i>  | 1.28  | 1.81E-07 | 1.39  | 2.54E-07 | 1.45  | 4.32E-08 |
| <i>Fbxl12os</i> | 1.19  | 9.19E-05 | 1.04  | 6.64E-04 | 2.04  | 7.45E-07 |
| <i>Fbxl14</i>   | -1.62 | 2.08E-02 | -1.53 | 4.68E-02 | -1.40 | 4.00E-02 |
| <i>Fbxl18</i>   | 1.62  | 1.47E-08 | 1.75  | 2.16E-08 | 2.02  | 1.39E-09 |
| <i>Fbxl8</i>    | 1.33  | 6.11E-07 | 1.25  | 2.76E-06 | 1.51  | 1.47E-07 |
| <i>Fbxo10</i>   | 1.53  | 3.04E-06 | 1.26  | 4.24E-05 | 1.44  | 4.07E-06 |
| <i>Fbxo17</i>   | 3.59  | 4.70E-09 | 3.30  | 1.73E-08 | 2.58  | 1.54E-08 |
| <i>Fbxo27</i>   | 1.05  | 1.21E-02 | 1.43  | 3.57E-03 | 1.70  | 4.12E-04 |
| <i>Fbxo32</i>   | -1.60 | 1.70E-07 | -1.91 | 1.21E-07 | -1.51 | 1.80E-07 |
| <i>Fbxo33</i>   | -1.50 | 6.93E-07 | -1.65 | 8.68E-07 | -1.54 | 4.05E-07 |
| <i>Fbxo34</i>   | -1.75 | 5.92E-08 | -2.16 | 3.93E-08 | -2.13 | 7.83E-09 |
| <i>Fbxo44</i>   | -1.28 | 1.50E-02 | -1.48 | 1.24E-02 | -2.50 | 1.23E-04 |
| <i>Fbxo8</i>    | -1.31 | 8.68E-08 | -1.44 | 1.10E-07 | -1.34 | 4.35E-08 |
| <i>Fcer1g</i>   | 1.14  | 1.52E-02 | 1.07  | 3.69E-02 | 1.17  | 1.23E-02 |
| <i>Fen1</i>     | -1.42 | 1.67E-08 | -1.71 | 1.40E-08 | -1.57 | 3.73E-09 |
| <i>Fer1l5</i>   | 1.36  | 1.30E-05 | 1.52  | 1.39E-05 | 1.67  | 1.83E-06 |
| <i>Fgf22</i>    | -1.81 | 1.12E-02 | -1.58 | 4.05E-02 | -1.75 | 1.25E-02 |
| <i>Fgfbp3</i>   | 0.89  | 7.68E-03 | 1.46  | 5.53E-04 | 1.31  | 4.61E-04 |
| <i>Fgfr1</i>    | -2.33 | 3.86E-04 | -3.07 | 1.08E-04 | -2.61 | 1.35E-04 |
| <i>Fgfr3</i>    | -2.25 | 3.94E-04 | -2.35 | 6.72E-04 | -2.75 | 6.87E-05 |
| <i>Fgfrl1</i>   | -0.86 | 8.81E-04 | -1.03 | 5.11E-04 | -1.38 | 1.64E-05 |
| <i>Fgr</i>      | -2.43 | 3.84E-03 | -1.83 | 3.60E-02 | -2.18 | 7.08E-03 |
| <i>Fhod1</i>    | 1.36  | 5.72E-07 | 1.27  | 2.77E-06 | 1.46  | 2.16E-07 |
| <i>Figl1</i>    | -2.29 | 5.59E-05 | -2.83 | 2.54E-05 | -1.67 | 6.22E-04 |
| <i>Fkbp2</i>    | 0.99  | 6.25E-05 | 1.29  | 1.81E-05 | 1.07  | 2.67E-05 |
| <i>Fkbp1</i>    | 1.12  | 2.04E-04 | 0.82  | 4.40E-03 | 1.54  | 1.21E-05 |

|                      |       |          |       |          |       |          |
|----------------------|-------|----------|-------|----------|-------|----------|
| <i>Fktn</i>          | 1.19  | 4.38E-06 | 1.22  | 9.96E-06 | 1.30  | 1.62E-06 |
| <i>Flad1</i>         | 1.21  | 3.95E-08 | 1.29  | 6.26E-08 | 1.59  | 2.79E-09 |
| <i>Flcn</i>          | -1.23 | 2.47E-08 | -1.39 | 2.94E-08 | -1.18 | 1.66E-08 |
| <i>Flot1</i>         | 1.14  | 5.29E-05 | 1.11  | 1.70E-04 | 1.28  | 1.65E-05 |
| <i>Fmnl3</i>         | -1.12 | 2.06E-08 | -1.29 | 2.13E-08 | -1.28 | 3.65E-09 |
| <i>Fmo5</i>          | 1.80  | 3.49E-08 | 2.05  | 3.87E-08 | 2.39  | 2.35E-09 |
| <i>Fn3k</i>          | 1.76  | 2.05E-06 | 1.11  | 2.50E-04 | 1.98  | 5.73E-07 |
| <i>Fn3krp</i>        | 1.01  | 5.53E-06 | 0.88  | 4.72E-05 | 1.43  | 2.20E-07 |
| <i>Fndc4</i>         | -1.83 | 2.41E-02 | -2.64 | 5.82E-03 | -2.24 | 7.23E-03 |
| <i>Fosb</i>          | -3.43 | 2.15E-03 | -5.77 | 9.94E-05 | -6.69 | 8.85E-06 |
| <i>Fosl2</i>         | -3.27 | 1.68E-04 | -4.88 | 1.62E-05 | -7.04 | 1.96E-07 |
| <i>Foxd2os</i>       | 1.54  | 4.97E-07 | 1.52  | 1.54E-06 | 1.57  | 3.12E-07 |
| <i>Foxj3</i>         | -0.99 | 2.90E-07 | -1.07 | 4.54E-07 | -1.02 | 1.63E-07 |
| <i>Foxq1</i>         | -3.05 | 2.68E-03 | -4.60 | 3.07E-04 | -3.23 | 1.66E-03 |
| <i>Fra10ac1</i>      | 1.14  | 4.62E-07 | 1.24  | 6.29E-07 | 1.18  | 2.53E-07 |
| <i>Frat2</i>         | -1.53 | 2.68E-07 | -1.90 | 1.44E-07 | -1.80 | 4.92E-08 |
| <i>Frmd4b</i>        | -2.69 | 1.17E-05 | -3.51 | 3.34E-06 | -3.53 | 8.84E-07 |
| <i>Frmd6</i>         | -1.03 | 1.60E-06 | -1.21 | 1.18E-06 | -1.36 | 1.12E-07 |
| <i>Frmd8</i>         | 1.41  | 4.69E-09 | 1.43  | 8.76E-09 | 1.58  | 6.76E-10 |
| <i>Frmpd1</i>        | -2.19 | 1.11E-02 | -3.25 | 1.85E-03 | -3.32 | 6.07E-04 |
| <i>Frs3</i>          | 0.90  | 5.47E-03 | 1.04  | 4.76E-03 | 1.21  | 6.45E-04 |
| <i>Fscn1</i>         | -2.17 | 1.28E-02 | -2.00 | 3.48E-02 | -1.82 | 3.00E-02 |
| <i>Fst</i>           | -3.21 | 8.85E-04 | -3.99 | 4.12E-04 | -3.91 | 1.69E-04 |
| <i>Fus</i>           | -1.56 | 7.95E-08 | -1.69 | 1.13E-07 | -1.78 | 1.69E-08 |
| <i>Fut7</i>          | 2.16  | 6.46E-04 | 2.90  | 1.59E-04 | 1.29  | 1.70E-02 |
| <i>Fxyd7</i>         | 2.18  | 9.41E-03 | 2.00  | 2.78E-02 | 2.50  | 3.67E-03 |
| <i>Fycol</i>         | 1.30  | 7.06E-08 | 1.45  | 8.75E-08 | 1.67  | 6.46E-09 |
| <i>G430095P16Rik</i> | 3.66  | 1.78E-05 | 2.81  | 3.95E-04 | 2.66  | 2.17E-04 |
| <i>Gab3</i>          | 2.30  | 2.52E-08 | 2.18  | 8.82E-08 | 1.32  | 1.20E-06 |
| <i>Gabarapl1</i>     | -1.34 | 2.14E-07 | -1.53 | 2.16E-07 | -1.70 | 2.20E-08 |
| <i>Gabbr1</i>        | 0.93  | 4.56E-08 | 1.04  | 5.78E-08 | 1.03  | 1.19E-08 |
| <i>Gabpb1</i>        | -2.24 | 1.14E-07 | -2.61 | 9.91E-08 | -2.59 | 2.24E-08 |
| <i>Gadd45b</i>       | -2.76 | 1.51E-06 | -3.53 | 5.62E-07 | -2.31 | 5.44E-06 |
| <i>Galnt11</i>       | 1.03  | 7.67E-08 | 1.08  | 1.43E-07 | 1.10  | 2.71E-08 |
| <i>Gareml</i>        | -1.83 | 2.49E-02 | -2.32 | 1.28E-02 | -1.97 | 1.60E-02 |
| <i>Gata1</i>         | 2.73  | 3.48E-07 | 3.04  | 4.05E-07 | 3.84  | 1.55E-08 |
| <i>Gbp11_1</i>       | 2.56  | 5.64E-08 | 2.85  | 7.05E-08 | 2.49  | 3.95E-08 |
| <i>Gchl</i>          | -2.67 | 7.35E-07 | -3.41 | 2.87E-07 | -4.10 | 1.62E-08 |

|                 |       |          |       |          |       |          |
|-----------------|-------|----------|-------|----------|-------|----------|
| <i>Gdap2</i>    | -0.96 | 1.08E-07 | -1.12 | 9.49E-08 | -1.21 | 1.11E-08 |
| <i>Gdpd3</i>    | 2.07  | 3.99E-05 | 2.01  | 1.35E-04 | 1.88  | 7.71E-05 |
| <i>Gem</i>      | -3.15 | 8.47E-04 | -4.18 | 2.33E-04 | -5.05 | 1.58E-05 |
| <i>Gemin8</i>   | 0.63  | 4.89E-03 | 1.19  | 1.06E-04 | 1.22  | 2.84E-05 |
| <i>Gfi1</i>     | -1.83 | 2.34E-07 | -2.21 | 1.50E-07 | -2.48 | 1.42E-08 |
| <i>Gfod1</i>    | -2.29 | 5.71E-07 | -2.73 | 3.77E-07 | -3.74 | 8.23E-09 |
| <i>Gfpt2</i>    | -2.60 | 5.21E-05 | -2.57 | 1.47E-04 | -2.81 | 2.29E-05 |
| <i>Ggt1</i>     | -2.08 | 1.65E-05 | -2.30 | 1.90E-05 | -2.72 | 1.29E-06 |
| <i>Ghr</i>      | 1.61  | 6.53E-03 | 2.77  | 3.23E-04 | 3.34  | 2.34E-05 |
| <i>Gimap6</i>   | -1.17 | 4.00E-07 | -1.29 | 4.84E-07 | -1.02 | 8.85E-07 |
| <i>Ginm1</i>    | -0.96 | 5.44E-08 | -1.03 | 8.53E-08 | -1.12 | 9.44E-09 |
| <i>Gipc1</i>    | 1.06  | 2.37E-06 | 1.11  | 4.58E-06 | 1.09  | 1.44E-06 |
| <i>Gk5</i>      | -1.16 | 1.63E-06 | -1.27 | 2.13E-06 | -1.36 | 3.15E-07 |
| <i>Gkap1</i>    | 1.19  | 1.77E-02 | 1.33  | 1.83E-02 | 1.30  | 1.03E-02 |
| <i>Gla</i>      | -2.54 | 2.23E-07 | -3.28 | 9.10E-08 | -3.51 | 1.15E-08 |
| <i>Glce</i>     | -1.19 | 1.12E-06 | -1.39 | 8.51E-07 | -1.52 | 1.05E-07 |
| <i>Gli1</i>     | 1.72  | 6.85E-05 | 1.49  | 5.54E-04 | 1.75  | 5.22E-05 |
| <i>Glipr2</i>   | 2.06  | 2.09E-08 | 2.01  | 5.91E-08 | 1.29  | 4.08E-07 |
| <i>Gls2</i>     | -3.29 | 5.79E-03 | -4.89 | 8.39E-04 | -5.09 | 2.26E-04 |
| <i>Glt8d1</i>   | 1.67  | 4.21E-07 | 1.80  | 6.09E-07 | 2.10  | 4.40E-08 |
| <i>Gltscr11</i> | 1.28  | 6.80E-07 | 1.21  | 3.02E-06 | 1.48  | 1.43E-07 |
| <i>Gm10033</i>  | 1.66  | 7.47E-05 | 2.03  | 3.63E-05 | 1.75  | 4.03E-05 |
| <i>Gm10044</i>  | 1.25  | 5.40E-03 | 1.21  | 1.27E-02 | 1.49  | 1.52E-03 |
| <i>Gm10069</i>  | 1.80  | 2.70E-06 | 2.15  | 1.69E-06 | 2.59  | 9.11E-08 |
| <i>Gm10125</i>  | -2.45 | 1.42E-05 | -2.46 | 3.66E-05 | -2.07 | 5.02E-05 |
| <i>Gm10311</i>  | 1.24  | 1.30E-04 | 1.11  | 7.55E-04 | 2.01  | 1.77E-06 |
| <i>Gm10505</i>  | 1.54  | 1.11E-04 | 0.78  | 2.43E-02 | 2.87  | 4.52E-07 |
| <i>Gm10516</i>  | 1.66  | 6.94E-03 | 2.74  | 4.78E-04 | 2.41  | 4.73E-04 |
| <i>Gm10521</i>  | 2.49  | 1.65E-09 | 2.74  | 1.95E-09 | 2.48  | 3.36E-10 |
| <i>Gm10548</i>  | 1.28  | 1.55E-04 | 1.43  | 1.65E-04 | 1.39  | 6.97E-05 |
| <i>Gm10557</i>  | -1.79 | 7.51E-07 | -1.52 | 7.97E-06 | -1.71 | 8.10E-07 |
| <i>Gm10640</i>  | 1.38  | 1.95E-04 | 1.66  | 1.07E-04 | 2.81  | 3.66E-07 |
| <i>Gm10644</i>  | 1.56  | 4.48E-03 | 2.17  | 1.01E-03 | 1.91  | 1.04E-03 |
| <i>Gm10658</i>  | -1.82 | 1.57E-03 | -1.18 | 3.87E-02 | -2.29 | 2.50E-04 |
| <i>Gm10676</i>  | 1.28  | 1.33E-05 | 1.37  | 2.09E-05 | 1.27  | 1.23E-05 |
| <i>Gm10767</i>  | 1.13  | 1.40E-03 | 1.63  | 2.08E-04 | 1.29  | 4.48E-04 |
| <i>Gm10814</i>  | 1.50  | 6.42E-04 | 2.69  | 1.50E-05 | 2.50  | 8.23E-06 |
| <i>Gm11110</i>  | 0.83  | 1.50E-03 | 1.21  | 2.10E-04 | 1.04  | 2.44E-04 |

|                |       |          |       |          |       |          |
|----------------|-------|----------|-------|----------|-------|----------|
| <i>Gm11346</i> | 2.28  | 8.75E-07 | 2.07  | 5.33E-06 | 2.90  | 8.17E-08 |
| <i>Gm11427</i> | 2.28  | 8.67E-09 | 2.52  | 1.16E-08 | 2.82  | 8.30E-10 |
| <i>Gm11537</i> | 1.37  | 1.31E-05 | 1.89  | 2.45E-06 | 1.37  | 1.11E-05 |
| <i>Gm11707</i> | -2.34 | 2.59E-07 | -2.75 | 2.07E-07 | -2.25 | 2.48E-07 |
| <i>Gm11767</i> | 0.78  | 2.99E-02 | 1.13  | 7.25E-03 | 1.02  | 6.22E-03 |
| <i>Gm11769</i> | -1.74 | 3.24E-04 | -2.38 | 6.71E-05 | -2.69 | 7.34E-06 |
| <i>Gm11978</i> | -1.50 | 2.27E-02 | -2.12 | 6.00E-03 | -2.30 | 1.49E-03 |
| <i>Gm12107</i> | 1.53  | 5.52E-03 | 1.92  | 2.56E-03 | 1.67  | 2.76E-03 |
| <i>Gm12121</i> | 1.04  | 1.11E-02 | 1.28  | 6.21E-03 | 1.58  | 6.17E-04 |
| <i>Gm12216</i> | 0.71  | 6.04E-04 | 1.02  | 8.87E-05 | 3.23  | 2.41E-09 |
| <i>Gm12319</i> | 0.99  | 8.24E-04 | 1.10  | 8.82E-04 | 1.42  | 4.25E-05 |
| <i>Gm12367</i> | -1.88 | 4.55E-03 | -2.45 | 1.68E-03 | -1.49 | 1.69E-02 |
| <i>Gm12709</i> | -2.00 | 5.32E-03 | -3.97 | 7.73E-05 | -3.38 | 9.77E-05 |
| <i>Gm12743</i> | 2.88  | 2.76E-07 | 2.54  | 2.06E-06 | 3.07  | 1.11E-07 |
| <i>Gm12847</i> | 0.89  | 2.11E-03 | 1.20  | 5.32E-04 | 1.32  | 9.11E-05 |
| <i>Gm12942</i> | 1.68  | 8.77E-06 | 1.76  | 1.67E-05 | 2.03  | 1.41E-06 |
| <i>Gm13270</i> | 1.79  | 3.37E-03 | 2.24  | 1.56E-03 | 2.31  | 4.79E-04 |
| <i>Gm13307</i> | 1.28  | 2.11E-02 | 1.38  | 2.59E-02 | 1.82  | 2.31E-03 |
| <i>Gm13387</i> | 2.41  | 2.38E-04 | 2.41  | 5.74E-04 | 2.91  | 4.31E-05 |
| <i>Gm13421</i> | 1.71  | 6.80E-04 | 2.18  | 2.56E-04 | 2.79  | 1.04E-05 |
| <i>Gm14027</i> | 1.31  | 8.10E-04 | 2.11  | 4.72E-05 | 1.85  | 4.53E-05 |
| <i>Gm14085</i> | 2.12  | 1.60E-08 | 2.09  | 4.44E-08 | 2.18  | 5.90E-09 |
| <i>Gm14168</i> | -1.60 | 6.09E-05 | -1.93 | 3.35E-05 | -1.92 | 1.07E-05 |
| <i>Gm14308</i> | 1.12  | 4.18E-07 | 1.46  | 1.49E-07 | 1.32  | 7.50E-08 |
| <i>Gm14403</i> | 0.93  | 2.06E-03 | 1.05  | 1.91E-03 | 1.01  | 1.00E-03 |
| <i>Gm14420</i> | 1.11  | 1.16E-03 | 0.81  | 1.71E-02 | 1.17  | 7.03E-04 |
| <i>Gm14435</i> | 1.07  | 1.04E-03 | 0.86  | 9.41E-03 | 1.32  | 1.83E-04 |
| <i>Gm14455</i> | 1.55  | 1.46E-04 | 2.10  | 3.11E-05 | 2.17  | 7.02E-06 |
| <i>Gm14634</i> | -1.66 | 6.71E-03 | -1.88 | 6.22E-03 | -1.54 | 9.58E-03 |
| <i>Gm14703</i> | 1.56  | 7.56E-04 | 1.21  | 9.15E-03 | 2.20  | 4.25E-05 |
| <i>Gm15008</i> | -2.25 | 3.14E-03 | -1.62 | 3.90E-02 | -2.19 | 3.42E-03 |
| <i>Gm15327</i> | -2.10 | 1.45E-02 | -2.68 | 6.68E-03 | -2.28 | 8.16E-03 |
| <i>Gm15340</i> | -3.81 | 4.27E-06 | -5.77 | 3.97E-07 | -5.19 | 2.35E-07 |
| <i>Gm15506</i> | 2.22  | 3.71E-03 | 3.83  | 1.58E-04 | 3.70  | 7.06E-05 |
| <i>Gm15545</i> | 0.82  | 1.72E-03 | 1.34  | 9.43E-05 | 1.14  | 1.21E-04 |
| <i>Gm15674</i> | 2.19  | 6.04E-09 | 2.58  | 6.05E-09 | 2.73  | 5.15E-10 |
| <i>Gm15675</i> | 3.07  | 3.85E-04 | 2.56  | 3.25E-03 | 3.28  | 2.01E-04 |
| <i>Gm15706</i> | -1.21 | 5.20E-04 | -1.29 | 7.84E-04 | -1.24 | 3.86E-04 |

|                |       |          |       |          |       |          |
|----------------|-------|----------|-------|----------|-------|----------|
| <i>Gm15708</i> | 2.00  | 9.73E-05 | 2.10  | 1.69E-04 | 2.66  | 7.51E-06 |
| <i>Gm15728</i> | -2.71 | 5.05E-03 | -2.09 | 3.89E-02 | -3.18 | 1.54E-03 |
| <i>Gm15787</i> | -1.69 | 1.46E-02 | -1.59 | 3.52E-02 | -1.31 | 4.82E-02 |
| <i>Gm15834</i> | 1.32  | 2.36E-03 | 1.19  | 9.16E-03 | 1.71  | 3.04E-04 |
| <i>Gm15850</i> | 2.45  | 1.05E-03 | 1.98  | 9.23E-03 | 3.53  | 5.09E-05 |
| <i>Gm16001</i> | -1.74 | 1.82E-07 | -1.84 | 3.00E-07 | -1.74 | 1.18E-07 |
| <i>Gm1604b</i> | 2.20  | 1.17E-03 | 1.67  | 1.43E-02 | 2.07  | 1.66E-03 |
| <i>Gm16062</i> | -1.90 | 7.65E-04 | -1.14 | 3.53E-02 | -1.67 | 1.78E-03 |
| <i>Gm16083</i> | 2.43  | 6.34E-06 | 2.44  | 1.68E-05 | 2.95  | 9.35E-07 |
| <i>Gm16085</i> | 1.63  | 1.06E-02 | 1.64  | 1.95E-02 | 2.74  | 2.57E-04 |
| <i>Gm16124</i> | 1.00  | 8.82E-06 | 1.34  | 2.07E-06 | 1.23  | 1.13E-06 |
| <i>Gm16286</i> | -1.33 | 8.49E-07 | -1.79 | 2.20E-07 | -1.58 | 1.50E-07 |
| <i>Gm16302</i> | 1.25  | 2.20E-02 | 2.68  | 3.01E-04 | 1.50  | 7.36E-03 |
| <i>Gm16565</i> | -2.60 | 6.83E-05 | -3.64 | 1.08E-05 | -2.45 | 9.71E-05 |
| <i>Gm16576</i> | 1.71  | 1.80E-07 | 1.94  | 1.77E-07 | 2.05  | 2.64E-08 |
| <i>Gm16586</i> | 1.22  | 4.76E-07 | 1.59  | 1.66E-07 | 1.32  | 1.73E-07 |
| <i>Gm16754</i> | 1.60  | 1.44E-02 | 2.52  | 1.67E-03 | 1.49  | 2.00E-02 |
| <i>Gm16845</i> | 1.09  | 4.37E-04 | 0.59  | 4.15E-02 | 1.30  | 9.32E-05 |
| <i>Gm17167</i> | 1.23  | 5.84E-03 | 1.38  | 5.74E-03 | 1.69  | 5.72E-04 |
| <i>Gm17173</i> | 0.88  | 5.21E-03 | 1.95  | 3.06E-05 | 1.17  | 6.51E-04 |
| <i>Gm1720</i>  | 2.41  | 3.17E-03 | 3.59  | 4.13E-04 | 1.95  | 1.09E-02 |
| <i>Gm17231</i> | 1.03  | 9.44E-06 | 1.24  | 5.51E-06 | 1.02  | 8.36E-06 |
| <i>Gm17641</i> | -1.60 | 2.27E-04 | -1.97 | 1.08E-04 | -1.28 | 1.12E-03 |
| <i>Gm17655</i> | 1.02  | 1.37E-03 | 1.38  | 3.33E-04 | 1.06  | 9.21E-04 |
| <i>Gm1818</i>  | -1.78 | 7.20E-04 | -1.27 | 1.39E-02 | -2.07 | 1.94E-04 |
| <i>Gm18190</i> | 1.81  | 4.36E-04 | 2.16  | 2.72E-04 | 1.86  | 3.21E-04 |
| <i>Gm18752</i> | 1.87  | 1.06E-03 | 2.37  | 4.32E-04 | 2.29  | 1.99E-04 |
| <i>Gm19261</i> | 1.66  | 5.55E-03 | 2.79  | 3.11E-04 | 2.38  | 3.83E-04 |
| <i>Gm19557</i> | -2.77 | 1.79E-05 | -2.29 | 2.22E-04 | -3.90 | 7.43E-07 |
| <i>Gm20425</i> | -2.24 | 1.49E-02 | -4.20 | 4.87E-04 | -3.54 | 6.63E-04 |
| <i>Gm20457</i> | -1.25 | 2.28E-05 | -1.27 | 5.22E-05 | -1.25 | 1.88E-05 |
| <i>Gm20496</i> | 1.34  | 2.28E-03 | 1.58  | 1.59E-03 | 1.33  | 2.15E-03 |
| <i>Gm20517</i> | -1.02 | 2.19E-05 | -0.85 | 2.52E-04 | -1.06 | 1.31E-05 |
| <i>Gm20521</i> | 1.48  | 2.66E-04 | 1.27  | 1.92E-03 | 1.66  | 9.22E-05 |
| <i>Gm20627</i> | 2.97  | 1.13E-04 | 4.35  | 1.26E-05 | 4.72  | 1.79E-06 |
| <i>Gm20663</i> | 2.52  | 5.52E-09 | 2.97  | 5.57E-09 | 4.26  | 7.32E-11 |
| <i>Gm20939</i> | 2.19  | 6.02E-08 | 1.97  | 3.41E-07 | 2.14  | 4.15E-08 |
| <i>Gm21092</i> | -1.33 | 1.10E-06 | -1.46 | 1.40E-06 | -1.20 | 2.00E-06 |



|                |       |          |       |          |       |          |
|----------------|-------|----------|-------|----------|-------|----------|
| <i>Gm2163</i>  | 1.38  | 7.89E-05 | 1.33  | 2.77E-04 | 1.68  | 1.22E-05 |
| <i>Gm21811</i> | -1.45 | 7.06E-08 | -1.47 | 1.61E-07 | -1.31 | 9.42E-08 |
| <i>Gm21974</i> | 0.93  | 1.25E-03 | 1.08  | 9.76E-04 | 1.01  | 5.91E-04 |
| <i>Gm21987</i> | 1.69  | 9.09E-03 | 1.80  | 1.21E-02 | 1.67  | 9.00E-03 |
| <i>Gm26510</i> | 1.88  | 5.36E-06 | 1.77  | 2.43E-05 | 2.66  | 2.11E-07 |
| <i>Gm26541</i> | 1.12  | 7.02E-08 | 1.28  | 7.50E-08 | 1.30  | 1.30E-08 |
| <i>Gm26621</i> | -1.05 | 1.41E-02 | -1.22 | 1.17E-02 | -1.22 | 5.39E-03 |
| <i>Gm26637</i> | 2.16  | 3.14E-05 | 1.44  | 1.79E-03 | 2.71  | 3.73E-06 |
| <i>Gm26667</i> | -1.43 | 2.36E-03 | -1.39 | 6.01E-03 | -3.00 | 5.32E-06 |
| <i>Gm26685</i> | 1.14  | 1.05E-04 | 0.88  | 1.77E-03 | 2.01  | 6.45E-07 |
| <i>Gm26690</i> | -1.01 | 1.82E-04 | -0.73 | 4.27E-03 | -1.14 | 5.67E-05 |
| <i>Gm26740</i> | 2.25  | 1.40E-08 | 2.59  | 1.47E-08 | 3.41  | 3.98E-10 |
| <i>Gm26756</i> | -2.92 | 2.57E-03 | -3.29 | 2.48E-03 | -2.42 | 7.87E-03 |
| <i>Gm26767</i> | -1.64 | 2.04E-07 | -1.87 | 2.00E-07 | -1.77 | 7.25E-08 |
| <i>Gm26782</i> | 1.33  | 3.99E-07 | 1.83  | 9.80E-08 | 1.48  | 1.11E-07 |
| <i>Gm26804</i> | -1.37 | 4.41E-04 | -1.21 | 2.63E-03 | -1.92 | 2.52E-05 |
| <i>Gm26810</i> | 1.87  | 5.86E-04 | 3.09  | 2.58E-05 | 2.24  | 1.22E-04 |
| <i>Gm26826</i> | -1.18 | 7.79E-03 | -1.31 | 8.15E-03 | -1.68 | 6.35E-04 |
| <i>Gm26853</i> | -2.40 | 5.61E-04 | -2.44 | 1.19E-03 | -1.80 | 4.03E-03 |
| <i>Gm26879</i> | 1.57  | 3.06E-02 | 1.75  | 3.16E-02 | 1.40  | 4.85E-02 |
| <i>Gm26884</i> | -2.34 | 1.25E-03 | -3.15 | 3.12E-04 | -3.81 | 2.19E-05 |
| <i>Gm26908</i> | 3.01  | 2.97E-04 | 4.17  | 5.44E-05 | 2.78  | 4.84E-04 |
| <i>Gm26920</i> | 1.75  | 1.57E-05 | 1.61  | 8.14E-05 | 1.51  | 4.64E-05 |
| <i>Gm27042</i> | 1.69  | 2.22E-05 | 1.52  | 1.43E-04 | 1.01  | 1.21E-03 |
| <i>Gm28042</i> | 2.81  | 2.52E-08 | 2.84  | 5.77E-08 | 1.89  | 3.05E-07 |
| <i>Gm28046</i> | 2.12  | 2.85E-04 | 2.73  | 9.44E-05 | 2.10  | 2.68E-04 |
| <i>Gm28068</i> | 1.04  | 4.24E-04 | 1.08  | 7.72E-04 | 2.50  | 2.12E-07 |
| <i>Gm2822</i>  | 2.42  | 1.00E-03 | 2.21  | 4.10E-03 | 2.83  | 2.66E-04 |
| <i>Gm28557</i> | 1.34  | 2.05E-06 | 1.75  | 6.30E-07 | 1.58  | 3.71E-07 |
| <i>Gm28727</i> | 1.37  | 3.30E-06 | 1.56  | 3.05E-06 | 2.58  | 1.38E-08 |
| <i>Gm28869</i> | 1.00  | 2.38E-02 | 1.03  | 3.44E-02 | 1.60  | 1.15E-03 |
| <i>Gm28935</i> | 1.58  | 3.78E-04 | 2.35  | 3.87E-05 | 2.42  | 9.42E-06 |
| <i>Gm29642</i> | 1.29  | 3.36E-02 | 1.52  | 2.56E-02 | 2.08  | 1.82E-03 |
| <i>Gm30948</i> | 3.44  | 7.16E-06 | 3.93  | 6.44E-06 | 6.42  | 2.90E-08 |
| <i>Gm32391</i> | 1.63  | 2.96E-03 | 1.37  | 1.68E-02 | 2.19  | 3.14E-04 |
| <i>Gm33280</i> | 1.24  | 7.05E-07 | 2.06  | 4.55E-08 | 2.02  | 9.98E-09 |
| <i>Gm33994</i> | 1.65  | 7.73E-06 | 1.74  | 1.37E-05 | 1.56  | 1.04E-05 |
| <i>Gm3604</i>  | 1.48  | 3.24E-05 | 1.98  | 7.35E-06 | 1.97  | 2.24E-06 |

|                |       |          |       |          |       |          |
|----------------|-------|----------|-------|----------|-------|----------|
| <i>Gm37065</i> | 2.57  | 4.03E-07 | 2.70  | 7.38E-07 | 2.88  | 1.07E-07 |
| <i>Gm38250</i> | 1.87  | 6.03E-03 | 2.96  | 5.45E-04 | 1.57  | 1.52E-02 |
| <i>Gm38293</i> | 1.62  | 4.11E-03 | 1.40  | 1.86E-02 | 3.12  | 2.26E-05 |
| <i>Gm4070</i>  | 2.47  | 1.66E-05 | 2.33  | 7.34E-05 | 5.31  | 2.14E-08 |
| <i>Gm4258</i>  | -2.38 | 4.16E-02 | -3.50 | 1.01E-02 | -3.95 | 2.06E-03 |
| <i>Gm4419</i>  | 1.05  | 1.73E-02 | 2.54  | 7.86E-05 | 1.85  | 3.43E-04 |
| <i>Gm4577</i>  | 2.08  | 2.26E-03 | 2.49  | 1.45E-03 | 3.98  | 1.14E-05 |
| <i>Gm4951</i>  | 2.98  | 7.48E-04 | 2.97  | 1.79E-03 | 7.28  | 3.55E-07 |
| <i>Gm5106</i>  | -1.65 | 2.42E-03 | -2.95 | 7.03E-05 | -1.79 | 1.27E-03 |
| <i>Gm5113</i>  | 1.53  | 1.78E-06 | 1.44  | 8.20E-06 | 1.72  | 4.94E-07 |
| <i>Gm5141</i>  | 1.49  | 4.91E-05 | 1.76  | 3.29E-05 | 1.78  | 8.92E-06 |
| <i>Gm527</i>   | -1.10 | 3.19E-05 | -1.02 | 1.57E-04 | -1.24 | 9.25E-06 |
| <i>Gm5533</i>  | 1.76  | 2.10E-03 | 1.99  | 1.98E-03 | 2.61  | 8.95E-05 |
| <i>Gm5538</i>  | 1.32  | 7.16E-05 | 1.43  | 9.68E-05 | 3.41  | 1.93E-08 |
| <i>Gm5595</i>  | 1.95  | 1.61E-03 | 1.66  | 9.63E-03 | 1.85  | 2.10E-03 |
| <i>Gm5616</i>  | -1.10 | 3.30E-02 | -1.61 | 7.48E-03 | -1.34 | 1.07E-02 |
| <i>Gm590</i>   | -2.06 | 4.58E-03 | -1.81 | 1.89E-02 | -1.55 | 2.17E-02 |
| <i>Gm6225</i>  | -1.85 | 7.65E-03 | -2.17 | 5.72E-03 | -1.93 | 5.33E-03 |
| <i>Gm6297</i>  | 1.66  | 3.44E-04 | 1.39  | 2.91E-03 | 2.26  | 2.36E-05 |
| <i>Gm6483</i>  | -1.51 | 1.93E-07 | -1.54 | 4.33E-07 | -1.39 | 2.58E-07 |
| <i>Gm6904</i>  | 1.24  | 9.72E-04 | 1.17  | 3.26E-03 | 2.40  | 3.69E-06 |
| <i>Gm6939</i>  | 1.83  | 1.91E-07 | 1.67  | 1.09E-06 | 2.00  | 6.04E-08 |
| <i>Gm7598</i>  | 1.97  | 5.61E-04 | 1.63  | 4.72E-03 | 3.56  | 3.47E-06 |
| <i>Gm7967</i>  | 1.42  | 3.55E-04 | 1.93  | 7.89E-05 | 2.71  | 1.27E-06 |
| <i>Gm8251</i>  | 1.99  | 5.10E-08 | 2.13  | 8.13E-08 | 2.33  | 8.73E-09 |
| <i>Gm8898</i>  | 1.30  | 5.78E-07 | 1.38  | 1.03E-06 | 1.47  | 1.50E-07 |
| <i>Gm9581</i>  | 2.28  | 6.28E-05 | 2.65  | 4.68E-05 | 3.03  | 4.61E-06 |
| <i>Gm9967</i>  | 1.66  | 1.58E-02 | 1.70  | 2.52E-02 | 2.85  | 3.79E-04 |
| <i>Gmnn</i>    | -0.95 | 3.92E-06 | -1.24 | 1.17E-06 | -1.09 | 9.53E-07 |
| <i>Gna13</i>   | -1.48 | 1.34E-07 | -1.72 | 1.17E-07 | -1.45 | 1.03E-07 |
| <i>Gna15</i>   | 3.07  | 3.31E-04 | 3.33  | 4.26E-04 | 2.91  | 4.41E-04 |
| <i>Gnat1</i>   | -3.61 | 2.31E-03 | -5.25 | 3.45E-04 | -6.22 | 2.87E-05 |
| <i>Gne</i>     | 1.10  | 8.46E-08 | 1.06  | 2.81E-07 | 1.00  | 1.05E-07 |
| <i>Gng10</i>   | -0.85 | 3.62E-02 | -1.26 | 8.05E-03 | -1.16 | 6.25E-03 |
| <i>Gnl3</i>    | -1.06 | 1.31E-06 | -1.21 | 1.25E-06 | -2.05 | 5.22E-09 |
| <i>Gnrh1</i>   | 1.86  | 1.99E-04 | 2.01  | 2.65E-04 | 2.02  | 8.54E-05 |
| <i>Golgal</i>  | 0.94  | 2.03E-08 | 1.18  | 1.26E-08 | 1.05  | 4.17E-09 |
| <i>Golph3</i>  | -1.42 | 6.87E-08 | -1.50 | 1.23E-07 | -1.53 | 2.23E-08 |

|                 |       |          |       |          |       |          |
|-----------------|-------|----------|-------|----------|-------|----------|
| <i>Golt1b</i>   | -1.32 | 3.08E-07 | -1.43 | 4.30E-07 | -1.71 | 2.57E-08 |
| <i>Got1</i>     | -1.94 | 1.51E-07 | -2.31 | 1.08E-07 | -1.84 | 1.51E-07 |
| <i>Gpatch3</i>  | -1.27 | 3.52E-07 | -1.52 | 2.45E-07 | -1.25 | 2.78E-07 |
| <i>Gpbp1</i>    | -1.05 | 4.62E-08 | -1.08 | 9.67E-08 | -1.15 | 1.25E-08 |
| <i>Gpbp1l1</i>  | -1.10 | 7.35E-08 | -1.04 | 2.78E-07 | -1.00 | 8.77E-08 |
| <i>Gpn3</i>     | -1.03 | 1.11E-08 | -1.17 | 1.27E-08 | -1.08 | 3.40E-09 |
| <i>Gpnmb</i>    | -2.56 | 8.23E-05 | -2.89 | 7.87E-05 | -1.31 | 9.45E-03 |
| <i>Gpr132</i>   | -1.89 | 4.53E-08 | -2.26 | 3.73E-08 | -1.99 | 1.66E-08 |
| <i>Gpr137</i>   | 0.99  | 3.65E-04 | 1.30  | 1.06E-04 | 1.38  | 2.04E-05 |
| <i>Gpr146</i>   | 1.59  | 8.13E-03 | 1.90  | 5.64E-03 | 1.59  | 7.52E-03 |
| <i>Gpr180</i>   | 1.20  | 1.65E-07 | 1.28  | 2.54E-07 | 1.28  | 6.21E-08 |
| <i>Gpr182</i>   | 1.38  | 1.85E-06 | 1.50  | 2.62E-06 | 1.72  | 2.18E-07 |
| <i>Gpr3</i>     | -2.59 | 3.30E-02 | -3.44 | 1.36E-02 | -3.27 | 8.77E-03 |
| <i>Gpr68</i>    | -1.37 | 1.21E-02 | -1.37 | 2.30E-02 | -1.45 | 8.18E-03 |
| <i>Gprc5a</i>   | -2.67 | 2.65E-05 | -3.10 | 2.00E-05 | -3.89 | 8.16E-07 |
| <i>Gprc5b</i>   | 1.55  | 1.01E-08 | 1.48  | 3.25E-08 | 2.17  | 4.66E-10 |
| <i>Gpx7</i>     | -1.17 | 6.31E-03 | -1.09 | 1.89E-02 | -1.28 | 3.22E-03 |
| <i>Gramd1c</i>  | -1.10 | 2.58E-04 | -1.13 | 5.17E-04 | -1.57 | 1.11E-05 |
| <i>Gramd3</i>   | -2.37 | 1.66E-07 | -2.86 | 1.08E-07 | -2.38 | 1.03E-07 |
| <i>Grhl1</i>    | -1.76 | 2.79E-04 | -2.14 | 1.50E-04 | -2.75 | 5.75E-06 |
| <i>Grhl2</i>    | -2.22 | 1.55E-04 | -1.75 | 2.18E-03 | -1.10 | 1.72E-02 |
| <i>Grifin</i>   | 2.00  | 1.92E-07 | 2.63  | 7.17E-08 | 2.86  | 7.83E-09 |
| <i>Grm6</i>     | 1.64  | 5.54E-05 | 1.68  | 1.18E-04 | 2.34  | 2.16E-06 |
| <i>Gstt2</i>    | 1.27  | 3.20E-06 | 0.86  | 2.05E-04 | 1.56  | 4.05E-07 |
| <i>Gstz1</i>    | 1.17  | 2.52E-06 | 1.33  | 2.39E-06 | 1.41  | 3.79E-07 |
| <i>Gtf2ird1</i> | -1.70 | 2.28E-06 | -2.01 | 1.58E-06 | -2.69 | 3.70E-08 |
| <i>Gtpbp4</i>   | -1.01 | 1.29E-07 | -1.03 | 2.85E-07 | -1.29 | 1.18E-08 |
| <i>Gtse1</i>    | -0.77 | 1.36E-02 | -1.15 | 2.17E-03 | -1.01 | 2.24E-03 |
| <i>Guca1b</i>   | 0.92  | 4.43E-05 | 1.01  | 5.28E-05 | 1.22  | 3.28E-06 |
| <i>Gucd1</i>    | 1.85  | 1.04E-09 | 1.93  | 1.83E-09 | 2.11  | 9.44E-11 |
| <i>Gvin1</i>    | 2.67  | 1.67E-09 | 3.36  | 1.11E-09 | 4.31  | 2.23E-11 |
| <i>Gypc</i>     | -1.67 | 1.40E-08 | -1.89 | 1.60E-08 | -1.83 | 3.17E-09 |
| <i>H2-DMa</i>   | 0.94  | 4.09E-06 | 1.19  | 1.52E-06 | 1.44  | 8.48E-08 |
| <i>H2-K2</i>    | 1.70  | 2.13E-07 | 1.80  | 3.64E-07 | 2.21  | 1.74E-08 |
| <i>H2-Q1</i>    | 1.86  | 3.99E-06 | 1.45  | 8.68E-05 | 2.01  | 1.63E-06 |
| <i>H2-T23</i>   | 1.10  | 1.17E-07 | 1.10  | 2.98E-07 | 2.99  | 8.24E-11 |
| <i>H2afz</i>    | -1.67 | 1.54E-06 | -1.96 | 1.14E-06 | -2.32 | 7.33E-08 |
| <i>H3f3b</i>    | -1.21 | 3.83E-07 | -1.44 | 2.66E-07 | -1.27 | 1.79E-07 |

|                  |       |          |       |          |       |          |
|------------------|-------|----------|-------|----------|-------|----------|
| <i>H60b</i>      | -3.49 | 2.16E-04 | -4.88 | 3.63E-05 | -3.59 | 1.52E-04 |
| <i>Habp4</i>     | 1.29  | 7.18E-08 | 1.45  | 8.13E-08 | 1.60  | 8.17E-09 |
| <i>Hacl1</i>     | 1.07  | 6.27E-07 | 1.05  | 1.95E-06 | 1.40  | 4.82E-08 |
| <i>Hal</i>       | 2.33  | 1.95E-04 | 2.93  | 7.79E-05 | 1.87  | 9.43E-04 |
| <i>Haus3</i>     | -1.19 | 3.46E-05 | -0.93 | 6.64E-04 | -1.27 | 1.68E-05 |
| <i>Haus6</i>     | -1.11 | 1.37E-06 | -1.21 | 1.90E-06 | -1.18 | 6.40E-07 |
| <i>Hbp1</i>      | -1.94 | 2.03E-07 | -2.06 | 3.42E-07 | -1.90 | 1.65E-07 |
| <i>Hbs11</i>     | -1.60 | 1.02E-07 | -1.88 | 8.39E-08 | -1.77 | 2.74E-08 |
| <i>Hcn3</i>      | 1.55  | 4.79E-08 | 1.35  | 3.40E-07 | 1.17  | 2.63E-07 |
| <i>Hdac5</i>     | -1.04 | 5.20E-08 | -1.24 | 4.35E-08 | -1.07 | 2.34E-08 |
| <i>Hecw2</i>     | -2.00 | 3.33E-03 | -2.43 | 1.96E-03 | -2.67 | 3.76E-04 |
| <i>Hepacam2</i>  | 3.14  | 3.75E-04 | 2.68  | 2.72E-03 | 2.03  | 7.25E-03 |
| <i>Hexim1</i>    | -1.43 | 1.64E-06 | -1.85 | 5.42E-07 | -1.45 | 1.08E-06 |
| <i>Hey1</i>      | -2.62 | 8.92E-05 | -3.76 | 1.16E-05 | -3.81 | 3.01E-06 |
| <i>Hey2</i>      | -2.16 | 1.43E-03 | -2.62 | 7.92E-04 | -2.43 | 5.31E-04 |
| <i>Hif1a</i>     | -1.00 | 3.21E-06 | -1.07 | 4.84E-06 | -1.57 | 5.33E-08 |
| <i>Hif1an</i>    | -1.03 | 1.85E-08 | -1.12 | 2.63E-08 | -1.18 | 3.21E-09 |
| <i>Hif3a</i>     | -2.45 | 4.42E-04 | -2.25 | 1.89E-03 | -2.35 | 5.37E-04 |
| <i>Hint3</i>     | 1.18  | 4.13E-06 | 1.41  | 2.60E-06 | 1.41  | 7.23E-07 |
| <i>Hip1r</i>     | -1.59 | 2.04E-06 | -1.83 | 1.76E-06 | -1.58 | 1.66E-06 |
| <i>Hist1h1a</i>  | -2.73 | 1.75E-04 | -3.64 | 4.29E-05 | -3.86 | 7.97E-06 |
| <i>Hist1h1c</i>  | -1.83 | 9.02E-05 | -2.29 | 3.75E-05 | -1.60 | 2.35E-04 |
| <i>Hist1h1d</i>  | -2.40 | 1.71E-02 | -3.63 | 2.72E-03 | -3.28 | 2.28E-03 |
| <i>Hist1h1e</i>  | -3.56 | 3.18E-03 | -4.74 | 9.58E-04 | -3.98 | 1.34E-03 |
| <i>Hist1h2ac</i> | -2.63 | 4.82E-03 | -2.91 | 5.25E-03 | -3.44 | 6.82E-04 |
| <i>Hist1h2ak</i> | -2.71 | 1.48E-04 | -1.91 | 4.40E-03 | -2.31 | 4.54E-04 |
| <i>Hist1h3a</i>  | -3.28 | 2.37E-03 | -3.14 | 6.55E-03 | -3.08 | 3.30E-03 |
| <i>Hist1h3e</i>  | -2.69 | 5.29E-03 | -2.52 | 1.49E-02 | -2.76 | 4.03E-03 |
| <i>Hist1h3f</i>  | -1.54 | 3.18E-02 | -1.89 | 2.02E-02 | -2.58 | 1.26E-03 |
| <i>Hist1h4d</i>  | -1.67 | 3.37E-02 | -2.49 | 7.23E-03 | -2.62 | 2.26E-03 |
| <i>Hist1h4n</i>  | -3.02 | 7.87E-03 | -3.51 | 6.34E-03 | -3.70 | 1.92E-03 |
| <i>Hist2h2be</i> | 1.76  | 1.85E-06 | 1.66  | 8.24E-06 | 2.83  | 2.69E-08 |
| <i>Hist2h4</i>   | 2.00  | 1.16E-04 | 2.36  | 8.02E-05 | 3.50  | 8.05E-07 |
| <i>Hivep1</i>    | -1.64 | 6.63E-08 | -1.71 | 1.27E-07 | -1.09 | 1.21E-06 |
| <i>Hivep3</i>    | -1.48 | 1.72E-06 | -1.51 | 4.00E-06 | -2.20 | 4.60E-08 |
| <i>Hk2</i>       | -1.99 | 9.24E-03 | -1.93 | 2.04E-02 | -4.70 | 1.19E-05 |
| <i>Hlf</i>       | -1.37 | 2.98E-02 | -2.44 | 1.87E-03 | -2.17 | 1.75E-03 |
| <i>Hmcn2</i>     | 1.99  | 3.20E-04 | 1.66  | 2.69E-03 | 1.44  | 2.97E-03 |

|                 |       |          |       |          |       |          |
|-----------------|-------|----------|-------|----------|-------|----------|
| <i>Hmgb3</i>    | -1.68 | 2.03E-05 | -1.77 | 3.45E-05 | -2.68 | 2.84E-07 |
| <i>Hmmr</i>     | -1.29 | 2.79E-03 | -1.22 | 7.91E-03 | -1.44 | 1.14E-03 |
| <i>Hmox1</i>    | -1.25 | 3.22E-02 | -2.26 | 1.88E-03 | -2.20 | 8.98E-04 |
| <i>Hnrnpa1</i>  | -1.00 | 2.87E-08 | -1.08 | 4.51E-08 | -1.38 | 1.49E-09 |
| <i>Hnrnph1</i>  | -1.20 | 7.52E-07 | -1.29 | 1.17E-06 | -1.38 | 1.70E-07 |
| <i>Homer1</i>   | -1.40 | 8.67E-07 | -1.48 | 1.52E-06 | -1.86 | 5.92E-08 |
| <i>Homer3</i>   | 1.55  | 2.32E-07 | 1.42  | 1.29E-06 | 1.55  | 1.57E-07 |
| <i>Homez</i>    | 1.40  | 3.66E-06 | 1.40  | 9.61E-06 | 1.78  | 3.47E-07 |
| <i>Hook1</i>    | -1.11 | 1.99E-07 | -1.18 | 3.35E-07 | -1.39 | 2.14E-08 |
| <i>Hook3</i>    | 1.03  | 8.22E-08 | 1.20  | 7.09E-08 | 1.12  | 2.45E-08 |
| <i>Hpgds</i>    | -1.91 | 1.01E-05 | -2.17 | 9.29E-06 | -2.15 | 3.03E-06 |
| <i>Hsd11b1</i>  | -2.08 | 3.41E-06 | -2.37 | 3.20E-06 | -1.85 | 7.62E-06 |
| <i>Hsd17b14</i> | 1.58  | 1.47E-02 | 2.07  | 5.76E-03 | 1.49  | 1.87E-02 |
| <i>Hsd3b7</i>   | 1.14  | 1.71E-05 | 1.71  | 1.50E-06 | 1.44  | 1.76E-06 |
| <i>Hsp90aa1</i> | -1.38 | 2.44E-05 | -1.35 | 7.64E-05 | -1.97 | 9.19E-07 |
| <i>Hspa13</i>   | -0.90 | 1.10E-06 | -1.02 | 1.11E-06 | -1.06 | 2.03E-07 |
| <i>Hspa1b</i>   | -2.68 | 1.75E-03 | -2.81 | 2.81E-03 | -4.68 | 1.82E-05 |
| <i>Hspa2</i>    | -2.17 | 1.30E-05 | -2.96 | 2.71E-06 | -2.83 | 1.08E-06 |
| <i>Hspa4</i>    | -1.07 | 1.44E-08 | -1.11 | 2.83E-08 | -1.35 | 1.31E-09 |
| <i>Hspa4l</i>   | -2.04 | 3.04E-07 | -2.41 | 2.29E-07 | -2.29 | 8.00E-08 |
| <i>Hspa5</i>    | -2.06 | 2.35E-07 | -2.42 | 1.86E-07 | -2.69 | 1.90E-08 |
| <i>Hspbap1</i>  | 1.06  | 3.18E-08 | 1.10  | 6.38E-08 | 1.02  | 2.27E-08 |
| <i>Hyal2</i>    | 1.81  | 4.01E-05 | 1.27  | 1.61E-03 | 1.03  | 2.81E-03 |
| <i>Iah1</i>     | 0.89  | 6.78E-05 | 1.12  | 2.58E-05 | 1.05  | 1.35E-05 |
| <i>Iba57</i>    | -1.36 | 5.33E-07 | -1.71 | 2.31E-07 | -1.59 | 9.91E-08 |
| <i>Icos</i>     | -1.89 | 8.20E-07 | -2.35 | 3.90E-07 | -2.33 | 1.03E-07 |
| <i>Icosl</i>    | -1.60 | 1.49E-05 | -1.49 | 7.03E-05 | -1.91 | 2.59E-06 |
| <i>Ict1</i>     | 1.01  | 3.11E-08 | 0.98  | 9.10E-08 | 1.41  | 1.44E-09 |
| <i>Idh1</i>     | 2.08  | 4.68E-08 | 2.11  | 1.09E-07 | 1.91  | 5.10E-08 |
| <i>Ier3</i>     | -1.79 | 2.51E-02 | -1.80 | 4.19E-02 | -2.61 | 2.41E-03 |
| <i>Ier5</i>     | -1.35 | 4.54E-08 | -1.58 | 4.36E-08 | -1.48 | 1.28E-08 |
| <i>Ier5l</i>    | -2.51 | 6.98E-03 | -4.44 | 2.82E-04 | -4.51 | 8.39E-05 |
| <i>Ifi203</i>   | 1.39  | 5.94E-08 | 1.71  | 4.09E-08 | 2.83  | 2.70E-10 |
| <i>Ifit2</i>    | 0.91  | 2.38E-06 | 1.06  | 1.91E-06 | 2.55  | 7.04E-10 |
| <i>Ifitm10</i>  | 1.15  | 1.67E-03 | 0.71  | 4.97E-02 | 1.33  | 5.11E-04 |
| <i>Ifngr2</i>   | -1.90 | 1.62E-07 | -2.31 | 1.02E-07 | -2.63 | 8.42E-09 |
| <i>Ifrd1</i>    | -2.18 | 1.11E-07 | -2.77 | 5.48E-08 | -2.86 | 8.73E-09 |
| <i>Ift122</i>   | 1.01  | 2.04E-04 | 0.71  | 5.79E-03 | 1.67  | 2.43E-06 |

|                 |       |          |       |          |       |          |
|-----------------|-------|----------|-------|----------|-------|----------|
| <i>Ift52</i>    | 0.94  | 1.17E-05 | 1.01  | 1.73E-05 | 1.17  | 1.42E-06 |
| <i>Igsf23</i>   | -0.97 | 4.12E-05 | -1.02 | 6.91E-05 | -1.74 | 2.19E-07 |
| <i>Igsf8</i>    | -1.07 | 3.90E-05 | -1.39 | 1.21E-05 | -1.76 | 4.55E-07 |
| <i>Igtp</i>     | 0.73  | 2.49E-04 | 1.28  | 5.89E-06 | 3.79  | 4.66E-10 |
| <i>Ikbip</i>    | 1.19  | 4.21E-04 | 1.84  | 3.18E-05 | 1.03  | 1.14E-03 |
| <i>Ikzf2</i>    | -1.03 | 1.35E-02 | -0.88 | 4.99E-02 | -1.06 | 1.07E-02 |
| <i>Ikzf5</i>    | -1.79 | 1.88E-04 | -2.05 | 1.62E-04 | -1.70 | 2.44E-04 |
| <i>Il17rd</i>   | -0.73 | 1.09E-02 | -1.33 | 3.75E-04 | -1.31 | 1.52E-04 |
| <i>Il20ra</i>   | -1.29 | 1.99E-04 | -1.59 | 9.39E-05 | -1.22 | 2.58E-04 |
| <i>Il21r</i>    | -1.86 | 2.37E-08 | -2.38 | 1.31E-08 | -2.69 | 9.19E-10 |
| <i>Ildr1</i>    | -2.03 | 3.11E-03 | -2.06 | 5.87E-03 | -1.86 | 4.99E-03 |
| <i>Ilf3</i>     | -1.34 | 4.69E-09 | -1.44 | 7.23E-09 | -1.74 | 2.79E-10 |
| <i>Impg2</i>    | 0.89  | 2.46E-04 | 1.41  | 1.56E-05 | 1.46  | 3.30E-06 |
| <i>Incenp</i>   | -1.06 | 6.18E-08 | -1.11 | 1.18E-07 | -1.37 | 5.30E-09 |
| <i>Ing3</i>     | -1.44 | 4.08E-07 | -1.74 | 2.42E-07 | -1.56 | 1.45E-07 |
| <i>Ipmk</i>     | -1.17 | 1.19E-06 | -1.30 | 1.31E-06 | -1.24 | 5.36E-07 |
| <i>Iqcb1</i>    | -1.12 | 5.99E-06 | -1.42 | 2.21E-06 | -1.45 | 5.04E-07 |
| <i>Iqcd</i>     | 2.59  | 2.38E-05 | 1.24  | 1.24E-02 | 3.14  | 3.74E-06 |
| <i>Iqck</i>     | 1.93  | 7.13E-04 | 1.18  | 3.07E-02 | 2.46  | 9.09E-05 |
| <i>Irak1bp1</i> | -1.38 | 1.20E-02 | -1.47 | 1.57E-02 | -1.32 | 1.43E-02 |
| <i>Irak4</i>    | 0.95  | 5.64E-07 | 1.12  | 4.15E-07 | 1.22  | 5.04E-08 |
| <i>Irf2bp2</i>  | -1.79 | 1.42E-09 | -2.12 | 1.11E-09 | -1.90 | 2.03E-10 |
| <i>Irf4</i>     | -2.65 | 5.85E-06 | -3.64 | 1.16E-06 | -1.01 | 8.51E-03 |
| <i>Irs1</i>     | 1.18  | 2.07E-02 | 1.16  | 3.85E-02 | 1.00  | 4.25E-02 |
| <i>Irs2</i>     | -2.25 | 1.51E-07 | -2.67 | 1.13E-07 | -2.48 | 4.26E-08 |
| <i>Isca1</i>    | -1.31 | 2.61E-08 | -1.58 | 2.07E-08 | -1.55 | 3.88E-09 |
| <i>Isoc2b</i>   | 1.05  | 1.76E-03 | 1.12  | 2.41E-03 | 1.60  | 5.67E-05 |
| <i>Itga10</i>   | 0.97  | 2.76E-05 | 1.43  | 3.08E-06 | 1.40  | 9.96E-07 |
| <i>Itga2</i>    | 1.74  | 3.77E-04 | 1.99  | 3.28E-04 | 2.48  | 1.78E-05 |
| <i>Itga4</i>    | 1.19  | 2.43E-08 | 1.07  | 1.18E-07 | 1.71  | 9.72E-10 |
| <i>Itih4</i>    | -2.62 | 6.80E-03 | -2.27 | 2.81E-02 | -2.22 | 1.62E-02 |
| <i>Itih5</i>    | 3.26  | 2.87E-08 | 3.34  | 6.01E-08 | 1.93  | 1.05E-06 |
| <i>Itk</i>      | -1.00 | 1.24E-08 | -1.02 | 2.69E-08 | -1.35 | 6.87E-10 |
| <i>Itpkb</i>    | -1.79 | 2.41E-08 | -2.04 | 2.71E-08 | -2.34 | 1.83E-09 |
| <i>Itsn1</i>    | 2.25  | 5.21E-07 | 1.87  | 6.66E-06 | 1.96  | 1.23E-06 |
| <i>Izumo4</i>   | 1.45  | 3.62E-07 | 1.28  | 2.63E-06 | 1.83  | 3.58E-08 |
| <i>Jmjd1c</i>   | -1.59 | 1.15E-07 | -1.78 | 1.31E-07 | -1.70 | 4.15E-08 |
| <i>Jmy</i>      | -2.37 | 2.42E-07 | -2.94 | 1.31E-07 | -2.86 | 3.48E-08 |

|                |       |          |       |          |       |          |
|----------------|-------|----------|-------|----------|-------|----------|
| <i>Josd1</i>   | -1.58 | 3.68E-08 | -1.99 | 2.13E-08 | -2.08 | 2.61E-09 |
| <i>Josd2</i>   | 1.39  | 2.70E-07 | 1.47  | 4.63E-07 | 1.54  | 7.70E-08 |
| <i>Junb</i>    | -2.13 | 7.04E-08 | -2.71 | 3.80E-08 | -2.81 | 5.13E-09 |
| <i>Jund</i>    | -0.83 | 5.89E-05 | -1.22 | 6.09E-06 | -1.43 | 4.21E-07 |
| <i>Kank3</i>   | 1.88  | 1.65E-04 | 1.78  | 6.19E-04 | 1.30  | 2.34E-03 |
| <i>Kantr_2</i> | 1.50  | 1.14E-06 | 1.50  | 3.13E-06 | 1.46  | 1.09E-06 |
| <i>Kat2b</i>   | 1.54  | 7.94E-09 | 1.55  | 1.82E-08 | 1.72  | 1.43E-09 |
| <i>Katna1</i>  | -1.22 | 2.50E-07 | -1.40 | 2.31E-07 | -1.37 | 6.39E-08 |
| <i>Kbtbd11</i> | 1.49  | 4.36E-09 | 1.18  | 3.54E-08 | 2.63  | 4.94E-11 |
| <i>Kbtbd3</i>  | 1.75  | 1.67E-07 | 1.71  | 5.13E-07 | 1.13  | 4.54E-06 |
| <i>Kcna2</i>   | 1.10  | 2.41E-06 | 0.61  | 7.71E-04 | 1.94  | 1.65E-08 |
| <i>Kcnj14</i>  | -1.68 | 3.67E-02 | -2.06 | 2.35E-02 | -1.67 | 3.53E-02 |
| <i>Kcnk7</i>   | -1.65 | 2.19E-02 | -2.07 | 1.20E-02 | -2.19 | 3.84E-03 |
| <i>Kcnq5</i>   | -1.31 | 5.69E-03 | -1.27 | 1.35E-02 | -1.90 | 3.75E-04 |
| <i>Kctd10</i>  | -1.38 | 2.92E-08 | -1.38 | 7.31E-08 | -1.40 | 1.32E-08 |
| <i>Kctd12</i>  | -1.65 | 3.12E-07 | -1.98 | 2.06E-07 | -2.43 | 1.02E-08 |
| <i>Kctd12b</i> | -2.10 | 6.61E-06 | -2.42 | 5.43E-06 | -2.24 | 3.02E-06 |
| <i>Kctd21</i>  | 2.65  | 3.31E-06 | 3.15  | 2.16E-06 | 3.01  | 8.45E-07 |
| <i>Kdm2b</i>   | -2.23 | 2.18E-07 | -2.60 | 1.82E-07 | -3.00 | 1.37E-08 |
| <i>Kdm5a</i>   | -1.44 | 6.87E-08 | -1.52 | 1.18E-07 | -1.43 | 4.09E-08 |
| <i>Kdm6a</i>   | -1.25 | 2.26E-05 | -1.29 | 4.61E-05 | -1.27 | 1.61E-05 |
| <i>Kdm6b</i>   | -1.43 | 2.51E-07 | -1.76 | 1.41E-07 | -1.72 | 3.84E-08 |
| <i>Kif11</i>   | -2.12 | 8.02E-06 | -2.65 | 3.41E-06 | -3.21 | 1.75E-07 |
| <i>Kif13a</i>  | 1.27  | 8.08E-06 | 1.02  | 1.39E-04 | 1.05  | 3.37E-05 |
| <i>Kif18a</i>  | -2.05 | 8.82E-06 | -2.59 | 3.36E-06 | -2.31 | 2.50E-06 |
| <i>Kif18b</i>  | -1.62 | 2.24E-02 | -1.95 | 1.51E-02 | -1.56 | 2.54E-02 |
| <i>Kif20a</i>  | -1.01 | 1.12E-02 | -0.92 | 3.20E-02 | -1.28 | 2.28E-03 |
| <i>Kif22</i>   | 1.60  | 1.66E-07 | 1.61  | 4.21E-07 | 2.01  | 1.81E-08 |
| <i>Kif23</i>   | -1.52 | 1.22E-06 | -1.80 | 8.27E-07 | -2.01 | 8.20E-08 |
| <i>Kif3a</i>   | 1.04  | 1.44E-06 | 1.03  | 4.44E-06 | 1.95  | 7.06E-09 |
| <i>Kif4</i>    | -1.91 | 2.15E-03 | -1.85 | 5.54E-03 | -1.24 | 2.56E-02 |
| <i>Kif5c</i>   | 0.98  | 6.68E-05 | 1.10  | 6.75E-05 | 1.01  | 4.37E-05 |
| <i>Kif7</i>    | -1.24 | 1.14E-05 | -0.91 | 3.69E-04 | -1.45 | 2.36E-06 |
| <i>Kifc1</i>   | 2.49  | 1.13E-08 | 2.31  | 4.38E-08 | 2.37  | 6.88E-09 |
| <i>Kifc5b</i>  | 1.11  | 3.60E-07 | 0.76  | 2.30E-05 | 1.09  | 2.87E-07 |
| <i>Klc2</i>    | 1.04  | 3.68E-08 | 0.93  | 2.06E-07 | 1.03  | 2.17E-08 |
| <i>Klc3</i>    | 2.00  | 2.41E-08 | 1.89  | 8.45E-08 | 1.40  | 2.00E-07 |
| <i>Klf10</i>   | -1.47 | 3.69E-06 | -1.71 | 2.82E-06 | -2.16 | 1.03E-07 |

|                 |       |          |       |          |       |          |
|-----------------|-------|----------|-------|----------|-------|----------|
| <i>Klf4</i>     | -2.91 | 6.48E-05 | -4.68 | 3.27E-06 | -4.79 | 7.37E-07 |
| <i>Klhdc1</i>   | 2.45  | 1.67E-09 | 2.41  | 3.71E-09 | 2.00  | 1.36E-09 |
| <i>Klhdc4</i>   | -1.20 | 1.23E-06 | -1.22 | 2.97E-06 | -1.65 | 6.35E-08 |
| <i>Klhl11</i>   | -1.17 | 1.25E-06 | -1.30 | 1.46E-06 | -1.22 | 6.66E-07 |
| <i>Klhl12</i>   | -1.21 | 4.12E-08 | -1.33 | 5.48E-08 | -1.33 | 1.03E-08 |
| <i>Klhl20</i>   | 1.11  | 1.14E-07 | 1.37  | 7.05E-08 | 1.30  | 2.04E-08 |
| <i>Klhl26</i>   | 1.24  | 6.87E-08 | 1.21  | 2.09E-07 | 1.32  | 2.41E-08 |
| <i>Klhl35</i>   | 1.15  | 7.40E-03 | 1.54  | 2.35E-03 | 1.31  | 2.98E-03 |
| <i>Klhl42</i>   | 0.96  | 3.77E-06 | 1.04  | 5.51E-06 | 1.58  | 4.41E-08 |
| <i>Klhl8</i>    | 0.96  | 3.15E-04 | 1.30  | 6.69E-05 | 1.08  | 1.06E-04 |
| <i>Klrblf</i>   | -3.28 | 3.19E-04 | -2.00 | 1.86E-02 | -3.02 | 5.31E-04 |
| <i>Kmt2d</i>    | 0.98  | 1.02E-07 | 1.05  | 1.61E-07 | 1.10  | 2.54E-08 |
| <i>Kncn</i>     | -1.69 | 1.51E-02 | -1.70 | 2.70E-02 | -1.63 | 1.71E-02 |
| <i>Knstrn</i>   | 1.02  | 7.36E-05 | 1.05  | 1.51E-04 | 1.53  | 1.85E-06 |
| <i>Kpna1</i>    | -1.61 | 1.86E-07 | -1.84 | 1.80E-07 | -2.30 | 7.85E-09 |
| <i>Kras</i>     | -0.97 | 5.80E-06 | -1.00 | 1.21E-05 | -1.21 | 6.86E-07 |
| <i>Krcc1</i>    | 1.24  | 8.13E-06 | 1.14  | 4.38E-05 | 1.88  | 1.75E-07 |
| <i>l7Rn6</i>    | 1.22  | 1.83E-07 | 1.23  | 4.58E-07 | 1.35  | 5.10E-08 |
| <i>Lacc1</i>    | -2.36 | 1.33E-02 | -2.19 | 3.46E-02 | -2.77 | 4.66E-03 |
| <i>Lactb2</i>   | 1.40  | 5.48E-08 | 1.66  | 4.55E-08 | 1.57  | 1.26E-08 |
| <i>Lad1</i>     | -2.47 | 2.89E-03 | -3.52 | 5.05E-04 | -5.08 | 8.20E-06 |
| <i>Lamb3</i>    | 1.64  | 2.37E-08 | 1.85  | 2.80E-08 | 1.95  | 3.33E-09 |
| <i>Lamc1</i>    | 2.02  | 3.49E-07 | 1.65  | 5.00E-06 | 1.62  | 1.63E-06 |
| <i>Lamtor4</i>  | 1.19  | 1.05E-07 | 1.25  | 1.81E-07 | 1.51  | 9.95E-09 |
| <i>Lancl2</i>   | -1.38 | 7.22E-06 | -1.78 | 2.24E-06 | -1.65 | 1.17E-06 |
| <i>Larplb</i>   | -0.79 | 1.65E-05 | -1.02 | 5.53E-06 | -1.34 | 1.52E-07 |
| <i>Larp7</i>    | -1.14 | 1.97E-07 | -1.29 | 2.02E-07 | -1.26 | 5.66E-08 |
| <i>Lca5</i>     | 1.00  | 4.41E-06 | 0.96  | 1.77E-05 | 1.50  | 1.13E-07 |
| <i>Ldlr</i>     | 2.51  | 3.16E-09 | 2.71  | 5.51E-09 | 2.11  | 2.99E-09 |
| <i>Lect1</i>    | 1.10  | 1.00E-02 | 0.90  | 4.99E-02 | 2.56  | 1.64E-05 |
| <i>Lemd3</i>    | -1.51 | 5.41E-07 | -1.81 | 3.52E-07 | -1.70 | 1.48E-07 |
| <i>Leo1</i>     | -1.48 | 7.10E-08 | -1.58 | 1.14E-07 | -1.88 | 7.11E-09 |
| <i>Leprotl1</i> | 0.85  | 1.73E-08 | 1.02  | 1.40E-08 | 1.09  | 1.35E-09 |
| <i>Lfng</i>     | 1.68  | 2.70E-08 | 1.81  | 4.35E-08 | 1.08  | 4.72E-07 |
| <i>Lgals4</i>   | 1.11  | 3.90E-08 | 1.07  | 1.27E-07 | 1.31  | 6.06E-09 |
| <i>Lgals7</i>   | -1.96 | 1.61E-02 | -3.41 | 9.42E-04 | -2.90 | 1.22E-03 |
| <i>Lgalsl</i>   | -0.92 | 1.33E-03 | -1.00 | 1.68E-03 | -1.31 | 7.64E-05 |
| <i>Lif</i>      | -2.91 | 8.34E-04 | -4.24 | 1.10E-04 | -5.27 | 5.44E-06 |



|                 |       |          |       |          |       |          |
|-----------------|-------|----------|-------|----------|-------|----------|
| <i>Lincpint</i> | -1.82 | 1.58E-05 | -2.20 | 8.44E-06 | -2.62 | 5.42E-07 |
| <i>Litaf</i>    | -1.87 | 2.64E-07 | -2.41 | 1.11E-07 | -1.73 | 3.58E-07 |
| <i>Lman1l</i>   | -1.09 | 2.66E-03 | -0.87 | 2.06E-02 | -1.64 | 1.06E-04 |
| <i>Lman2l</i>   | 0.87  | 5.96E-06 | 1.14  | 1.74E-06 | 1.24  | 2.23E-07 |
| <i>Lmna</i>     | -3.08 | 9.75E-05 | -4.18 | 2.06E-05 | -5.10 | 1.10E-06 |
| <i>Lmnb1</i>    | -1.00 | 7.85E-09 | -1.08 | 1.12E-08 | -1.21 | 8.04E-10 |
| <i>Lmtk2</i>    | -1.22 | 5.84E-08 | -1.41 | 5.60E-08 | -1.37 | 1.37E-08 |
| <i>Lonrf1</i>   | -1.48 | 4.60E-07 | -1.94 | 1.52E-07 | -2.77 | 2.58E-09 |
| <i>Lonrf3</i>   | -3.23 | 3.49E-04 | -3.42 | 5.49E-04 | -6.01 | 1.58E-06 |
| <i>Loxl4</i>    | -1.13 | 2.37E-03 | -1.41 | 1.14E-03 | -1.59 | 1.59E-04 |
| <i>Lpar4</i>    | -2.86 | 4.05E-06 | -2.62 | 2.33E-05 | -2.47 | 1.18E-05 |
| <i>Lpar5</i>    | 2.44  | 5.01E-08 | 2.62  | 7.81E-08 | 2.14  | 7.70E-08 |
| <i>Lpin1</i>    | -1.56 | 4.43E-08 | -1.67 | 7.05E-08 | -2.02 | 3.69E-09 |
| <i>Lpin2</i>    | -1.39 | 2.98E-06 | -1.40 | 7.76E-06 | -1.24 | 6.50E-06 |
| <i>Lrig1</i>    | -1.66 | 2.03E-08 | -1.97 | 1.74E-08 | -1.95 | 3.04E-09 |
| <i>Lrp12</i>    | -1.46 | 3.35E-06 | -1.42 | 1.22E-05 | -1.06 | 4.22E-05 |
| <i>Lrpap1</i>   | -1.22 | 1.24E-08 | -1.30 | 2.01E-08 | -1.52 | 1.14E-09 |
| <i>Lrrc16b</i>  | 1.37  | 2.36E-02 | 2.40  | 1.48E-03 | 1.20  | 4.12E-02 |
| <i>Lrrc20</i>   | 1.44  | 7.84E-06 | 1.85  | 2.55E-06 | 1.30  | 1.53E-05 |
| <i>Lrrc23</i>   | -1.56 | 5.86E-04 | -1.74 | 6.11E-04 | -1.50 | 6.97E-04 |
| <i>Lrrc51</i>   | 2.19  | 1.68E-03 | 2.13  | 4.31E-03 | 2.39  | 7.98E-04 |
| <i>Lrrc61</i>   | 1.11  | 7.07E-06 | 0.97  | 5.72E-05 | 1.63  | 1.91E-07 |
| <i>Lrrc75b</i>  | 1.31  | 3.83E-06 | 1.55  | 2.61E-06 | 1.31  | 2.96E-06 |
| <i>Lsg1</i>     | -0.97 | 8.66E-08 | -1.06 | 1.17E-07 | -1.05 | 2.69E-08 |
| <i>Lsm10</i>    | 0.97  | 1.16E-04 | 1.16  | 7.11E-05 | 1.39  | 4.78E-06 |
| <i>Lsm8</i>     | -1.48 | 9.68E-08 | -1.45 | 2.82E-07 | -1.67 | 2.18E-08 |
| <i>Lst1</i>     | 1.81  | 2.04E-04 | 1.02  | 2.06E-02 | 1.97  | 8.62E-05 |
| <i>Ltv1</i>     | -1.08 | 2.67E-08 | -1.04 | 8.45E-08 | -1.47 | 1.46E-09 |
| <i>Luzp1</i>    | -2.23 | 6.88E-07 | -2.65 | 4.72E-07 | -2.95 | 4.77E-08 |
| <i>Lypd3</i>    | -2.34 | 2.70E-05 | -2.09 | 1.83E-04 | -2.28 | 2.85E-05 |
| <i>Lyrm9</i>    | 1.74  | 1.02E-08 | 1.86  | 1.66E-08 | 1.83  | 2.95E-09 |
| <i>Lysmd2</i>   | 1.15  | 4.76E-04 | 1.25  | 6.03E-04 | 2.35  | 9.54E-07 |
| <i>Lysmd3</i>   | -1.21 | 4.81E-06 | -1.33 | 6.19E-06 | -1.32 | 1.92E-06 |
| <i>Lztr1</i>    | 0.99  | 5.61E-09 | 1.03  | 9.75E-09 | 1.14  | 7.23E-10 |
| <i>Maf</i>      | -2.63 | 3.62E-05 | -3.43 | 1.04E-05 | -2.90 | 1.31E-05 |
| <i>Mafa</i>     | -1.61 | 6.98E-03 | -3.13 | 1.33E-04 | -1.41 | 1.40E-02 |
| <i>Maff</i>     | -2.20 | 3.40E-08 | -2.93 | 1.47E-08 | -2.36 | 1.03E-08 |
| <i>Magi2</i>    | 1.51  | 1.95E-03 | 1.45  | 5.47E-03 | 1.60  | 1.16E-03 |

|                 |       |          |       |          |       |          |
|-----------------|-------|----------|-------|----------|-------|----------|
| <i>Magoh</i>    | -0.91 | 1.88E-06 | -1.01 | 2.17E-06 | -1.23 | 1.05E-07 |
| <i>Mansc1</i>   | 1.35  | 1.69E-04 | 1.56  | 1.35E-04 | 1.47  | 7.51E-05 |
| <i>Mansc4</i>   | 2.09  | 1.30E-03 | 2.97  | 2.21E-04 | 2.42  | 3.96E-04 |
| <i>Maoa</i>     | -1.59 | 8.19E-03 | -1.60 | 1.55E-02 | -3.06 | 6.02E-05 |
| <i>Map10</i>    | 1.00  | 2.50E-03 | 0.77  | 2.44E-02 | 1.75  | 2.81E-05 |
| <i>Map1lc3a</i> | -1.95 | 3.90E-07 | -2.54 | 1.42E-07 | -2.76 | 1.64E-08 |
| <i>Map1lc3b</i> | -2.39 | 7.49E-07 | -2.12 | 5.53E-06 | -2.53 | 3.35E-07 |
| <i>Map2</i>     | -2.46 | 1.69E-04 | -2.14 | 1.19E-03 | -3.40 | 9.52E-06 |
| <i>Map2k3</i>   | -0.90 | 6.47E-08 | -1.09 | 4.61E-08 | -1.26 | 3.08E-09 |
| <i>Map2k3os</i> | 1.54  | 3.04E-03 | 1.88  | 1.68E-03 | 1.05  | 2.65E-02 |
| <i>Map3k1</i>   | -1.53 | 2.08E-08 | -1.86 | 1.58E-08 | -1.69 | 4.65E-09 |
| <i>Map3k14</i>  | -1.63 | 1.24E-08 | -1.94 | 1.05E-08 | -1.51 | 9.02E-09 |
| <i>Map3k15</i>  | 1.59  | 3.07E-06 | 1.56  | 9.96E-06 | 1.72  | 1.21E-06 |
| <i>Map3k2</i>   | -1.19 | 3.73E-07 | -1.36 | 3.52E-07 | -1.19 | 2.68E-07 |
| <i>Map3k6</i>   | -1.66 | 2.25E-02 | -2.36 | 5.69E-03 | -1.99 | 7.54E-03 |
| <i>Map3k8</i>   | -1.56 | 1.37E-06 | -1.88 | 8.24E-07 | -2.09 | 8.55E-08 |
| <i>Map3k9</i>   | -1.14 | 1.58E-07 | -1.30 | 1.56E-07 | -1.19 | 6.96E-08 |
| <i>Map4k5</i>   | -1.36 | 1.23E-06 | -1.45 | 2.06E-06 | -1.50 | 4.07E-07 |
| <i>Mapk6</i>    | -0.94 | 9.18E-07 | -1.02 | 1.20E-06 | -1.10 | 1.66E-07 |
| <i>Mapk8</i>    | -1.12 | 3.52E-07 | -1.24 | 4.29E-07 | -1.28 | 8.00E-08 |
| <i>March6</i>   | -1.11 | 5.99E-08 | -1.16 | 1.07E-07 | -1.07 | 4.32E-08 |
| <i>March7</i>   | -1.15 | 3.05E-07 | -1.21 | 5.48E-07 | -1.19 | 1.65E-07 |
| <i>Marcks11</i> | -2.50 | 4.88E-07 | -2.78 | 5.61E-07 | -3.60 | 1.75E-08 |
| <i>Marveld1</i> | 1.18  | 4.48E-08 | 1.06  | 2.27E-07 | 1.26  | 1.43E-08 |
| <i>Marveld2</i> | -0.88 | 4.14E-02 | -1.05 | 2.94E-02 | -1.39 | 2.81E-03 |
| <i>Masp2</i>    | 1.40  | 2.31E-03 | 1.96  | 4.49E-04 | 1.48  | 1.38E-03 |
| <i>Mast1</i>    | 1.77  | 2.80E-03 | 2.02  | 2.54E-03 | 2.05  | 9.26E-04 |
| <i>Matn1</i>    | -1.52 | 7.74E-03 | -1.82 | 5.16E-03 | -1.55 | 6.37E-03 |
| <i>Mavs</i>     | 1.37  | 3.02E-07 | 1.45  | 5.31E-07 | 1.35  | 2.39E-07 |
| <i>Mblac2</i>   | 1.44  | 8.83E-07 | 1.30  | 5.83E-06 | 1.66  | 1.99E-07 |
| <i>Mcam</i>     | -1.90 | 1.38E-03 | -3.73 | 1.67E-05 | -3.38 | 1.16E-05 |
| <i>Mcee</i>     | 1.66  | 5.31E-08 | 1.57  | 2.00E-07 | 1.47  | 7.98E-08 |
| <i>Mcm4</i>     | -1.13 | 1.52E-07 | -1.23 | 2.07E-07 | -1.14 | 8.77E-08 |
| <i>Mcm5</i>     | -1.11 | 1.59E-08 | -1.14 | 3.25E-08 | -1.34 | 1.95E-09 |
| <i>Mctp2</i>    | -1.33 | 9.95E-08 | -1.58 | 7.63E-08 | -1.40 | 4.02E-08 |
| <i>Mdk</i>      | 1.04  | 3.62E-03 | 1.23  | 2.47E-03 | 1.34  | 5.33E-04 |
| <i>Mecp2</i>    | 0.92  | 2.18E-08 | 1.05  | 2.31E-08 | 1.26  | 1.17E-09 |
| <i>Med11</i>    | -0.93 | 4.62E-07 | -1.08 | 3.64E-07 | -1.01 | 1.55E-07 |

|                 |       |          |       |          |       |          |
|-----------------|-------|----------|-------|----------|-------|----------|
| <i>Med12l</i>   | -1.57 | 4.88E-06 | -1.51 | 1.77E-05 | -1.82 | 1.07E-06 |
| <i>Med13</i>    | -1.41 | 4.69E-08 | -1.43 | 1.10E-07 | -1.46 | 2.03E-08 |
| <i>Med16</i>    | -1.47 | 1.43E-07 | -1.69 | 1.36E-07 | -1.49 | 8.03E-08 |
| <i>Med20</i>    | -0.96 | 2.86E-02 | -1.45 | 5.22E-03 | -1.16 | 9.39E-03 |
| <i>Med26</i>    | -0.96 | 2.23E-06 | -1.12 | 1.71E-06 | -1.24 | 1.97E-07 |
| <i>Med7</i>     | -2.22 | 5.21E-06 | -2.67 | 3.05E-06 | -1.97 | 1.20E-05 |
| <i>Mef2d</i>    | -1.21 | 2.52E-08 | -1.33 | 3.47E-08 | -1.45 | 3.48E-09 |
| <i>Megf9</i>    | -1.36 | 1.75E-06 | -1.39 | 4.07E-06 | -1.70 | 1.98E-07 |
| <i>Mettl20</i>  | 3.00  | 7.17E-09 | 3.32  | 9.51E-09 | 2.79  | 4.48E-09 |
| <i>Mettl21a</i> | 0.98  | 1.47E-05 | 1.11  | 1.31E-05 | 1.27  | 1.20E-06 |
| <i>Mettl4</i>   | 1.20  | 4.04E-06 | 1.22  | 9.47E-06 | 1.62  | 2.40E-07 |
| <i>Mettl6</i>   | -1.07 | 2.17E-07 | -1.16 | 3.10E-07 | -1.26 | 3.81E-08 |
| <i>Mex3c</i>    | -1.21 | 5.36E-07 | -1.33 | 7.04E-07 | -1.38 | 1.25E-07 |
| <i>Mfsd10</i>   | -0.98 | 2.85E-05 | -1.04 | 4.64E-05 | -1.23 | 3.30E-06 |
| <i>Mfsd6</i>    | -1.36 | 6.61E-09 | -1.62 | 6.31E-09 | -1.47 | 1.46E-09 |
| <i>Mfsd7c</i>   | 1.60  | 2.20E-02 | 2.01  | 1.19E-02 | 1.97  | 6.31E-03 |
| <i>Mgat4a</i>   | -1.15 | 2.18E-08 | -1.01 | 1.24E-07 | -1.32 | 3.75E-09 |
| <i>Mgea5</i>    | -1.27 | 3.43E-08 | -1.26 | 8.67E-08 | -1.17 | 3.16E-08 |
| <i>Mgst2</i>    | 1.94  | 2.77E-09 | 2.03  | 5.57E-09 | 2.29  | 2.99E-10 |
| <i>Mgst3</i>    | 1.23  | 4.16E-04 | 1.04  | 3.16E-03 | 1.23  | 3.66E-04 |
| <i>Mical2</i>   | 2.20  | 2.65E-05 | 1.21  | 5.69E-03 | 2.84  | 2.44E-06 |
| <i>Micall1</i>  | 1.19  | 3.03E-09 | 1.14  | 8.67E-09 | 1.33  | 4.66E-10 |
| <i>Mid1</i>     | -0.96 | 6.81E-04 | -1.30 | 1.59E-04 | -1.49 | 1.57E-05 |
| <i>Miip</i>     | 1.25  | 7.69E-08 | 1.22  | 2.39E-07 | 1.45  | 1.46E-08 |
| <i>Mina</i>     | 1.68  | 4.19E-10 | 1.83  | 5.67E-10 | 1.70  | 5.19E-11 |
| <i>Mir142hg</i> | 1.08  | 2.40E-08 | 1.14  | 4.36E-08 | 1.28  | 3.54E-09 |
| <i>Mir22hg</i>  | -2.89 | 8.39E-03 | -2.68 | 2.39E-02 | -3.47 | 2.40E-03 |
| <i>Mis18bp1</i> | -1.45 | 1.32E-03 | -1.37 | 4.17E-03 | -1.57 | 6.57E-04 |
| <i>Mknk2</i>    | -0.96 | 7.27E-08 | -1.11 | 7.01E-08 | -1.15 | 1.13E-08 |
| <i>Mlycd</i>    | 1.10  | 9.81E-06 | 0.89  | 1.56E-04 | 1.33  | 1.54E-06 |
| <i>Mmgt2</i>    | 1.63  | 3.27E-09 | 1.87  | 3.71E-09 | 1.62  | 9.96E-10 |
| <i>Mn1</i>      | -1.27 | 3.98E-03 | -0.97 | 3.45E-02 | -1.89 | 1.94E-04 |
| <i>Mob2</i>     | -1.48 | 2.18E-08 | -1.64 | 2.72E-08 | -1.51 | 8.72E-09 |
| <i>Mob3a</i>    | 1.41  | 2.72E-08 | 1.45  | 5.76E-08 | 1.65  | 4.49E-09 |
| <i>Mocos</i>    | 1.28  | 1.30E-04 | 1.07  | 1.27E-03 | 1.28  | 1.16E-04 |
| <i>Morf4l2</i>  | -2.04 | 4.52E-07 | -2.32 | 4.38E-07 | -2.77 | 2.57E-08 |
| <i>Mov10</i>    | 2.45  | 7.42E-09 | 2.70  | 9.93E-09 | 1.38  | 2.19E-07 |
| <i>Mphosph6</i> | -0.89 | 1.99E-04 | -1.11 | 8.78E-05 | -1.51 | 1.83E-06 |

|                |       |          |       |          |       |          |
|----------------|-------|----------|-------|----------|-------|----------|
| <i>Mpp1</i>    | 0.92  | 8.98E-08 | 1.04  | 9.92E-08 | 1.03  | 2.18E-08 |
| <i>Mpp2</i>    | -1.08 | 1.80E-03 | -1.25 | 1.38E-03 | -1.89 | 1.78E-05 |
| <i>Mpp4</i>    | 1.51  | 2.04E-04 | 2.24  | 2.14E-05 | 2.25  | 6.18E-06 |
| <i>Mpv17l</i>  | 1.49  | 1.13E-02 | 1.68  | 1.06E-02 | 2.20  | 7.48E-04 |
| <i>Mpz11</i>   | -2.64 | 4.95E-05 | -3.55 | 1.12E-05 | -3.87 | 1.54E-06 |
| <i>Mpz13</i>   | -1.48 | 1.39E-07 | -1.58 | 2.28E-07 | -2.32 | 3.01E-09 |
| <i>Mroh3</i>   | -1.39 | 1.01E-02 | -2.05 | 1.77E-03 | -1.19 | 2.18E-02 |
| <i>Mroh8</i>   | 0.88  | 4.54E-02 | 1.04  | 3.52E-02 | 1.87  | 3.69E-04 |
| <i>Mrpl14</i>  | 1.03  | 3.41E-06 | 1.13  | 4.37E-06 | 1.13  | 1.17E-06 |
| <i>Mrpl34</i>  | 0.94  | 6.52E-05 | 1.13  | 3.68E-05 | 1.04  | 2.42E-05 |
| <i>Mrps22</i>  | -1.11 | 1.80E-07 | -1.08 | 6.09E-07 | -1.22 | 5.47E-08 |
| <i>Mrvi1</i>   | -1.01 | 2.50E-04 | -1.22 | 1.43E-04 | -1.39 | 1.49E-05 |
| <i>Ms4a4b</i>  | 2.24  | 7.90E-10 | 2.47  | 1.11E-09 | 2.21  | 1.81E-10 |
| <i>Ms4a4c</i>  | 2.36  | 6.21E-08 | 2.63  | 7.74E-08 | 2.32  | 4.09E-08 |
| <i>Ms4a6b</i>  | 1.28  | 4.19E-10 | 1.54  | 2.39E-10 | 1.27  | 5.19E-11 |
| <i>Ms4a6c</i>  | 3.10  | 2.62E-09 | 3.31  | 4.19E-09 | 2.87  | 1.15E-09 |
| <i>Ms4a6d</i>  | 2.94  | 3.30E-07 | 3.39  | 2.92E-07 | 1.57  | 5.37E-05 |
| <i>Msh2</i>    | 1.06  | 1.92E-08 | 1.03  | 5.48E-08 | 1.10  | 6.84E-09 |
| <i>Msra</i>    | -1.11 | 1.82E-07 | -1.18 | 2.91E-07 | -1.12 | 1.04E-07 |
| <i>Mss51</i>   | 1.42  | 4.41E-05 | 1.93  | 8.99E-06 | 1.71  | 7.82E-06 |
| <i>Mt1</i>     | -2.97 | 4.55E-05 | -3.05 | 9.58E-05 | -2.91 | 4.59E-05 |
| <i>Mtbp</i>    | -1.21 | 3.22E-08 | -1.22 | 7.74E-08 | -1.48 | 3.88E-09 |
| <i>Mtcp1_1</i> | 1.06  | 2.46E-06 | 1.32  | 1.13E-06 | 1.40  | 1.76E-07 |
| <i>Mterf1b</i> | 1.71  | 6.79E-07 | 1.97  | 5.89E-07 | 2.06  | 1.02E-07 |
| <i>Mtjfp1</i>  | 1.66  | 4.39E-03 | 2.55  | 4.61E-04 | 1.68  | 3.67E-03 |
| <i>Mtjfr2</i>  | -1.68 | 3.57E-05 | -1.59 | 1.48E-04 | -2.11 | 4.21E-06 |
| <i>Mthfsd</i>  | 1.14  | 2.56E-04 | 1.10  | 8.09E-04 | 1.34  | 6.32E-05 |
| <i>Mtmr10</i>  | -2.03 | 2.67E-06 | -2.29 | 2.70E-06 | -1.96 | 2.86E-06 |
| <i>Mtmr12</i>  | -1.04 | 2.43E-08 | -1.14 | 3.43E-08 | -1.17 | 5.27E-09 |
| <i>Mtmr2</i>   | -1.08 | 1.32E-07 | -1.15 | 2.16E-07 | -1.15 | 5.06E-08 |
| <i>Mtss11</i>  | -1.43 | 3.15E-03 | -1.34 | 9.51E-03 | -1.76 | 6.34E-04 |
| <i>Muc3</i>    | -2.03 | 3.71E-03 | -1.62 | 2.61E-02 | -1.97 | 4.14E-03 |
| <i>Mustn1</i>  | 1.27  | 1.66E-04 | 1.27  | 3.91E-04 | 1.51  | 3.27E-05 |
| <i>Mut</i>     | 1.00  | 9.08E-06 | 1.12  | 9.27E-06 | 1.34  | 5.72E-07 |
| <i>Mvb12a</i>  | 1.07  | 2.37E-06 | 0.99  | 1.30E-05 | 1.20  | 6.69E-07 |
| <i>Mx1</i>     | -1.92 | 8.92E-03 | -2.93 | 1.19E-03 | -1.45 | 3.71E-02 |
| <i>Mx2</i>     | -1.91 | 2.99E-06 | -2.24 | 2.19E-06 | -1.13 | 2.15E-04 |
| <i>Mxd1</i>    | -1.69 | 9.14E-07 | -1.92 | 9.05E-07 | -2.38 | 3.89E-08 |

|                |       |          |       |          |       |          |
|----------------|-------|----------|-------|----------|-------|----------|
| <i>Mxd3</i>    | -1.98 | 1.71E-03 | -2.33 | 1.24E-03 | -2.53 | 2.45E-04 |
| <i>Mxd4</i>    | -1.11 | 5.62E-08 | -1.22 | 7.81E-08 | -1.34 | 7.98E-09 |
| <i>Mxi1</i>    | -1.15 | 1.74E-07 | -1.35 | 1.40E-07 | -1.16 | 1.04E-07 |
| <i>Myb</i>     | -3.14 | 1.23E-04 | -4.38 | 2.08E-05 | -4.39 | 6.15E-06 |
| <i>Mybl1</i>   | -1.07 | 2.52E-04 | -1.05 | 6.95E-04 | -1.09 | 1.90E-04 |
| <i>Myl4</i>    | -1.94 | 5.78E-03 | -2.27 | 4.45E-03 | -3.18 | 1.39E-04 |
| <i>Mylip</i>   | -1.29 | 1.62E-07 | -1.31 | 3.87E-07 | -1.00 | 9.16E-07 |
| <i>Mylpf</i>   | 0.94  | 1.81E-05 | 1.27  | 3.79E-06 | 1.19  | 1.82E-06 |
| <i>Myo1a</i>   | 1.66  | 4.46E-05 | 1.98  | 2.74E-05 | 2.44  | 1.33E-06 |
| <i>Myof</i>    | 3.04  | 1.58E-03 | 3.01  | 3.71E-03 | 1.89  | 2.62E-02 |
| <i>Mypop</i>   | 1.68  | 3.38E-05 | 1.28  | 7.37E-04 | 1.84  | 1.34E-05 |
| <i>Mypopos</i> | 1.73  | 5.04E-05 | 1.95  | 4.77E-05 | 1.91  | 1.76E-05 |
| <i>Myrfl</i>   | 1.18  | 1.36E-02 | 1.16  | 2.73E-02 | 2.17  | 1.78E-04 |
| <i>Mzfl</i>    | 1.34  | 1.67E-03 | 0.88  | 3.89E-02 | 1.88  | 1.10E-04 |
| <i>N4bp2l1</i> | 0.84  | 2.48E-06 | 1.13  | 6.09E-07 | 1.63  | 8.67E-09 |
| <i>N6amt2</i>  | 0.98  | 8.02E-06 | 1.09  | 9.31E-06 | 1.21  | 1.03E-06 |
| <i>Naalad2</i> | 1.87  | 5.97E-05 | 0.96  | 1.51E-02 | 2.77  | 1.69E-06 |
| <i>Nab1</i>    | -1.37 | 1.80E-07 | -1.55 | 1.86E-07 | -1.77 | 1.53E-08 |
| <i>Nab2</i>    | -1.06 | 6.27E-07 | -1.32 | 3.11E-07 | -1.70 | 1.03E-08 |
| <i>Nacad</i>   | 1.73  | 4.39E-07 | 1.91  | 5.27E-07 | 2.34  | 2.54E-08 |
| <i>Nacc2</i>   | 2.41  | 5.44E-09 | 2.72  | 6.27E-09 | 3.72  | 1.18E-10 |
| <i>Nadsyn1</i> | 1.25  | 2.18E-06 | 1.27  | 5.45E-06 | 1.49  | 3.73E-07 |
| <i>Naglu</i>   | 1.33  | 1.89E-07 | 1.30  | 5.89E-07 | 1.42  | 7.35E-08 |
| <i>Napa</i>    | -1.12 | 1.66E-08 | -1.19 | 2.76E-08 | -1.37 | 1.83E-09 |
| <i>Napepld</i> | 2.56  | 5.94E-08 | 2.82  | 7.86E-08 | 1.43  | 4.83E-06 |
| <i>Nasp</i>    | -1.16 | 2.01E-07 | -1.23 | 3.32E-07 | -1.44 | 2.31E-08 |
| <i>Ncapg2</i>  | -2.29 | 8.75E-06 | -2.61 | 7.74E-06 | -2.56 | 2.67E-06 |
| <i>Ncbp1</i>   | -1.30 | 9.42E-09 | -1.46 | 1.11E-08 | -1.65 | 7.63E-10 |
| <i>Ncln</i>    | 1.87  | 2.12E-09 | 1.97  | 3.71E-09 | 2.32  | 1.53E-10 |
| <i>Ndel1</i>   | -1.25 | 5.20E-08 | -1.45 | 5.01E-08 | -1.45 | 9.54E-09 |
| <i>Ndnf</i>    | -1.82 | 1.53E-03 | -2.98 | 8.45E-05 | -2.64 | 7.43E-05 |
| <i>Ndrg2</i>   | 1.21  | 1.59E-07 | 1.26  | 3.00E-07 | 1.06  | 3.03E-07 |
| <i>Nebl</i>    | -3.05 | 3.74E-04 | -3.44 | 3.54E-04 | -4.22 | 2.21E-05 |
| <i>Neill</i>   | -0.97 | 5.67E-07 | -1.19 | 3.21E-07 | -1.08 | 1.69E-07 |
| <i>Neil2</i>   | 1.72  | 6.26E-04 | 1.62  | 2.26E-03 | 2.44  | 3.19E-05 |
| <i>Nek2</i>    | -2.10 | 7.26E-04 | -2.68 | 2.77E-04 | -3.14 | 2.46E-05 |
| <i>Neto2</i>   | -1.11 | 5.57E-08 | -1.02 | 2.52E-07 | -1.42 | 4.94E-09 |
| <i>Neurl3</i>  | -2.29 | 5.62E-07 | -2.71 | 3.94E-07 | -1.49 | 1.69E-05 |

|                |       |          |       |          |       |          |
|----------------|-------|----------|-------|----------|-------|----------|
| <i>Nfe2l3</i>  | 0.90  | 6.48E-03 | 1.71  | 1.40E-04 | 1.55  | 1.06E-04 |
| <i>Nfil3</i>   | -2.07 | 3.38E-06 | -2.71 | 9.94E-07 | -3.25 | 5.53E-08 |
| <i>Nfkb1</i>   | -1.41 | 1.44E-08 | -1.53 | 2.10E-08 | -1.44 | 5.25E-09 |
| <i>Nfkb2</i>   | -2.03 | 4.53E-08 | -2.32 | 4.71E-08 | -2.67 | 3.42E-09 |
| <i>Nfkbia</i>  | -1.84 | 3.98E-08 | -2.05 | 4.72E-08 | -1.95 | 1.32E-08 |
| <i>Nfkbib</i>  | -1.56 | 3.14E-07 | -1.79 | 2.88E-07 | -2.09 | 2.04E-08 |
| <i>Nfkbid</i>  | -2.55 | 2.21E-07 | -3.38 | 7.75E-08 | -3.07 | 3.32E-08 |
| <i>Nfkbie</i>  | -1.55 | 1.65E-08 | -2.00 | 8.76E-09 | -1.47 | 1.05E-08 |
| <i>Nfyc</i>    | -1.19 | 4.70E-09 | -1.18 | 1.01E-08 | -1.22 | 1.22E-09 |
| <i>Ngfrap1</i> | -1.01 | 1.37E-07 | -1.18 | 1.13E-07 | -1.40 | 7.20E-09 |
| <i>Nhs1l</i>   | -1.52 | 1.12E-05 | -1.91 | 4.55E-06 | -1.51 | 9.78E-06 |
| <i>Nicn1</i>   | 1.50  | 3.06E-05 | 1.92  | 1.02E-05 | 1.21  | 1.56E-04 |
| <i>Nif3l1</i>  | -0.89 | 3.15E-06 | -1.11 | 1.36E-06 | -1.20 | 1.92E-07 |
| <i>Nim1k</i>   | 1.40  | 5.29E-04 | 1.07  | 7.21E-03 | 1.25  | 1.09E-03 |
| <i>Ninj1</i>   | -2.08 | 2.25E-07 | -2.63 | 1.06E-07 | -2.93 | 1.03E-08 |
| <i>Nipa1</i>   | 4.68  | 2.44E-08 | 4.25  | 1.14E-07 | 3.03  | 3.99E-07 |
| <i>Nipa2</i>   | -1.19 | 4.07E-08 | -1.36 | 4.32E-08 | -1.22 | 1.75E-08 |
| <i>Nkrf</i>    | -1.26 | 1.66E-06 | -1.46 | 1.32E-06 | -1.91 | 3.78E-08 |
| <i>Nlrc4</i>   | -1.20 | 9.20E-04 | -1.00 | 6.87E-03 | -1.03 | 2.32E-03 |
| <i>Nmrk1</i>   | -1.14 | 1.49E-05 | -1.13 | 4.25E-05 | -1.28 | 4.39E-06 |
| <i>Nol10</i>   | -1.83 | 2.99E-08 | -2.02 | 4.11E-08 | -2.40 | 2.23E-09 |
| <i>Nol11</i>   | -1.18 | 3.11E-07 | -1.19 | 8.01E-07 | -1.47 | 3.52E-08 |
| <i>Nop58</i>   | -1.11 | 4.70E-07 | -1.11 | 1.27E-06 | -1.82 | 6.74E-09 |
| <i>Notch4</i>  | 2.03  | 5.35E-07 | 1.97  | 1.83E-06 | 2.63  | 4.32E-08 |
| <i>Noxred1</i> | 1.58  | 8.17E-03 | 1.66  | 1.18E-02 | 1.64  | 6.08E-03 |
| <i>Npat</i>    | -1.17 | 5.48E-08 | -1.15 | 1.53E-07 | -1.11 | 4.38E-08 |
| <i>Npb</i>     | 1.44  | 9.31E-03 | 1.28  | 3.26E-02 | 1.48  | 7.24E-03 |
| <i>Nptn</i>    | -0.99 | 1.04E-06 | -1.03 | 2.14E-06 | -1.01 | 6.68E-07 |
| <i>Nptx1</i>   | -2.66 | 1.70E-03 | -4.13 | 1.48E-04 | -5.07 | 8.32E-06 |
| <i>Nr1d2</i>   | -1.84 | 2.14E-07 | -2.15 | 1.76E-07 | -2.05 | 5.90E-08 |
| <i>Nr4a1</i>   | -3.12 | 1.95E-04 | -4.79 | 1.46E-05 | -5.83 | 7.75E-07 |
| <i>Nr4a2</i>   | -3.48 | 1.52E-02 | -6.12 | 8.07E-04 | -8.56 | 1.82E-05 |
| <i>Nr4a3</i>   | -3.35 | 9.27E-04 | -5.44 | 5.11E-05 | -6.88 | 2.04E-06 |
| <i>Nradd</i>   | 1.35  | 2.38E-04 | 1.52  | 2.29E-04 | 1.53  | 7.45E-05 |
| <i>Nrip1</i>   | -1.70 | 1.27E-06 | -1.93 | 1.24E-06 | -1.48 | 3.26E-06 |
| <i>Nt5dc3</i>  | -1.22 | 7.70E-07 | -1.42 | 6.09E-07 | -1.80 | 2.29E-08 |
| <i>Nthl1</i>   | 1.86  | 6.66E-05 | 1.51  | 8.54E-04 | 2.30  | 9.10E-06 |
| <i>Ntn4</i>    | 4.63  | 9.35E-06 | 3.94  | 9.56E-05 | 1.77  | 1.14E-02 |

|                    |       |          |       |          |       |          |
|--------------------|-------|----------|-------|----------|-------|----------|
| <i>Ntrk3</i>       | -1.50 | 1.12E-05 | -1.79 | 6.82E-06 | -1.66 | 3.91E-06 |
| <i>Nuak1</i>       | -2.04 | 4.90E-03 | -2.80 | 1.21E-03 | -2.24 | 2.38E-03 |
| <i>Nucb2</i>       | -0.86 | 4.46E-04 | -1.37 | 2.81E-05 | -1.20 | 2.55E-05 |
| <i>Nudcd1</i>      | 1.29  | 2.91E-07 | 1.25  | 1.01E-06 | 1.31  | 1.81E-07 |
| <i>Nudt15</i>      | -1.43 | 8.24E-08 | -1.82 | 4.39E-08 | -1.44 | 4.69E-08 |
| <i>Nudt18</i>      | 1.43  | 7.31E-08 | 1.26  | 5.07E-07 | 1.67  | 1.29E-08 |
| <i>Nudt2</i>       | 1.55  | 1.02E-04 | 1.81  | 7.56E-05 | 1.18  | 7.66E-04 |
| <i>Nudt22</i>      | 1.56  | 3.02E-06 | 1.42  | 1.77E-05 | 1.45  | 4.57E-06 |
| <i>Nudt4</i>       | -0.85 | 2.04E-06 | -1.06 | 9.30E-07 | -1.42 | 2.25E-08 |
| <i>Nudt5</i>       | 1.32  | 4.58E-08 | 1.40  | 7.81E-08 | 1.32  | 2.55E-08 |
| <i>Nudt7</i>       | 1.72  | 5.79E-06 | 1.87  | 7.84E-06 | 1.99  | 1.27E-06 |
| <i>Nufip1</i>      | -0.94 | 1.10E-06 | -1.13 | 6.64E-07 | -1.05 | 3.37E-07 |
| <i>Nup210l</i>     | 1.66  | 4.33E-07 | 1.86  | 4.90E-07 | 2.26  | 2.46E-08 |
| <i>Nup37</i>       | 1.07  | 1.84E-05 | 1.22  | 1.62E-05 | 1.14  | 9.04E-06 |
| <i>Nup62cl</i>     | -1.57 | 4.50E-02 | -1.82 | 3.80E-02 | -1.95 | 1.43E-02 |
| <i>Nup98</i>       | -1.62 | 3.66E-08 | -1.82 | 4.38E-08 | -2.04 | 3.57E-09 |
| <i>Nxnl1</i>       | 3.16  | 8.78E-06 | 4.41  | 1.47E-06 | 3.47  | 3.12E-06 |
| <i>Nxpe3</i>       | 1.87  | 7.11E-10 | 1.90  | 1.11E-09 | 2.10  | 5.19E-11 |
| <i>Nyap1</i>       | 1.99  | 1.26E-06 | 1.69  | 1.34E-05 | 1.96  | 1.09E-06 |
| <i>Oas1b</i>       | 1.46  | 3.16E-08 | 1.73  | 2.70E-08 | 3.02  | 1.34E-10 |
| <i>Oas1c</i>       | 1.09  | 8.19E-08 | 0.87  | 1.19E-06 | 1.58  | 3.07E-09 |
| <i>Oat</i>         | -1.41 | 5.55E-05 | -1.54 | 7.06E-05 | -1.51 | 2.64E-05 |
| <i>Ocell</i>       | 1.34  | 1.56E-08 | 1.39  | 2.98E-08 | 1.60  | 2.02E-09 |
| <i>Ociad2</i>      | 1.30  | 1.23E-02 | 2.26  | 6.58E-04 | 1.54  | 4.07E-03 |
| <i>Odc1</i>        | -3.11 | 2.59E-06 | -4.17 | 6.43E-07 | -5.84 | 1.13E-08 |
| <i>Ogg1</i>        | 0.96  | 6.71E-06 | 1.08  | 6.82E-06 | 1.05  | 2.48E-06 |
| <i>Olfr755-ps1</i> | 1.19  | 4.68E-03 | 1.58  | 1.47E-03 | 2.41  | 1.74E-05 |
| <i>Olfr99</i>      | 1.42  | 1.17E-04 | 1.84  | 3.49E-05 | 2.37  | 1.18E-06 |
| <i>Omal</i>        | 1.43  | 5.78E-08 | 1.60  | 7.19E-08 | 1.62  | 1.32E-08 |
| <i>Optn</i>        | -1.63 | 2.51E-05 | -1.55 | 1.01E-04 | -2.44 | 6.11E-07 |
| <i>Orai1</i>       | -1.11 | 1.01E-07 | -1.50 | 3.44E-08 | -1.71 | 2.48E-09 |
| <i>Orai3</i>       | 1.40  | 3.08E-06 | 1.71  | 1.57E-06 | 1.82  | 2.49E-07 |
| <i>Orc1</i>        | -2.74 | 3.40E-05 | -3.40 | 1.53E-05 | -3.06 | 1.11E-05 |
| <i>Orc6</i>        | -1.17 | 1.23E-06 | -1.28 | 1.69E-06 | -1.34 | 3.06E-07 |
| <i>Orm1</i>        | 0.72  | 2.41E-02 | 1.13  | 3.48E-03 | 1.07  | 2.07E-03 |
| <i>Oser1</i>       | -1.35 | 2.40E-07 | -1.46 | 3.51E-07 | -1.39 | 1.31E-07 |
| <i>Otub2</i>       | -1.40 | 1.49E-04 | -1.71 | 7.24E-05 | -1.59 | 4.37E-05 |
| <i>Otulin</i>      | -1.26 | 2.89E-08 | -1.44 | 2.97E-08 | -1.29 | 1.16E-08 |

|                 |       |          |       |          |       |          |
|-----------------|-------|----------|-------|----------|-------|----------|
| <i>Ovgp1</i>    | 1.38  | 4.07E-08 | 1.33  | 1.31E-07 | 1.68  | 5.08E-09 |
| <i>Oxld1</i>    | 1.56  | 2.47E-05 | 1.19  | 5.34E-04 | 1.75  | 7.39E-06 |
| <i>Oxnad1</i>   | 1.50  | 6.12E-08 | 1.40  | 2.54E-07 | 1.44  | 4.97E-08 |
| <i>P2rx7</i>    | -1.25 | 9.25E-04 | -1.21 | 2.68E-03 | -1.77 | 5.05E-05 |
| <i>P2ry10</i>   | -1.72 | 6.18E-07 | -1.93 | 6.92E-07 | -2.43 | 2.63E-08 |
| <i>P2ry14</i>   | -3.10 | 1.64E-03 | -5.28 | 6.56E-05 | -6.00 | 6.89E-06 |
| <i>P2ry2</i>    | -2.52 | 3.67E-05 | -3.91 | 2.52E-06 | -5.23 | 5.85E-08 |
| <i>Pabpc11</i>  | -1.29 | 1.93E-04 | -1.38 | 2.87E-04 | -1.44 | 6.92E-05 |
| <i>Pacsin3</i>  | -1.77 | 2.75E-05 | -1.96 | 3.19E-05 | -2.04 | 6.72E-06 |
| <i>Padi2</i>    | -1.85 | 2.90E-06 | -2.10 | 2.86E-06 | -1.53 | 1.23E-05 |
| <i>Pafah1b3</i> | 1.14  | 3.26E-04 | 0.88  | 4.65E-03 | 1.63  | 1.38E-05 |
| <i>Pagl</i>     | -1.25 | 7.44E-09 | -1.26 | 1.69E-08 | -1.36 | 1.57E-09 |
| <i>Pagr1a</i>   | 1.37  | 4.60E-08 | 1.46  | 7.73E-08 | 1.87  | 2.68E-09 |
| <i>Paip2b</i>   | -1.35 | 2.05E-07 | -1.48 | 2.68E-07 | -1.51 | 5.40E-08 |
| <i>Pak1</i>     | -1.21 | 7.07E-06 | -1.31 | 9.61E-06 | -1.29 | 3.21E-06 |
| <i>Pank1</i>    | 1.06  | 3.69E-04 | 1.09  | 6.86E-04 | 1.31  | 5.81E-05 |
| <i>Pank2</i>    | 1.08  | 1.67E-09 | 1.11  | 3.54E-09 | 1.31  | 1.18E-10 |
| <i>Papln</i>    | -1.51 | 1.88E-02 | -1.39 | 4.91E-02 | -2.09 | 2.42E-03 |
| <i>Paqr3</i>    | -1.99 | 1.12E-04 | -2.28 | 9.38E-05 | -2.28 | 3.01E-05 |
| <i>Paqr7</i>    | 1.78  | 2.35E-09 | 1.71  | 6.70E-09 | 2.34  | 1.18E-10 |
| <i>Parp11</i>   | 0.89  | 3.24E-05 | 1.22  | 5.98E-06 | 2.49  | 5.28E-09 |
| <i>Parp16</i>   | 2.35  | 1.33E-08 | 2.10  | 6.63E-08 | 2.71  | 2.17E-09 |
| <i>Pbx2</i>     | 1.36  | 2.56E-08 | 1.53  | 2.97E-08 | 1.76  | 2.04E-09 |
| <i>Pbx4</i>     | 1.65  | 4.47E-05 | 0.99  | 5.00E-03 | 1.24  | 3.98E-04 |
| <i>Pck2</i>     | 1.25  | 3.74E-08 | 1.30  | 7.36E-08 | 1.78  | 1.59E-09 |
| <i>Pcmtd2</i>   | 0.84  | 8.02E-07 | 1.05  | 3.59E-07 | 1.31  | 1.56E-08 |
| <i>Pcna</i>     | -1.41 | 3.12E-07 | -1.59 | 3.17E-07 | -1.87 | 2.14E-08 |
| <i>Pcnxl2</i>   | 3.80  | 4.64E-06 | 3.03  | 8.21E-05 | 4.06  | 2.06E-06 |
| <i>Pcolce</i>   | 2.32  | 4.43E-08 | 2.35  | 1.02E-07 | 3.07  | 3.16E-09 |
| <i>Pcsk1</i>    | 1.12  | 4.06E-03 | 1.24  | 4.45E-03 | 2.10  | 2.88E-05 |
| <i>Pcyox1</i>   | 1.24  | 6.65E-08 | 1.06  | 5.78E-07 | 1.07  | 1.29E-07 |
| <i>Pcyt1a</i>   | -0.98 | 1.14E-05 | -1.13 | 9.69E-06 | -1.21 | 1.59E-06 |
| <i>Pdcd1</i>    | -1.33 | 2.29E-03 | -1.82 | 5.44E-04 | -1.93 | 1.19E-04 |
| <i>Pdcd1lg2</i> | -3.00 | 5.03E-05 | -3.41 | 4.52E-05 | -3.38 | 1.53E-05 |
| <i>Pddc1</i>    | 1.17  | 5.41E-08 | 1.14  | 1.66E-07 | 1.50  | 4.92E-09 |
| <i>Pde2a</i>    | 1.48  | 4.70E-09 | 1.24  | 2.90E-08 | 2.05  | 2.03E-10 |
| <i>Pde4b</i>    | -1.56 | 6.81E-08 | -1.84 | 5.77E-08 | -1.21 | 3.46E-07 |
| <i>Pde4d</i>    | -1.83 | 1.13E-07 | -2.07 | 1.20E-07 | -2.29 | 1.22E-08 |



|                |       |          |       |          |       |          |
|----------------|-------|----------|-------|----------|-------|----------|
| <i>Pde5a</i>   | 2.45  | 4.92E-07 | 2.81  | 4.48E-07 | 2.23  | 7.82E-07 |
| <i>Pde6b</i>   | 2.52  | 2.95E-04 | 2.04  | 3.18E-03 | 3.07  | 5.11E-05 |
| <i>Pde6d</i>   | 1.44  | 1.06E-08 | 1.61  | 1.33E-08 | 1.71  | 1.38E-09 |
| <i>Pde6g</i>   | 1.83  | 1.68E-02 | 2.41  | 6.58E-03 | 3.02  | 5.62E-04 |
| <i>Pdhx</i>    | -1.12 | 1.01E-06 | -1.15 | 2.33E-06 | -1.23 | 3.40E-07 |
| <i>Pdk2</i>    | 1.14  | 1.80E-07 | 1.11  | 5.72E-07 | 1.54  | 1.10E-08 |
| <i>Pdssl</i>   | -1.07 | 1.20E-06 | -1.08 | 2.96E-06 | -1.70 | 1.89E-08 |
| <i>Pdxk</i>    | -0.79 | 1.44E-06 | -1.01 | 5.25E-07 | -1.05 | 9.33E-08 |
| <i>Penk</i>    | -1.91 | 6.63E-03 | -3.16 | 4.40E-04 | -1.99 | 4.73E-03 |
| <i>Per1</i>    | -2.40 | 1.10E-07 | -3.11 | 4.71E-08 | -3.24 | 7.00E-09 |
| <i>Per2</i>    | -3.17 | 2.60E-05 | -4.27 | 5.71E-06 | -5.23 | 2.76E-07 |
| <i>Pex6</i>    | 1.78  | 1.27E-08 | 1.95  | 1.74E-08 | 2.19  | 1.31E-09 |
| <i>Pfkip</i>   | -1.38 | 1.94E-07 | -1.61 | 1.64E-07 | -1.46 | 8.11E-08 |
| <i>Pgpep1</i>  | 1.92  | 2.67E-06 | 1.37  | 1.16E-04 | 1.67  | 6.98E-06 |
| <i>Phactr2</i> | -1.12 | 1.78E-07 | -0.83 | 5.04E-06 | -1.45 | 1.50E-08 |
| <i>Phactr4</i> | 1.07  | 1.55E-07 | 0.86  | 2.24E-06 | 1.19  | 4.09E-08 |
| <i>Phf11d</i>  | 0.52  | 3.30E-02 | 1.17  | 4.25E-04 | 1.80  | 3.70E-06 |
| <i>Phf23</i>   | 1.62  | 1.11E-08 | 1.87  | 1.12E-08 | 1.76  | 2.59E-09 |
| <i>Phf5a</i>   | -1.13 | 1.56E-08 | -1.09 | 4.71E-08 | -1.19 | 4.73E-09 |
| <i>Phf6</i>    | -1.80 | 2.27E-08 | -2.09 | 2.20E-08 | -2.16 | 2.98E-09 |
| <i>Phlda1</i>  | -1.98 | 2.64E-06 | -2.34 | 1.85E-06 | -3.58 | 1.54E-08 |
| <i>Phlda3</i>  | 2.53  | 8.83E-05 | 1.30  | 2.01E-02 | 1.84  | 9.56E-04 |
| <i>Phldb1</i>  | 1.78  | 2.38E-06 | 1.88  | 4.13E-06 | 1.59  | 5.09E-06 |
| <i>Phyhd1</i>  | 2.26  | 1.27E-03 | 1.69  | 1.68E-02 | 2.65  | 3.45E-04 |
| <i>Pi4k2a</i>  | -1.12 | 1.38E-07 | -1.24 | 1.64E-07 | -1.19 | 5.20E-08 |
| <i>Pi4k2b</i>  | -1.21 | 1.55E-06 | -1.31 | 2.22E-06 | -1.43 | 2.74E-07 |
| <i>Pigh</i>    | 1.09  | 2.53E-06 | 1.14  | 4.87E-06 | 1.11  | 1.71E-06 |
| <i>Pigv</i>    | 1.07  | 1.10E-06 | 1.25  | 8.52E-07 | 1.70  | 1.84E-08 |
| <i>Pigx</i>    | 1.00  | 2.18E-08 | 1.08  | 3.29E-08 | 1.04  | 7.83E-09 |
| <i>Pik3ap1</i> | -1.18 | 4.51E-03 | -1.85 | 4.15E-04 | -1.78 | 1.95E-04 |
| <i>Pik3r1</i>  | -1.08 | 4.26E-08 | -1.30 | 3.34E-08 | -1.02 | 3.63E-08 |
| <i>Pik3r5</i>  | 1.43  | 3.33E-08 | 1.40  | 9.58E-08 | 1.27  | 4.32E-08 |
| <i>Pja2</i>    | 0.98  | 2.69E-08 | 1.02  | 5.11E-08 | 1.16  | 3.87E-09 |
| <i>Pla2g4c</i> | 1.47  | 2.31E-03 | 2.10  | 3.91E-04 | 1.48  | 1.97E-03 |
| <i>Plagl1</i>  | -3.29 | 1.79E-03 | -3.88 | 1.23E-03 | -5.68 | 2.03E-05 |
| <i>Plau</i>    | -1.29 | 2.17E-02 | 1.23  | 4.54E-02 | -1.22 | 2.60E-02 |
| <i>Plaur</i>   | -2.88 | 1.06E-04 | -4.17 | 1.30E-05 | -4.21 | 3.51E-06 |
| <i>Plcb3</i>   | 1.57  | 2.71E-06 | 1.69  | 4.08E-06 | 1.31  | 1.08E-05 |

|                  |       |          |       |          |       |          |
|------------------|-------|----------|-------|----------|-------|----------|
| <i>Plcxd2</i>    | -1.91 | 3.84E-08 | -2.24 | 3.49E-08 | -2.62 | 2.09E-09 |
| <i>Plekhg5</i>   | 1.17  | 1.11E-04 | 0.92  | 1.68E-03 | 1.03  | 2.67E-04 |
| <i>Plekhh1</i>   | 1.24  | 6.20E-03 | 1.20  | 1.44E-02 | 1.21  | 6.44E-03 |
| <i>Plin3</i>     | 1.05  | 5.19E-07 | 1.31  | 2.48E-07 | 1.26  | 7.68E-08 |
| <i>Plk2</i>      | -2.38 | 2.54E-04 | -3.13 | 7.22E-05 | -4.38 | 1.22E-06 |
| <i>Plk3</i>      | -1.60 | 4.47E-06 | -1.99 | 1.92E-06 | -2.09 | 3.41E-07 |
| <i>Plk4</i>      | -1.58 | 1.82E-05 | -1.90 | 1.01E-05 | -1.87 | 3.45E-06 |
| <i>Pllp</i>      | 1.86  | 4.61E-04 | 1.07  | 3.19E-02 | 2.59  | 2.66E-05 |
| <i>Plod3</i>     | 1.61  | 1.83E-08 | 1.58  | 4.97E-08 | 1.77  | 4.31E-09 |
| <i>Plp1</i>      | 1.15  | 1.38E-06 | 1.38  | 8.98E-07 | 1.31  | 3.42E-07 |
| <i>Plscr4</i>    | 1.51  | 1.84E-02 | 2.82  | 6.78E-04 | 1.98  | 3.35E-03 |
| <i>Plxna1</i>    | -0.77 | 1.16E-05 | -1.02 | 3.16E-06 | -1.68 | 1.39E-08 |
| <i>Pmaip1</i>    | -1.98 | 9.20E-04 | -2.47 | 4.15E-04 | -2.13 | 4.87E-04 |
| <i>Pmepa1</i>    | -1.33 | 3.07E-08 | -1.46 | 4.33E-08 | -1.89 | 1.34E-09 |
| <i>Pno1</i>      | -1.74 | 8.02E-06 | -1.72 | 2.32E-05 | -2.24 | 7.02E-07 |
| <i>Pnpla8</i>    | -1.50 | 6.74E-07 | -1.73 | 5.88E-07 | -1.67 | 1.95E-07 |
| <i>Pnrcl</i>     | -1.27 | 3.13E-07 | -1.53 | 2.00E-07 | -1.20 | 3.39E-07 |
| <i>Poc1a</i>     | -1.06 | 1.17E-02 | -1.22 | 9.87E-03 | -1.51 | 1.03E-03 |
| <i>Poldip3</i>   | -0.95 | 6.22E-08 | -1.03 | 9.19E-08 | -1.01 | 2.17E-08 |
| <i>Polg</i>      | -1.02 | 3.98E-08 | -1.15 | 4.55E-08 | -1.01 | 2.28E-08 |
| <i>Polg2</i>     | -1.46 | 1.38E-07 | -1.87 | 6.54E-08 | -1.85 | 1.36E-08 |
| <i>Polk</i>      | 1.03  | 1.62E-05 | 1.21  | 1.19E-05 | 1.06  | 1.08E-05 |
| <i>Poll</i>      | 1.01  | 3.14E-05 | 1.15  | 2.71E-05 | 1.16  | 7.84E-06 |
| <i>Polr2d</i>    | -1.17 | 1.98E-06 | -1.38 | 1.48E-06 | -1.58 | 1.18E-07 |
| <i>Pom121</i>    | -1.00 | 7.88E-08 | -1.11 | 9.44E-08 | -1.27 | 7.30E-09 |
| <i>Pomk</i>      | 1.08  | 1.24E-06 | 1.19  | 1.52E-06 | 1.27  | 2.40E-07 |
| <i>Pop4</i>      | -1.12 | 4.93E-06 | -1.11 | 1.52E-05 | -1.19 | 2.47E-06 |
| <i>Pou2f2</i>    | 1.05  | 2.71E-05 | 1.09  | 5.13E-05 | 1.09  | 1.69E-05 |
| <i>Ppfial</i>    | -0.91 | 1.64E-08 | -1.04 | 1.74E-08 | -1.14 | 1.46E-09 |
| <i>Ppil4</i>     | -1.15 | 1.09E-07 | -1.18 | 2.29E-07 | -1.16 | 5.88E-08 |
| <i>Ppm1e</i>     | 1.25  | 1.31E-04 | 1.17  | 5.45E-04 | 1.09  | 3.41E-04 |
| <i>Ppm1m</i>     | 1.75  | 6.18E-08 | 1.68  | 2.11E-07 | 1.44  | 1.72E-07 |
| <i>Ppp1r13l</i>  | 2.39  | 2.49E-06 | 2.55  | 4.12E-06 | 1.43  | 1.68E-04 |
| <i>Ppp1r15a</i>  | -1.83 | 3.72E-07 | -2.34 | 1.48E-07 | -2.33 | 3.51E-08 |
| <i>Ppp1r16b</i>  | -1.91 | 6.18E-08 | -2.13 | 7.55E-08 | -1.05 | 5.67E-06 |
| <i>Ppp1r18os</i> | 1.24  | 3.26E-02 | 1.66  | 1.26E-02 | 1.72  | 4.75E-03 |
| <i>Ppp1r3e</i>   | 1.64  | 2.55E-08 | 1.59  | 7.76E-08 | 1.30  | 7.85E-08 |
| <i>Ppp1r3f</i>   | 1.75  | 7.94E-09 | 1.73  | 2.01E-08 | 1.46  | 1.07E-08 |

|                  |       |          |       |          |       |          |
|------------------|-------|----------|-------|----------|-------|----------|
| <i>Ppp1r3fos</i> | 1.91  | 1.73E-04 | 2.39  | 7.08E-05 | 1.05  | 1.07E-02 |
| <i>Ppp1r9b</i>   | 1.06  | 5.86E-08 | 0.99  | 2.43E-07 | 1.02  | 4.40E-08 |
| <i>Ppp2ca</i>    | -1.45 | 1.12E-06 | -1.79 | 5.77E-07 | -1.94 | 7.25E-08 |
| <i>Ppp2r1b</i>   | -1.00 | 7.56E-08 | -1.16 | 7.33E-08 | -1.28 | 7.20E-09 |
| <i>Ppp2r2a</i>   | -1.04 | 2.36E-07 | -1.07 | 4.95E-07 | -1.05 | 1.41E-07 |
| <i>Ppp2r2d</i>   | -1.25 | 6.06E-07 | -1.36 | 8.54E-07 | -1.44 | 1.32E-07 |
| <i>Ppp2r3a</i>   | 1.21  | 1.54E-05 | 1.55  | 5.16E-06 | 1.30  | 6.46E-06 |
| <i>Ppp3r1</i>    | -1.22 | 9.07E-07 | -1.50 | 4.93E-07 | -1.32 | 3.41E-07 |
| <i>Pptc7</i>     | -0.94 | 1.17E-08 | -1.04 | 1.56E-08 | -1.02 | 2.83E-09 |
| <i>Prdm1</i>     | 0.97  | 9.07E-07 | 1.28  | 2.74E-07 | 1.27  | 6.87E-08 |
| <i>Prdm8</i>     | -1.92 | 1.88E-03 | -2.38 | 9.23E-04 | -1.53 | 7.69E-03 |
| <i>Prdx6</i>     | -1.42 | 6.13E-09 | -1.58 | 8.67E-09 | -1.83 | 4.66E-10 |
| <i>Prep</i>      | -0.99 | 4.00E-08 | -1.02 | 8.10E-08 | -1.38 | 2.03E-09 |
| <i>Prkab2</i>    | -0.94 | 4.99E-06 | -1.06 | 4.80E-06 | -1.87 | 1.25E-08 |
| <i>Prkar1b</i>   | 2.63  | 4.17E-06 | 2.89  | 5.17E-06 | 2.00  | 3.55E-05 |
| <i>Prkd2</i>     | 1.08  | 6.89E-09 | 1.06  | 1.74E-08 | 1.75  | 1.18E-10 |
| <i>Prkx</i>      | -0.95 | 4.07E-07 | -1.07 | 4.21E-07 | -1.11 | 7.70E-08 |
| <i>Prlr</i>      | -1.77 | 6.88E-03 | -2.01 | 6.39E-03 | -1.85 | 4.71E-03 |
| <i>Prmt2</i>     | 2.01  | 2.49E-08 | 1.70  | 1.86E-07 | 1.85  | 2.23E-08 |
| <i>Pros1</i>     | 1.73  | 1.24E-03 | 2.15  | 5.77E-04 | 1.06  | 2.39E-02 |
| <i>Proser3</i>   | 2.13  | 2.03E-08 | 2.16  | 4.51E-08 | 2.93  | 1.04E-09 |
| <i>Prox2</i>     | 0.99  | 6.81E-04 | 1.43  | 9.50E-05 | 1.01  | 5.46E-04 |
| <i>Prpf38a</i>   | -1.14 | 5.02E-08 | -1.23 | 7.74E-08 | -1.24 | 1.46E-08 |
| <i>Prpf40b</i>   | 1.08  | 1.51E-07 | 1.05  | 4.83E-07 | 1.11  | 7.45E-08 |
| <i>Prps1l3</i>   | -1.20 | 6.09E-04 | -0.92 | 8.15E-03 | -1.38 | 1.77E-04 |
| <i>Prr11</i>     | -2.06 | 2.42E-03 | -1.77 | 1.26E-02 | -1.90 | 3.80E-03 |
| <i>Prr12</i>     | 0.96  | 1.32E-06 | 1.04  | 1.89E-06 | 1.02  | 6.16E-07 |
| <i>Prrg2</i>     | 0.83  | 2.16E-03 | 1.06  | 8.62E-04 | 1.29  | 6.56E-05 |
| <i>Prrt2</i>     | 2.50  | 1.10E-06 | 2.28  | 6.63E-06 | 2.53  | 7.43E-07 |
| <i>Prss36</i>    | 0.96  | 3.91E-02 | 1.33  | 1.33E-02 | 1.35  | 5.74E-03 |
| <i>Psd</i>       | -2.00 | 4.64E-06 | -1.93 | 1.71E-05 | -2.53 | 4.91E-07 |
| <i>Psen1</i>     | -0.94 | 2.28E-07 | -1.01 | 3.34E-07 | -1.17 | 2.45E-08 |
| <i>Psemb8</i>    | 0.94  | 2.33E-08 | 1.10  | 2.13E-08 | 1.74  | 2.02E-10 |
| <i>Psemb9</i>    | 0.87  | 1.27E-06 | 1.14  | 4.14E-07 | 2.78  | 2.03E-10 |
| <i>Psmid9</i>    | -1.14 | 6.27E-06 | -1.20 | 1.07E-05 | -1.13 | 5.19E-06 |
| <i>Pspc1</i>     | -1.48 | 1.38E-07 | -1.72 | 1.23E-07 | -1.85 | 1.53E-08 |
| <i>Pstk</i>      | 2.16  | 5.36E-05 | 2.24  | 1.01E-04 | 2.10  | 5.67E-05 |
| <i>Pstpip2</i>   | -2.02 | 1.75E-04 | -2.22 | 2.04E-04 | -1.66 | 7.15E-04 |

|                  |       |          |       |          |       |          |
|------------------|-------|----------|-------|----------|-------|----------|
| <i>Ptbp1</i>     | -1.25 | 8.67E-09 | -1.42 | 1.01E-08 | -1.47 | 1.20E-09 |
| <i>Ptbp2</i>     | -1.06 | 2.82E-07 | -1.15 | 3.87E-07 | -1.14 | 1.01E-07 |
| <i>Ptdss2</i>    | 1.33  | 5.45E-07 | 1.38  | 1.11E-06 | 1.45  | 1.85E-07 |
| <i>Ptp4a1</i>    | -2.97 | 2.56E-07 | -3.63 | 1.53E-07 | -3.20 | 9.56E-08 |
| <i>Ptpn22</i>    | -1.20 | 2.12E-08 | -1.40 | 2.07E-08 | -1.42 | 2.99E-09 |
| <i>Ptpru</i>     | -1.72 | 2.32E-02 | -2.12 | 1.38E-02 | -2.23 | 4.70E-03 |
| <i>Ptrf</i>      | -2.50 | 4.12E-04 | -1.59 | 1.78E-02 | -2.11 | 1.33E-03 |
| <i>Pts</i>       | 1.12  | 4.65E-07 | 0.90  | 7.88E-06 | 1.59  | 1.90E-08 |
| <i>Pura</i>      | 0.90  | 7.63E-07 | 1.06  | 5.48E-07 | 1.18  | 5.65E-08 |
| <i>Pvrl1</i>     | -1.64 | 1.67E-02 | -2.34 | 3.98E-03 | -2.43 | 1.28E-03 |
| <i>Pwwp2b</i>    | -1.84 | 6.19E-05 | -2.19 | 3.94E-05 | -2.65 | 2.30E-06 |
| <i>Pxmp4</i>     | 1.34  | 6.70E-09 | 1.55  | 7.67E-09 | 1.37  | 2.24E-09 |
| <i>Pygl</i>      | -1.90 | 1.98E-04 | -3.19 | 7.24E-06 | -2.39 | 2.59E-05 |
| <i>Pyhin1</i>    | 0.87  | 1.27E-07 | 1.03  | 9.85E-08 | 1.64  | 8.28E-10 |
| <i>Qk</i>        | -1.14 | 3.72E-07 | -1.23 | 5.26E-07 | -1.20 | 1.62E-07 |
| <i>Qprt</i>      | 1.47  | 4.02E-09 | 1.47  | 8.67E-09 | 2.09  | 1.43E-10 |
| <i>Qrich2</i>    | 0.98  | 4.10E-03 | 1.46  | 5.49E-04 | 1.52  | 1.44E-04 |
| <i>R74862</i>    | 1.28  | 1.51E-04 | 1.56  | 7.53E-05 | 1.83  | 6.04E-06 |
| <i>Rab11fip5</i> | -1.55 | 2.42E-05 | -1.60 | 4.89E-05 | -1.77 | 6.45E-06 |
| <i>Rab5a</i>     | -1.03 | 3.74E-06 | -0.99 | 1.43E-05 | -1.05 | 2.62E-06 |
| <i>Rab5b</i>     | 0.91  | 6.72E-07 | 1.21  | 1.88E-07 | 1.20  | 4.55E-08 |
| <i>Rab6b</i>     | 1.91  | 7.85E-09 | 1.98  | 1.49E-08 | 2.12  | 1.43E-09 |
| <i>Rabgap1l</i>  | 1.71  | 1.67E-09 | 1.81  | 2.88E-09 | 1.10  | 7.34E-09 |
| <i>Racgap1</i>   | 1.54  | 8.60E-08 | 1.04  | 5.26E-06 | 1.18  | 4.94E-07 |
| <i>Rad54b</i>    | -1.76 | 2.64E-03 | -1.34 | 2.56E-02 | -1.56 | 5.37E-03 |
| <i>Ramp3</i>     | -3.40 | 8.51E-04 | -5.36 | 5.92E-05 | -6.28 | 4.77E-06 |
| <i>Ranbp2</i>    | -1.18 | 3.46E-07 | -1.24 | 6.36E-07 | -1.22 | 1.88E-07 |
| <i>Rap1b</i>     | -1.16 | 6.59E-07 | -1.27 | 8.56E-07 | -1.12 | 6.21E-07 |
| <i>Rap1gap2</i>  | -3.21 | 1.87E-02 | -3.98 | 1.07E-02 | -4.69 | 1.64E-03 |
| <i>Raph1</i>     | -1.68 | 8.55E-08 | -1.81 | 1.27E-07 | -1.49 | 1.40E-07 |
| <i>Rarg</i>      | 1.53  | 8.81E-08 | 1.76  | 8.23E-08 | 1.45  | 7.80E-08 |
| <i>Rasall</i>    | -1.95 | 1.41E-06 | -2.38 | 7.60E-07 | -2.93 | 3.54E-08 |
| <i>Rasgef1b</i>  | -2.25 | 1.16E-05 | -2.88 | 3.98E-06 | -3.22 | 4.12E-07 |
| <i>Rasgrp4</i>   | -2.93 | 8.38E-03 | -3.89 | 2.85E-03 | -4.59 | 3.30E-04 |
| <i>Rassf3</i>    | -1.36 | 1.74E-07 | -1.65 | 1.13E-07 | -1.54 | 4.21E-08 |
| <i>Rassf8</i>    | -2.08 | 5.92E-05 | -2.44 | 4.23E-05 | -1.84 | 1.41E-04 |
| <i>Rbbp8</i>     | -1.86 | 1.32E-07 | -2.21 | 9.65E-08 | -2.47 | 9.15E-09 |
| <i>Rbbp9</i>     | 1.47  | 1.50E-07 | 1.25  | 1.47E-06 | 1.89  | 1.37E-08 |

|               |       |          |       |          |       |          |
|---------------|-------|----------|-------|----------|-------|----------|
| <i>Rbm12</i>  | -2.12 | 5.14E-04 | -2.35 | 5.63E-04 | -2.32 | 2.25E-04 |
| <i>Rbm14</i>  | -1.37 | 1.96E-05 | -1.51 | 2.42E-05 | -1.17 | 6.57E-05 |
| <i>Rbm18</i>  | -1.04 | 2.97E-08 | -1.12 | 4.62E-08 | -1.07 | 1.22E-08 |
| <i>Rbm20</i>  | 1.12  | 3.01E-02 | 1.22  | 3.48E-02 | 1.60  | 3.68E-03 |
| <i>Rbm27</i>  | -1.09 | 3.27E-07 | -1.14 | 6.10E-07 | -1.14 | 1.49E-07 |
| <i>Rbm3</i>   | -1.09 | 8.52E-08 | -1.29 | 6.99E-08 | -1.37 | 9.28E-09 |
| <i>Rbm39</i>  | -1.07 | 1.15E-07 | -1.11 | 2.26E-07 | -1.05 | 8.29E-08 |
| <i>Rbpj</i>   | -1.46 | 3.97E-07 | -1.49 | 9.37E-07 | -1.59 | 1.38E-07 |
| <i>Rbpms</i>  | 2.60  | 8.71E-05 | 2.63  | 1.97E-04 | 1.51  | 4.45E-03 |
| <i>Rcll</i>   | -1.27 | 4.79E-08 | -1.26 | 1.34E-07 | -1.92 | 1.43E-09 |
| <i>Rcn1</i>   | 2.32  | 3.97E-08 | 2.51  | 5.78E-08 | 1.27  | 3.30E-06 |
| <i>Rcor3</i>  | 1.38  | 4.31E-08 | 1.36  | 1.22E-07 | 1.59  | 8.14E-09 |
| <i>Rdh5</i>   | 1.75  | 6.21E-08 | 1.63  | 2.72E-07 | 2.38  | 3.77E-09 |
| <i>Rdm1</i>   | 1.83  | 1.50E-07 | 1.73  | 6.14E-07 | 2.20  | 2.17E-08 |
| <i>Recql4</i> | -2.21 | 1.11E-05 | -2.74 | 4.97E-06 | -2.66 | 1.81E-06 |
| <i>Rel</i>    | -2.14 | 3.23E-07 | -2.56 | 2.23E-07 | -2.31 | 1.18E-07 |
| <i>Rela</i>   | -1.09 | 2.18E-08 | -1.25 | 2.35E-08 | -1.10 | 9.78E-09 |
| <i>Relb</i>   | -2.16 | 8.81E-08 | -2.50 | 8.23E-08 | -2.70 | 9.54E-09 |
| <i>Rell1</i>  | -1.54 | 1.66E-07 | -2.01 | 6.66E-08 | -2.34 | 4.40E-09 |
| <i>Relt</i>   | 1.02  | 1.38E-07 | 1.02  | 3.76E-07 | 1.15  | 3.29E-08 |
| <i>Rem2</i>   | -1.77 | 1.75E-02 | -1.63 | 4.50E-02 | -1.84 | 1.29E-02 |
| <i>Reps1</i>  | -1.63 | 1.79E-08 | -1.90 | 1.74E-08 | -1.96 | 2.21E-09 |
| <i>Rest</i>   | -1.17 | 2.36E-07 | -1.39 | 1.74E-07 | -1.17 | 1.67E-07 |
| <i>Rfc3</i>   | -1.41 | 1.71E-05 | -1.40 | 5.04E-05 | -1.52 | 7.84E-06 |
| <i>Rfesd</i>  | 1.19  | 1.58E-05 | 1.32  | 1.90E-05 | 1.89  | 2.45E-07 |
| <i>Rgl1</i>   | -2.94 | 2.46E-06 | -2.99 | 5.92E-06 | -3.07 | 1.32E-06 |
| <i>Rgs14</i>  | 0.94  | 8.68E-08 | 1.01  | 1.42E-07 | 1.24  | 6.75E-09 |
| <i>Rgs16</i>  | -2.55 | 8.80E-03 | -3.08 | 5.59E-03 | -4.09 | 2.92E-04 |
| <i>Rgs2</i>   | -3.01 | 5.60E-05 | -4.19 | 9.25E-06 | -4.52 | 1.40E-06 |
| <i>Rhbdf1</i> | -2.41 | 6.79E-03 | -2.91 | 4.28E-03 | -3.06 | 1.24E-03 |
| <i>Rhbdl3</i> | 1.35  | 2.14E-05 | 1.12  | 2.52E-04 | 1.04  | 1.64E-04 |
| <i>Rhod</i>   | -2.15 | 4.37E-04 | -3.14 | 5.35E-05 | -1.36 | 9.29E-03 |
| <i>Rhog</i>   | -1.23 | 1.48E-08 | -1.44 | 1.41E-08 | -1.45 | 2.04E-09 |
| <i>Rhpn2</i>  | -2.94 | 7.78E-05 | -2.80 | 2.89E-04 | -4.10 | 3.75E-06 |
| <i>Rilpl2</i> | -0.92 | 4.94E-07 | -1.33 | 8.25E-08 | -1.09 | 8.24E-08 |
| <i>Rin2</i>   | -2.16 | 3.01E-04 | -3.49 | 1.57E-05 | -3.74 | 2.50E-06 |
| <i>Riok1</i>  | -1.81 | 2.33E-07 | -2.08 | 2.18E-07 | -2.30 | 2.28E-08 |
| <i>Ripk2</i>  | -1.82 | 5.78E-08 | -1.93 | 9.81E-08 | -1.81 | 3.40E-08 |

|                      |       |          |       |          |       |          |
|----------------------|-------|----------|-------|----------|-------|----------|
| <i>Rlf</i>           | -1.34 | 1.88E-07 | -1.47 | 2.43E-07 | -1.36 | 1.12E-07 |
| <i>Rlim</i>          | -1.31 | 2.05E-07 | -1.41 | 2.97E-07 | -1.51 | 4.21E-08 |
| <i>Rmi2</i>          | 2.22  | 3.21E-08 | 2.52  | 3.52E-08 | 2.89  | 2.44E-09 |
| <i>Rmnd1</i>         | 1.02  | 7.89E-09 | 1.16  | 8.67E-09 | 1.21  | 9.40E-10 |
| <i>Rnaset2b</i>      | 1.06  | 9.63E-08 | 1.03  | 3.16E-07 | 1.04  | 6.68E-08 |
| <i>Rnd1</i>          | -1.41 | 3.34E-03 | -1.56 | 3.60E-03 | -1.79 | 5.45E-04 |
| <i>Rnf103</i>        | -1.15 | 2.53E-07 | -1.32 | 2.34E-07 | -1.10 | 2.62E-07 |
| <i>Rnf125</i>        | -2.22 | 1.38E-06 | -2.74 | 6.74E-07 | -2.70 | 1.96E-07 |
| <i>Rnf135</i>        | 0.98  | 4.95E-04 | 1.41  | 6.51E-05 | 1.74  | 3.39E-06 |
| <i>Rnf145</i>        | -1.48 | 5.21E-08 | -1.62 | 7.26E-08 | -1.42 | 3.96E-08 |
| <i>Rnf149</i>        | -1.11 | 9.69E-08 | -1.32 | 7.58E-08 | -1.31 | 1.58E-08 |
| <i>Rnf185</i>        | -1.01 | 6.26E-06 | -1.23 | 3.40E-06 | -1.12 | 2.06E-06 |
| <i>Rnf19a</i>        | -1.78 | 3.33E-07 | -2.09 | 2.60E-07 | -2.08 | 6.48E-08 |
| <i>Rnf19b</i>        | -1.14 | 7.13E-07 | -1.22 | 1.17E-06 | -1.10 | 7.38E-07 |
| <i>Rnf2</i>          | -1.10 | 8.01E-07 | -1.15 | 1.45E-06 | -1.16 | 3.53E-07 |
| <i>Rnf208</i>        | -1.53 | 2.65E-02 | -1.89 | 1.61E-02 | -2.09 | 4.14E-03 |
| <i>Rnf24</i>         | -1.98 | 2.29E-07 | -2.36 | 1.66E-07 | -2.70 | 1.36E-08 |
| <i>Rnf32</i>         | 1.61  | 1.35E-05 | 1.42  | 1.01E-04 | 2.63  | 1.56E-07 |
| <i>Rnf39</i>         | -2.76 | 8.28E-04 | -3.50 | 3.26E-04 | -1.55 | 2.80E-02 |
| <i>Rnf4</i>          | -1.22 | 1.50E-07 | -1.28 | 2.68E-07 | -1.34 | 4.35E-08 |
| <i>Rnf41</i>         | 1.00  | 2.63E-09 | 1.08  | 4.20E-09 | 1.09  | 4.66E-10 |
| <i>Rnf5</i>          | 1.52  | 6.57E-09 | 1.58  | 1.27E-08 | 1.51  | 2.57E-09 |
| <i>Rora</i>          | -1.97 | 2.90E-07 | -2.40 | 1.75E-07 | -2.04 | 1.55E-07 |
| <i>RP23-113O9.4</i>  | 2.01  | 9.81E-04 | 1.35  | 2.45E-02 | 2.66  | 9.70E-05 |
| <i>RP23-286M3.5</i>  | 2.12  | 7.73E-03 | 2.33  | 8.70E-03 | 3.29  | 3.23E-04 |
| <i>RP23-364E18.2</i> | 2.21  | 3.27E-05 | 2.80  | 1.20E-05 | 3.27  | 9.02E-07 |
| <i>RP23-441I24.5</i> | 1.14  | 5.54E-05 | 1.78  | 3.55E-06 | 1.94  | 4.55E-07 |
| <i>RP24-140D11.4</i> | -2.45 | 1.30E-04 | -1.97 | 1.61E-03 | -2.19 | 2.77E-04 |
| <i>RP24-492O4.9</i>  | -1.27 | 3.64E-02 | -1.43 | 3.59E-02 | -1.99 | 2.50E-03 |
| <i>Rp2h</i>          | 1.22  | 1.09E-07 | 1.30  | 1.73E-07 | 1.28  | 4.39E-08 |
| <i>Rpl22l1</i>       | -1.36 | 1.99E-07 | -1.21 | 1.38E-06 | -1.65 | 2.81E-08 |
| <i>Rpl23a</i>        | -1.02 | 2.49E-06 | -0.99 | 8.70E-06 | -1.37 | 1.52E-07 |
| <i>Rprd1a</i>        | 1.11  | 7.05E-07 | 1.52  | 1.66E-07 | 1.34  | 1.02E-07 |
| <i>Rps6kl1</i>       | -1.86 | 5.62E-06 | -2.19 | 3.79E-06 | -2.03 | 2.04E-06 |
| <i>Rrad</i>          | -1.92 | 1.05E-07 | -2.39 | 5.96E-08 | -2.48 | 8.94E-09 |
| <i>Rras</i>          | 0.89  | 1.78E-04 | 1.10  | 8.45E-05 | 1.21  | 1.22E-05 |
| <i>Rras2</i>         | -1.93 | 1.54E-07 | -2.16 | 1.74E-07 | -2.67 | 8.17E-09 |
| <i>Rrm2b</i>         | 1.70  | 2.90E-08 | 1.77  | 5.29E-08 | 1.94  | 5.30E-09 |

|                 |       |          |       |          |       |          |
|-----------------|-------|----------|-------|----------|-------|----------|
| <i>Rrp12</i>    | -1.29 | 2.82E-08 | -1.37 | 4.61E-08 | -2.13 | 4.66E-10 |
| <i>Rrp15</i>    | -1.31 | 6.19E-07 | -1.54 | 4.68E-07 | -2.11 | 9.98E-09 |
| <i>Rslcan18</i> | 1.63  | 3.83E-02 | 2.27  | 1.26E-02 | 2.00  | 1.27E-02 |
| <i>Rsph10b</i>  | 1.49  | 8.71E-04 | 1.94  | 2.80E-04 | 2.52  | 1.02E-05 |
| <i>Rufy4</i>    | 1.48  | 7.47E-05 | 1.18  | 1.04E-03 | 1.75  | 1.51E-05 |
| <i>Rundc3b</i>  | -1.24 | 8.07E-07 | -1.24 | 2.17E-06 | -1.12 | 1.40E-06 |
| <i>Rwdd3</i>    | 0.99  | 5.59E-04 | 1.11  | 5.61E-04 | 1.40  | 2.92E-05 |
| <i>Rybp</i>     | -1.35 | 4.97E-07 | -1.49 | 6.14E-07 | -1.53 | 1.26E-07 |
| <i>S100a10</i>  | 1.36  | 1.65E-09 | 1.60  | 1.27E-09 | 1.69  | 8.35E-11 |
| <i>S100a11</i>  | 1.12  | 3.90E-05 | 1.12  | 1.01E-04 | 1.09  | 4.11E-05 |
| <i>S1pr4</i>    | 0.99  | 4.12E-08 | 1.10  | 4.94E-08 | 1.35  | 2.37E-09 |
| <i>Sag</i>      | 1.47  | 5.85E-07 | 1.30  | 4.68E-06 | 2.09  | 2.40E-08 |
| <i>Samd1</i>    | 1.69  | 1.59E-08 | 1.64  | 4.62E-08 | 1.67  | 7.73E-09 |
| <i>Samd14</i>   | 1.23  | 2.29E-03 | 0.89  | 3.08E-02 | 1.50  | 4.90E-04 |
| <i>Samd8</i>    | -1.74 | 1.37E-07 | -2.01 | 1.24E-07 | -2.00 | 2.82E-08 |
| <i>Samd9l</i>   | 0.75  | 1.04E-05 | 1.03  | 2.00E-06 | 1.82  | 5.77E-09 |
| <i>Samhd1</i>   | 1.31  | 1.52E-08 | 1.61  | 1.05E-08 | 4.09  | 6.19E-12 |
| <i>Samsn1</i>   | -1.44 | 3.96E-06 | -1.62 | 3.99E-06 | -2.01 | 1.72E-07 |
| <i>Sap30bp</i>  | -1.08 | 1.53E-08 | -1.19 | 2.01E-08 | -1.14 | 4.59E-09 |
| <i>Sapcd2</i>   | -2.01 | 4.03E-03 | -3.21 | 3.21E-04 | -3.06 | 1.64E-04 |
| <i>Sarm1</i>    | 2.04  | 6.04E-09 | 2.04  | 1.40E-08 | 1.84  | 4.44E-09 |
| <i>Sass6</i>    | 0.75  | 2.08E-04 | 1.09  | 2.52E-05 | 1.12  | 6.11E-06 |
| <i>Sbsn</i>     | 1.58  | 1.53E-07 | 1.38  | 1.15E-06 | 2.11  | 1.02E-08 |
| <i>Sbspon</i>   | 1.73  | 1.30E-02 | 1.52  | 4.40E-02 | 2.30  | 1.99E-03 |
| <i>Scai</i>     | 0.87  | 1.06E-07 | 1.10  | 5.48E-08 | 1.16  | 7.30E-09 |
| <i>Scamp1</i>   | -1.85 | 9.62E-05 | -2.39 | 2.97E-05 | -3.07 | 1.01E-06 |
| <i>Scarfl</i>   | 2.10  | 6.00E-07 | 2.64  | 2.68E-07 | 2.49  | 1.03E-07 |
| <i>Scd1</i>     | -1.24 | 4.07E-04 | -1.94 | 2.68E-05 | -1.43 | 1.09E-04 |
| <i>Scd2</i>     | -2.17 | 1.80E-07 | -2.68 | 1.02E-07 | -2.85 | 1.38E-08 |
| <i>Scfd2</i>    | -0.79 | 1.68E-05 | -1.05 | 4.38E-06 | -1.14 | 5.99E-07 |
| <i>Scn11a</i>   | -1.36 | 3.91E-02 | -3.08 | 4.97E-04 | -2.07 | 3.37E-03 |
| <i>Scrn3</i>    | 1.11  | 3.71E-06 | 0.96  | 3.48E-05 | 1.61  | 1.20E-07 |
| <i>Scrt1</i>    | -1.73 | 4.39E-03 | -1.78 | 7.51E-03 | -1.32 | 2.00E-02 |
| <i>Sdad1</i>    | -1.06 | 2.37E-08 | -1.11 | 4.51E-08 | -1.28 | 2.99E-09 |
| <i>Sdc1</i>     | -1.56 | 3.07E-02 | -2.39 | 5.29E-03 | -2.67 | 1.05E-03 |
| <i>Sde2</i>     | -1.23 | 1.95E-07 | -1.47 | 1.38E-07 | -1.38 | 5.00E-08 |
| <i>Sdhaf3</i>   | 1.50  | 5.92E-06 | 1.43  | 2.31E-05 | 1.43  | 7.21E-06 |
| <i>Sec14l1</i>  | 1.13  | 1.79E-06 | 1.17  | 3.60E-06 | 1.22  | 6.93E-07 |

|                 |       |          |       |          |       |          |
|-----------------|-------|----------|-------|----------|-------|----------|
| <i>Sec24d</i>   | -1.06 | 3.85E-07 | -1.11 | 7.14E-07 | -1.62 | 9.07E-09 |
| <i>Sec62</i>    | -1.06 | 6.47E-08 | -1.05 | 1.73E-07 | -1.08 | 3.28E-08 |
| <i>Sele</i>     | 0.80  | 8.25E-03 | 1.65  | 1.01E-04 | 2.57  | 6.78E-07 |
| <i>Selk</i>     | -1.18 | 2.56E-08 | -1.31 | 3.33E-08 | -1.30 | 6.36E-09 |
| <i>Sell</i>     | 1.71  | 7.11E-10 | 1.76  | 1.11E-09 | 2.54  | 8.65E-12 |
| <i>Selo</i>     | 1.21  | 3.74E-08 | 1.22  | 8.68E-08 | 1.35  | 8.78E-09 |
| <i>Senp8</i>    | 2.18  | 3.07E-07 | 1.98  | 1.82E-06 | 2.67  | 4.02E-08 |
| <i>Sepr1</i>    | -1.89 | 1.71E-06 | -2.07 | 2.21E-06 | -2.66 | 7.16E-08 |
| <i>Sept4</i>    | 2.49  | 7.96E-07 | 2.38  | 3.16E-06 | 2.00  | 4.07E-06 |
| <i>Serf1</i>    | 1.95  | 8.85E-05 | 1.89  | 2.85E-04 | 1.34  | 1.40E-03 |
| <i>Serinc1</i>  | -1.51 | 1.88E-07 | -1.65 | 2.54E-07 | -1.57 | 8.57E-08 |
| <i>Sertad3</i>  | 1.53  | 1.57E-08 | 1.80  | 1.47E-08 | 1.66  | 3.88E-09 |
| <i>Sesn2</i>    | -1.68 | 3.45E-05 | -2.25 | 8.04E-06 | -2.56 | 7.64E-07 |
| <i>Sf3b4</i>    | -0.92 | 1.31E-07 | -1.02 | 1.61E-07 | -1.12 | 1.71E-08 |
| <i>Sfmbt1</i>   | -1.18 | 5.49E-07 | -1.28 | 7.39E-07 | -1.23 | 2.68E-07 |
| <i>Sfpq</i>     | -1.31 | 5.78E-08 | -1.33 | 1.32E-07 | -1.41 | 1.85E-08 |
| <i>Sfxn4</i>    | 1.32  | 1.84E-06 | 1.66  | 7.51E-07 | 1.95  | 5.03E-08 |
| <i>Sgip1</i>    | -2.04 | 6.48E-04 | -2.19 | 9.07E-04 | -2.49 | 1.19E-04 |
| <i>Sgms1</i>    | -1.94 | 5.72E-07 | -2.27 | 4.39E-07 | -1.39 | 7.56E-06 |
| <i>Sgtb</i>     | -2.75 | 6.26E-06 | -3.89 | 9.66E-07 | -4.03 | 1.82E-07 |
| <i>Sh2d2a</i>   | -1.74 | 4.64E-08 | -2.00 | 4.71E-08 | -1.48 | 9.56E-08 |
| <i>Sh2d3c</i>   | 2.19  | 5.89E-09 | 2.13  | 1.59E-08 | 2.47  | 9.32E-10 |
| <i>Sh2d5</i>    | 1.66  | 8.82E-03 | 1.88  | 8.31E-03 | 2.12  | 1.63E-03 |
| <i>Sh3d21</i>   | -1.12 | 1.00E-02 | -1.11 | 1.96E-02 | -1.05 | 1.32E-02 |
| <i>Sh3pxd2a</i> | -1.19 | 1.21E-08 | -1.27 | 1.97E-08 | -1.37 | 1.97E-09 |
| <i>Shb</i>      | -2.22 | 4.13E-06 | -2.77 | 1.85E-06 | -3.95 | 2.56E-08 |
| <i>Shcbp1</i>   | -2.73 | 1.05E-02 | -2.84 | 1.57E-02 | -3.77 | 1.14E-03 |
| <i>Shd</i>      | -1.99 | 1.82E-02 | -2.42 | 1.18E-02 | -2.13 | 1.17E-02 |
| <i>Shisa8</i>   | 1.59  | 1.63E-03 | 1.78  | 1.68E-03 | 1.67  | 1.06E-03 |
| <i>Siah2</i>    | -1.29 | 3.19E-07 | -1.46 | 3.10E-07 | -1.46 | 7.72E-08 |
| <i>Sidt2</i>    | -1.02 | 2.99E-08 | -1.15 | 3.52E-08 | -1.13 | 7.11E-09 |
| <i>Sigirr</i>   | 1.81  | 2.63E-09 | 1.68  | 8.67E-09 | 2.18  | 2.32E-10 |
| <i>Sik1</i>     | -2.62 | 3.97E-06 | -3.46 | 1.10E-06 | -4.13 | 6.38E-08 |
| <i>Sike1</i>    | 1.52  | 2.33E-08 | 1.71  | 2.71E-08 | 1.84  | 2.89E-09 |
| <i>Sirt3</i>    | 1.03  | 8.94E-05 | 0.94  | 4.52E-04 | 1.18  | 2.28E-05 |
| <i>Sirt5</i>    | 1.38  | 2.61E-05 | 1.89  | 5.15E-06 | 1.46  | 1.36E-05 |
| <i>Sirt6</i>    | 1.23  | 1.45E-07 | 1.07  | 1.11E-06 | 1.45  | 2.43E-08 |
| <i>Six1</i>     | -2.72 | 4.82E-03 | -4.71 | 2.08E-04 | -5.58 | 1.65E-05 |



|                    |       |          |       |          |       |          |
|--------------------|-------|----------|-------|----------|-------|----------|
| <i>Six4</i>        | -3.06 | 1.02E-03 | -4.31 | 1.81E-04 | -5.17 | 1.27E-05 |
| <i>Ska3</i>        | -2.18 | 3.37E-03 | -2.83 | 1.20E-03 | -3.00 | 2.93E-04 |
| <i>Ski</i>         | -0.95 | 2.08E-09 | -1.12 | 1.95E-09 | -1.04 | 2.83E-10 |
| <i>Skil</i>        | -2.04 | 2.13E-07 | -2.33 | 2.06E-07 | -2.40 | 3.84E-08 |
| <i>Slamf6</i>      | 2.09  | 1.65E-09 | 2.25  | 2.25E-09 | 1.09  | 2.80E-08 |
| <i>Slbp</i>        | -0.85 | 7.51E-05 | -1.10 | 2.34E-05 | -1.51 | 4.68E-07 |
| <i>Slc15a1</i>     | -2.85 | 3.17E-03 | -3.09 | 3.92E-03 | -3.56 | 5.76E-04 |
| <i>Slc16a1</i>     | -1.64 | 8.74E-07 | -1.98 | 5.16E-07 | -2.72 | 1.05E-08 |
| <i>Slc16a13</i>    | 1.07  | 1.75E-04 | 0.87  | 1.94E-03 | 1.00  | 2.63E-04 |
| <i>Slc16a3</i>     | -1.40 | 3.07E-04 | -1.79 | 1.12E-04 | -1.63 | 7.99E-05 |
| <i>Slc16a4</i>     | 1.10  | 1.01E-02 | 1.44  | 3.74E-03 | 1.05  | 1.19E-02 |
| <i>Slc17a5</i>     | 1.28  | 6.13E-09 | 1.26  | 1.58E-08 | 1.52  | 7.15E-10 |
| <i>Slc17a9</i>     | 2.80  | 4.70E-09 | 3.01  | 7.55E-09 | 1.52  | 1.47E-07 |
| <i>Slc19a2</i>     | -0.98 | 1.02E-04 | -1.04 | 1.57E-04 | -1.04 | 5.20E-05 |
| <i>Slc1a4</i>      | -3.44 | 8.00E-04 | -2.82 | 6.74E-03 | -3.78 | 3.46E-04 |
| <i>Slc22a15</i>    | -1.61 | 1.78E-04 | -1.10 | 6.15E-03 | -2.06 | 1.91E-05 |
| <i>Slc22a23</i>    | 1.11  | 3.38E-04 | 1.09  | 9.34E-04 | 2.58  | 2.20E-07 |
| <i>Slc23a2</i>     | -1.03 | 1.07E-07 | -1.12 | 1.54E-07 | -1.08 | 4.45E-08 |
| <i>Slc25a19</i>    | 1.02  | 2.35E-09 | 1.01  | 5.69E-09 | 1.04  | 5.75E-10 |
| <i>Slc25a23</i>    | 1.07  | 7.19E-07 | 1.17  | 1.02E-06 | 1.04  | 7.09E-07 |
| <i>Slc25a25</i>    | -0.93 | 1.29E-08 | -1.08 | 1.27E-08 | -1.44 | 3.10E-10 |
| <i>Slc25a27</i>    | 2.65  | 1.38E-08 | 2.56  | 4.17E-08 | 2.98  | 2.53E-09 |
| <i>Slc25a36</i>    | -1.43 | 2.82E-08 | -1.68 | 2.55E-08 | -1.56 | 7.46E-09 |
| <i>Slc25a45</i>    | 1.08  | 5.61E-09 | 1.22  | 7.05E-09 | 1.46  | 2.93E-10 |
| <i>Slc26a10</i>    | -1.66 | 2.70E-05 | -2.22 | 6.28E-06 | -1.39 | 1.03E-04 |
| <i>Slc26a6</i>     | 0.83  | 1.78E-04 | 1.10  | 4.38E-05 | 1.14  | 9.75E-06 |
| <i>Slc27a3</i>     | 2.29  | 9.15E-06 | 2.95  | 2.94E-06 | 2.76  | 1.44E-06 |
| <i>Slc27a5</i>     | 1.26  | 2.21E-03 | 1.41  | 2.29E-03 | 1.88  | 9.44E-05 |
| <i>Slc2a4rg-ps</i> | 1.58  | 5.76E-09 | 1.73  | 8.39E-09 | 2.09  | 3.29E-10 |
| <i>Slc30a1</i>     | -1.55 | 5.71E-07 | -1.66 | 9.15E-07 | -1.62 | 2.94E-07 |
| <i>Slc31a1</i>     | -1.66 | 2.71E-07 | -1.82 | 3.62E-07 | -2.19 | 2.04E-08 |
| <i>Slc35a5</i>     | 0.85  | 1.55E-05 | 1.06  | 6.43E-06 | 1.31  | 2.98E-07 |
| <i>Slc35d1</i>     | -1.60 | 1.68E-07 | -1.69 | 2.87E-07 | -2.00 | 1.84E-08 |
| <i>Slc35d2</i>     | 1.28  | 4.65E-07 | 1.15  | 3.05E-06 | 1.94  | 1.18E-08 |
| <i>Slc35f5</i>     | -1.87 | 1.80E-03 | -2.22 | 1.18E-03 | -1.86 | 1.71E-03 |
| <i>Slc38a10</i>    | -1.01 | 1.52E-07 | -1.13 | 1.67E-07 | -1.24 | 1.95E-08 |
| <i>Slc38a2</i>     | -1.26 | 1.67E-07 | -1.36 | 2.50E-07 | -1.76 | 8.46E-09 |
| <i>Slc38a3</i>     | -2.95 | 3.51E-04 | -3.64 | 1.65E-04 | -3.42 | 9.40E-05 |

|                  |       |          |       |          |       |          |
|------------------|-------|----------|-------|----------|-------|----------|
| <i>Slc39a2</i>   | 1.35  | 1.07E-04 | 1.77  | 2.91E-05 | 1.67  | 1.53E-05 |
| <i>Slc3a2</i>    | -1.58 | 1.84E-07 | -1.86 | 1.42E-07 | -1.62 | 9.69E-08 |
| <i>Slc4a10</i>   | 2.34  | 1.07E-06 | 2.72  | 8.61E-07 | 2.82  | 1.62E-07 |
| <i>Slc4a4</i>    | -1.88 | 1.36E-02 | -2.96 | 1.56E-03 | -2.76 | 1.03E-03 |
| <i>Slc5a2</i>    | -2.92 | 2.93E-04 | -3.32 | 2.68E-04 | -4.80 | 3.84E-06 |
| <i>Slc6a19</i>   | 1.27  | 2.37E-04 | 0.80  | 1.20E-02 | 2.73  | 2.90E-07 |
| <i>Slc6a19os</i> | 2.60  | 2.82E-03 | 3.10  | 1.87E-03 | 1.54  | 4.86E-02 |
| <i>Slc6a8</i>    | -1.21 | 5.98E-03 | -1.45 | 3.99E-03 | -1.23 | 5.01E-03 |
| <i>Slc7a1</i>    | -1.36 | 8.63E-09 | -1.49 | 1.27E-08 | -2.18 | 1.85E-10 |
| <i>Slc7a3</i>    | 1.23  | 2.05E-03 | 2.08  | 8.85E-05 | 1.70  | 1.57E-04 |
| <i>Slc7a5</i>    | -1.90 | 3.01E-06 | -2.02 | 4.98E-06 | -3.68 | 1.03E-08 |
| <i>Slfn1</i>     | 1.06  | 1.13E-08 | 1.21  | 1.28E-08 | 1.67  | 2.63E-10 |
| <i>Slk</i>       | -1.05 | 4.31E-07 | -1.14 | 5.89E-07 | -1.23 | 8.29E-08 |
| <i>Slpi</i>      | 1.14  | 2.25E-02 | 1.56  | 7.29E-03 | 1.42  | 5.91E-03 |
| <i>Slx1b</i>     | 1.21  | 2.97E-06 | 1.26  | 5.76E-06 | 1.31  | 1.14E-06 |
| <i>Smad6</i>     | -2.27 | 9.25E-04 | -3.63 | 5.67E-05 | -1.59 | 9.01E-03 |
| <i>Smad7</i>     | -1.37 | 9.93E-09 | -1.52 | 1.27E-08 | -1.34 | 4.76E-09 |
| <i>Smarca5</i>   | -1.07 | 1.27E-06 | -1.16 | 1.76E-06 | -1.23 | 2.89E-07 |
| <i>Smarcd3</i>   | 2.32  | 7.87E-06 | 2.11  | 4.61E-05 | 3.34  | 2.66E-07 |
| <i>Smarcel</i>   | -1.04 | 2.33E-09 | -1.04 | 5.61E-09 | -1.15 | 3.54E-10 |
| <i>Smim13</i>    | -1.25 | 1.64E-06 | -1.40 | 1.87E-06 | -1.41 | 4.61E-07 |
| <i>Smim3</i>     | -2.00 | 1.80E-03 | -3.15 | 1.36E-04 | -2.89 | 9.16E-05 |
| <i>Smndc1</i>    | -1.04 | 9.38E-07 | -1.08 | 1.92E-06 | -1.11 | 4.00E-07 |
| <i>Smox</i>      | -1.56 | 3.38E-07 | -1.85 | 2.36E-07 | -2.06 | 2.40E-08 |
| <i>Snn</i>       | 1.62  | 1.30E-08 | 1.53  | 4.51E-08 | 1.31  | 2.70E-08 |
| <i>Snrpd1</i>    | -1.08 | 2.33E-06 | -1.12 | 4.96E-06 | -1.82 | 2.29E-08 |
| <i>Snx18</i>     | -1.88 | 4.07E-08 | -2.25 | 3.20E-08 | -2.40 | 3.65E-09 |
| <i>Snx32</i>     | 2.50  | 1.28E-07 | 2.39  | 4.67E-07 | 2.81  | 3.12E-08 |
| <i>Snx9</i>      | -0.92 | 7.48E-04 | -1.07 | 5.42E-04 | -1.38 | 2.29E-05 |
| <i>Socs1</i>     | 2.30  | 4.12E-08 | 2.17  | 1.51E-07 | 3.03  | 2.99E-09 |
| <i>Sorbs3</i>    | 1.53  | 5.80E-06 | 1.44  | 2.55E-05 | 1.37  | 1.19E-05 |
| <i>Sord</i>      | -1.12 | 2.20E-05 | -1.05 | 9.63E-05 | -1.52 | 1.30E-06 |
| <i>Sos1</i>      | -1.10 | 3.53E-08 | -1.15 | 6.86E-08 | -1.20 | 9.74E-09 |
| <i>Sowahc</i>    | -1.07 | 2.17E-02 | -1.74 | 2.26E-03 | -1.64 | 1.44E-03 |
| <i>Sox4</i>      | -1.71 | 1.82E-07 | -2.02 | 1.39E-07 | -2.14 | 2.02E-08 |
| <i>Sp3os</i>     | 2.13  | 1.04E-06 | 2.16  | 2.55E-06 | 2.43  | 2.54E-07 |
| <i>Spag1</i>     | 0.89  | 1.07E-05 | 1.16  | 3.29E-06 | 1.36  | 2.24E-07 |
| <i>Spag4</i>     | -2.86 | 7.24E-05 | -3.69 | 2.29E-05 | -4.79 | 6.95E-07 |

|                 |       |          |       |          |       |          |
|-----------------|-------|----------|-------|----------|-------|----------|
| <i>Spag5</i>    | -2.14 | 1.64E-04 | -2.29 | 2.36E-04 | -3.94 | 7.38E-07 |
| <i>Spag9</i>    | -1.19 | 5.31E-08 | -1.19 | 1.31E-07 | -1.30 | 1.48E-08 |
| <i>Spata13</i>  | -1.36 | 1.17E-08 | -1.57 | 1.22E-08 | -1.24 | 9.74E-09 |
| <i>Spata2</i>   | -1.35 | 1.03E-07 | -1.50 | 1.27E-07 | -1.61 | 1.62E-08 |
| <i>Spata32</i>  | -2.25 | 2.59E-02 | -2.48 | 2.82E-02 | -2.33 | 2.03E-02 |
| <i>Spata9</i>   | 1.53  | 6.70E-03 | 1.97  | 2.75E-03 | 2.41  | 2.37E-04 |
| <i>Spatc1</i>   | 1.13  | 4.81E-02 | 1.46  | 2.46E-02 | 1.54  | 9.17E-03 |
| <i>Spatc11</i>  | 2.04  | 6.82E-03 | 2.11  | 1.09E-02 | 2.04  | 6.22E-03 |
| <i>Spc25</i>    | 1.15  | 1.08E-02 | 1.59  | 2.91E-03 | 1.29  | 4.90E-03 |
| <i>Spdl1</i>    | -1.55 | 1.12E-04 | -1.66 | 1.67E-04 | -1.88 | 1.82E-05 |
| <i>Spefl</i>    | 1.59  | 7.14E-05 | 1.09  | 3.08E-03 | 1.70  | 3.63E-05 |
| <i>Spice1</i>   | 1.24  | 4.36E-09 | 1.38  | 5.65E-09 | 1.83  | 1.18E-10 |
| <i>Spon1</i>    | -2.64 | 7.60E-07 | -3.35 | 3.09E-07 | -3.90 | 2.24E-08 |
| <i>Sppl2b</i>   | 1.07  | 6.51E-06 | 0.87  | 9.39E-05 | 1.22  | 1.66E-06 |
| <i>Spred1</i>   | -1.88 | 2.16E-06 | -2.17 | 1.86E-06 | -1.73 | 3.59E-06 |
| <i>Spred2</i>   | -2.43 | 3.19E-07 | -2.95 | 1.91E-07 | -3.09 | 3.04E-08 |
| <i>Sprtn</i>    | -0.94 | 1.40E-08 | -1.14 | 1.05E-08 | -1.11 | 1.95E-09 |
| <i>Spsb1</i>    | -1.97 | 1.09E-07 | -2.55 | 4.74E-08 | -2.20 | 2.77E-08 |
| <i>Spty2d1</i>  | -1.13 | 2.65E-06 | -1.28 | 2.70E-06 | -1.24 | 9.49E-07 |
| <i>Sqrdl</i>    | 1.38  | 1.33E-07 | 1.26  | 7.08E-07 | 1.27  | 1.63E-07 |
| <i>Sqstm1</i>   | -1.09 | 4.70E-09 | -1.18 | 7.05E-09 | -1.21 | 7.25E-10 |
| <i>Srebfl</i>   | -0.91 | 7.75E-07 | -1.04 | 7.24E-07 | -1.00 | 2.61E-07 |
| <i>Srek1</i>    | -0.98 | 6.39E-08 | -1.05 | 9.87E-08 | -1.05 | 2.17E-08 |
| <i>Srfbp1</i>   | -1.13 | 3.73E-07 | -1.30 | 3.30E-07 | -1.44 | 3.55E-08 |
| <i>Srgn</i>     | -1.77 | 4.69E-08 | -2.05 | 4.54E-08 | -1.17 | 7.74E-07 |
| <i>Srp54a</i>   | -1.41 | 2.42E-02 | -2.12 | 4.44E-03 | -2.41 | 7.31E-04 |
| <i>Srpr</i>     | -0.94 | 2.82E-09 | -1.06 | 3.71E-09 | -1.04 | 4.66E-10 |
| <i>Srr</i>      | 0.88  | 1.66E-03 | 1.04  | 1.20E-03 | 1.22  | 1.22E-04 |
| <i>Srrd</i>     | -1.31 | 1.48E-05 | -1.30 | 4.21E-05 | -1.29 | 1.42E-05 |
| <i>Ss18</i>     | -1.46 | 3.21E-08 | -1.61 | 4.41E-08 | -1.42 | 2.04E-08 |
| <i>Ssh2</i>     | -1.28 | 4.19E-08 | -1.27 | 1.08E-07 | -1.28 | 2.20E-08 |
| <i>Stac3</i>    | 1.87  | 5.15E-04 | 2.72  | 6.60E-05 | 2.11  | 1.77E-04 |
| <i>Stard3nl</i> | 1.14  | 2.44E-08 | 1.14  | 6.01E-08 | 1.28  | 5.15E-09 |
| <i>Stat4</i>    | 1.06  | 4.17E-08 | 1.05  | 1.13E-07 | 1.00  | 3.41E-08 |
| <i>Stat5a</i>   | -2.36 | 3.67E-08 | -2.78 | 3.20E-08 | -2.77 | 5.87E-09 |
| <i>Stau1</i>    | -1.07 | 1.18E-07 | -1.09 | 2.68E-07 | -1.09 | 6.06E-08 |
| <i>Stil</i>     | -3.13 | 5.00E-04 | -4.32 | 9.71E-05 | -5.03 | 8.35E-06 |
| <i>Stk17b</i>   | -1.34 | 3.73E-07 | -1.58 | 2.89E-07 | -1.23 | 5.60E-07 |

|                |       |          |       |          |       |          |
|----------------|-------|----------|-------|----------|-------|----------|
| <i>Stkld1</i>  | 1.13  | 2.80E-02 | 1.84  | 3.10E-03 | 1.66  | 2.59E-03 |
| <i>Stmn1</i>   | 1.09  | 2.12E-07 | 1.11  | 4.85E-07 | 1.62  | 6.51E-09 |
| <i>Stom</i>    | -2.41 | 1.86E-04 | -2.45 | 3.96E-04 | -2.66 | 7.12E-05 |
| <i>Stoml1</i>  | 1.04  | 2.28E-07 | 0.94  | 1.40E-06 | 1.50  | 8.77E-09 |
| <i>Ston1</i>   | 1.24  | 1.67E-03 | 1.23  | 3.97E-03 | 1.53  | 3.16E-04 |
| <i>Strap</i>   | -1.02 | 1.52E-08 | -1.05 | 3.07E-08 | -1.29 | 1.34E-09 |
| <i>Strc</i>    | 1.66  | 2.14E-04 | 1.58  | 7.57E-04 | 2.68  | 3.23E-06 |
| <i>Strip2</i>  | -2.24 | 1.16E-02 | -1.94 | 4.22E-02 | -3.23 | 9.33E-04 |
| <i>Stt3b</i>   | -1.20 | 6.37E-08 | -1.30 | 9.63E-08 | -1.43 | 1.02E-08 |
| <i>Stx11</i>   | -1.93 | 2.64E-05 | -2.23 | 2.05E-05 | -2.69 | 1.21E-06 |
| <i>Stx16</i>   | 1.00  | 9.80E-09 | 1.07  | 1.53E-08 | 1.28  | 7.41E-10 |
| <i>Stx2</i>    | 1.86  | 2.03E-08 | 1.81  | 5.65E-08 | 1.90  | 7.98E-09 |
| <i>Stx6</i>    | -1.11 | 7.23E-07 | -1.31 | 5.24E-07 | -1.25 | 1.89E-07 |
| <i>Stxbp1</i>  | 1.51  | 3.98E-08 | 1.43  | 1.38E-07 | 1.91  | 3.73E-09 |
| <i>Stxbp4</i>  | 1.17  | 9.04E-05 | 1.30  | 9.97E-05 | 1.37  | 1.95E-05 |
| <i>Sub1</i>    | -1.53 | 5.83E-08 | -1.67 | 8.10E-08 | -1.85 | 7.83E-09 |
| <i>Sult1a1</i> | 1.29  | 4.72E-04 | 1.45  | 4.61E-04 | 1.56  | 9.10E-05 |
| <i>Sult2b1</i> | -1.37 | 5.80E-04 | -1.25 | 2.53E-03 | -1.02 | 4.31E-03 |
| <i>Sumf2</i>   | 1.31  | 2.29E-07 | 1.25  | 8.65E-07 | 1.50  | 4.84E-08 |
| <i>Sumo1</i>   | -1.13 | 4.43E-08 | -1.14 | 1.03E-07 | -1.16 | 1.87E-08 |
| <i>Supt6</i>   | -0.97 | 5.60E-09 | -1.01 | 9.41E-09 | -1.12 | 7.13E-10 |
| <i>Supv3l1</i> | -1.09 | 2.40E-06 | -1.15 | 4.21E-06 | -1.49 | 1.25E-07 |
| <i>Susd4</i>   | -1.08 | 1.12E-02 | -0.95 | 3.94E-02 | -1.48 | 1.34E-03 |
| <i>Susd6</i>   | -1.23 | 5.67E-09 | -1.38 | 7.28E-09 | -1.01 | 7.82E-09 |
| <i>Suv39h2</i> | -1.38 | 1.38E-05 | -1.45 | 2.52E-05 | -1.95 | 5.76E-07 |
| <i>Syde1</i>   | 1.50  | 1.28E-05 | 1.45  | 4.43E-05 | 1.47  | 1.26E-05 |
| <i>Syde2</i>   | -2.19 | 3.06E-04 | -3.16 | 4.01E-05 | -4.41 | 6.70E-07 |
| <i>Syf2</i>    | -1.19 | 6.13E-09 | -1.25 | 1.05E-08 | -1.11 | 3.73E-09 |
| <i>Syn1</i>    | 1.06  | 5.72E-04 | 1.04  | 1.56E-03 | 1.33  | 8.56E-05 |
| <i>Syn3</i>    | 2.58  | 8.37E-07 | 2.96  | 7.48E-07 | 2.78  | 3.24E-07 |
| <i>Syne2</i>   | 1.40  | 1.38E-08 | 1.43  | 2.82E-08 | 1.42  | 5.08E-09 |
| <i>Synj2</i>   | -1.20 | 1.53E-06 | -1.11 | 7.71E-06 | -1.53 | 1.45E-07 |
| <i>Sypl</i>    | -1.80 | 9.18E-06 | -2.00 | 1.02E-05 | -1.49 | 3.76E-05 |
| <i>Sys1</i>    | -1.20 | 1.68E-05 | -1.36 | 1.61E-05 | -1.51 | 1.88E-06 |
| <i>Sytl2</i>   | -2.59 | 1.59E-05 | -3.10 | 9.49E-06 | -3.15 | 2.35E-06 |
| <i>Sytl3</i>   | -3.07 | 4.71E-04 | -3.46 | 4.64E-04 | -2.31 | 3.33E-03 |
| <i>Tab3</i>    | -1.03 | 9.23E-06 | -1.11 | 1.39E-05 | -1.21 | 1.88E-06 |
| <i>Tacc1</i>   | -1.19 | 6.84E-08 | -1.27 | 1.15E-07 | -1.38 | 1.32E-08 |

|                 |       |          |       |          |       |          |
|-----------------|-------|----------|-------|----------|-------|----------|
| <i>Tacc3</i>    | -1.22 | 3.34E-06 | -1.55 | 1.26E-06 | -1.19 | 3.22E-06 |
| <i>Tacolos</i>  | -2.03 | 7.81E-03 | -1.71 | 3.54E-02 | -1.77 | 1.57E-02 |
| <i>Taf4b</i>    | -2.22 | 1.81E-07 | -2.65 | 1.28E-07 | -2.97 | 1.20E-08 |
| <i>Taf5l</i>    | -0.92 | 7.55E-04 | -1.14 | 3.38E-04 | -1.16 | 1.02E-04 |
| <i>Taf7</i>     | -1.96 | 2.23E-04 | -1.42 | 5.23E-03 | -1.59 | 9.66E-04 |
| <i>Tagap1</i>   | 1.25  | 4.12E-08 | 1.16  | 1.70E-07 | 1.19  | 3.03E-08 |
| <i>Tagln</i>    | -0.87 | 3.21E-03 | -1.13 | 1.15E-03 | -1.00 | 1.07E-03 |
| <i>Tagln2</i>   | 1.00  | 8.63E-09 | 1.11  | 1.14E-08 | 1.04  | 2.59E-09 |
| <i>Tagln3</i>   | 3.16  | 3.96E-06 | 3.50  | 4.69E-06 | 3.63  | 9.34E-07 |
| <i>Tanc1</i>    | -1.27 | 4.31E-08 | -1.26 | 1.13E-07 | -1.35 | 1.45E-08 |
| <i>Tatdn2</i>   | -1.24 | 1.83E-07 | -1.38 | 2.25E-07 | -1.30 | 8.40E-08 |
| <i>Tbc1d10c</i> | 1.03  | 7.51E-07 | 1.10  | 1.21E-06 | 1.13  | 2.39E-07 |
| <i>Tbc1d15</i>  | -1.65 | 1.25E-07 | -1.82 | 1.58E-07 | -1.84 | 3.28E-08 |
| <i>Tbc1d24</i>  | 1.70  | 4.57E-07 | 1.78  | 8.27E-07 | 1.55  | 6.91E-07 |
| <i>Tbc1d30</i>  | -2.03 | 1.02E-07 | -2.44 | 7.48E-08 | -2.02 | 6.33E-08 |
| <i>Tbc1d4</i>   | -1.60 | 1.93E-06 | -1.72 | 3.01E-06 | -1.39 | 5.18E-06 |
| <i>Tbxa2r</i>   | 0.85  | 1.48E-06 | 1.04  | 7.37E-07 | 1.25  | 4.27E-08 |
| <i>Tbxas1</i>   | 1.30  | 3.82E-02 | 1.38  | 4.79E-02 | 2.60  | 4.50E-04 |
| <i>Tceal1</i>   | -3.18 | 2.09E-03 | -4.41 | 4.36E-04 | -5.66 | 1.89E-05 |
| <i>Tceal3</i>   | -2.13 | 4.60E-03 | -3.44 | 3.36E-04 | -4.92 | 5.52E-06 |
| <i>Tcp11l1</i>  | 2.77  | 8.83E-04 | 1.57  | 4.99E-02 | 2.41  | 2.14E-03 |
| <i>Tcp11l2</i>  | -1.66 | 5.17E-08 | -1.84 | 6.86E-08 | -1.72 | 2.20E-08 |
| <i>Tctex1d1</i> | -1.48 | 1.05E-02 | -2.29 | 1.27E-03 | -1.75 | 3.34E-03 |
| <i>Tdg</i>      | -1.38 | 8.42E-08 | -1.50 | 1.14E-07 | -1.59 | 1.64E-08 |
| <i>Tdp2</i>     | -1.16 | 1.20E-06 | -1.22 | 2.26E-06 | -1.33 | 2.89E-07 |
| <i>Tdrkh</i>    | 1.27  | 6.50E-08 | 1.71  | 2.37E-08 | 1.57  | 7.42E-09 |
| <i>Tec</i>      | 2.15  | 5.48E-09 | 2.26  | 8.76E-09 | 1.50  | 2.21E-08 |
| <i>Tecpr1</i>   | 1.31  | 1.87E-08 | 1.37  | 3.57E-08 | 1.24  | 1.30E-08 |
| <i>Teddm3</i>   | 2.21  | 5.59E-03 | 1.65  | 4.83E-02 | 2.27  | 4.29E-03 |
| <i>Tespal</i>   | -1.53 | 4.12E-08 | -1.75 | 4.41E-08 | -1.34 | 6.15E-08 |
| <i>Tex15</i>    | -2.14 | 6.65E-04 | -2.18 | 1.35E-03 | -2.57 | 1.40E-04 |
| <i>Tex22</i>    | 1.39  | 3.12E-03 | 1.68  | 1.88E-03 | 1.54  | 1.40E-03 |
| <i>Tex30</i>    | -1.18 | 8.52E-06 | -1.33 | 8.72E-06 | -1.51 | 8.08E-07 |
| <i>Tfap4</i>    | 1.64  | 5.89E-09 | 1.53  | 1.96E-08 | 1.50  | 3.73E-09 |
| <i>Tfb1m</i>    | 1.02  | 2.63E-04 | 0.96  | 9.87E-04 | 1.35  | 2.19E-05 |
| <i>Tfb2m</i>    | -1.54 | 5.99E-07 | -1.59 | 1.25E-06 | -1.75 | 1.46E-07 |
| <i>Tfcp2</i>    | 1.28  | 7.40E-08 | 1.08  | 7.41E-07 | 1.51  | 1.29E-08 |
| <i>Tfe3</i>     | -1.14 | 8.69E-08 | -1.22 | 1.40E-07 | -1.27 | 2.24E-08 |

|                 |       |          |       |          |       |          |
|-----------------|-------|----------|-------|----------|-------|----------|
| <i>Tfip11</i>   | -1.19 | 9.89E-09 | -1.47 | 7.55E-09 | -1.35 | 1.57E-09 |
| <i>Tgfb1i1</i>  | 0.74  | 5.18E-04 | 1.10  | 5.64E-05 | 1.31  | 3.84E-06 |
| <i>Tgfb3</i>    | -2.75 | 2.57E-04 | -4.58 | 1.01E-05 | -3.66 | 2.09E-05 |
| <i>Tgif1</i>    | -2.55 | 5.83E-07 | -3.15 | 2.96E-07 | -2.92 | 1.35E-07 |
| <i>Tgif2</i>    | -2.57 | 1.48E-08 | -3.29 | 8.67E-09 | -3.80 | 4.70E-10 |
| <i>Tgm1</i>     | -1.86 | 4.53E-02 | -2.20 | 3.59E-02 | -2.38 | 1.23E-02 |
| <i>Tgoln1</i>   | -1.31 | 7.35E-08 | -1.42 | 1.08E-07 | -1.45 | 1.99E-08 |
| <i>Tha1</i>     | 1.71  | 5.86E-06 | 1.47  | 5.80E-05 | 2.47  | 1.94E-07 |
| <i>Thap2</i>    | 1.79  | 5.81E-08 | 2.00  | 7.05E-08 | 1.90  | 2.09E-08 |
| <i>Thap3</i>    | 1.62  | 5.50E-07 | 1.64  | 1.37E-06 | 2.02  | 6.00E-08 |
| <i>Thbs1</i>    | -2.51 | 9.95E-03 | -2.71 | 1.21E-02 | -3.47 | 1.07E-03 |
| <i>Them6</i>    | 1.06  | 4.46E-06 | 0.86  | 6.52E-05 | 1.18  | 1.34E-06 |
| <i>Thra</i>     | 1.76  | 2.63E-09 | 1.83  | 5.57E-09 | 2.26  | 1.85E-10 |
| <i>Thumpd1</i>  | -1.05 | 1.01E-07 | -1.15 | 1.38E-07 | -1.29 | 1.25E-08 |
| <i>Tia1</i>     | 1.51  | 6.82E-08 | 1.68  | 8.48E-08 | 1.65  | 1.97E-08 |
| <i>Ticrr</i>    | -2.72 | 1.34E-03 | -3.50 | 4.93E-04 | -3.90 | 7.21E-05 |
| <i>Tigit</i>    | -3.35 | 8.31E-03 | -5.74 | 4.53E-04 | -6.52 | 5.57E-05 |
| <i>Timm23</i>   | -1.25 | 5.67E-09 | -1.31 | 9.75E-09 | -1.52 | 5.47E-10 |
| <i>Timm8a2</i>  | 1.05  | 9.59E-04 | 0.98  | 3.47E-03 | 1.82  | 9.64E-06 |
| <i>Timmdc1</i>  | 0.96  | 4.55E-08 | 1.04  | 7.05E-08 | 1.13  | 7.58E-09 |
| <i>Tinf2</i>    | -1.07 | 1.18E-07 | -1.33 | 6.52E-08 | -1.07 | 7.09E-08 |
| <i>Tipr1</i>    | -1.47 | 4.37E-07 | -1.80 | 2.46E-07 | -1.75 | 7.21E-08 |
| <i>Tlcd2</i>    | -1.44 | 5.88E-03 | -1.49 | 9.51E-03 | -1.82 | 1.08E-03 |
| <i>Tle4</i>     | -1.65 | 1.30E-08 | -1.81 | 1.74E-08 | -1.53 | 9.58E-09 |
| <i>Tlr1</i>     | 2.10  | 1.67E-09 | 2.28  | 2.53E-09 | 1.61  | 2.33E-09 |
| <i>Tm2d2</i>    | -1.06 | 2.28E-06 | -1.14 | 3.50E-06 | -1.16 | 7.85E-07 |
| <i>Tm6sf2</i>   | 0.99  | 3.01E-02 | 1.67  | 2.81E-03 | 1.51  | 2.34E-03 |
| <i>Tm7sf2</i>   | 1.51  | 1.57E-07 | 1.42  | 6.74E-07 | 1.26  | 4.78E-07 |
| <i>Tma16</i>    | -0.98 | 9.29E-05 | -1.23 | 3.70E-05 | -1.39 | 3.74E-06 |
| <i>Tmc3</i>     | 1.44  | 9.89E-04 | 1.44  | 2.26E-03 | 2.04  | 5.51E-05 |
| <i>Tmc4</i>     | 1.53  | 8.03E-09 | 1.76  | 8.67E-09 | 1.86  | 8.67E-10 |
| <i>Tmc6</i>     | 1.11  | 3.94E-09 | 1.00  | 1.58E-08 | 1.24  | 5.94E-10 |
| <i>Tmc8</i>     | 1.19  | 2.79E-08 | 1.09  | 1.18E-07 | 1.42  | 3.87E-09 |
| <i>Tmco6</i>    | 1.24  | 2.64E-07 | 1.35  | 3.67E-07 | 1.64  | 1.93E-08 |
| <i>Tmem129</i>  | 1.15  | 3.29E-07 | 1.20  | 6.49E-07 | 1.40  | 4.60E-08 |
| <i>Tmem132a</i> | 1.87  | 6.84E-03 | 2.69  | 1.32E-03 | 2.11  | 2.90E-03 |
| <i>Tmem143</i>  | 1.50  | 7.72E-07 | 1.32  | 6.21E-06 | 1.86  | 9.06E-08 |
| <i>Tmem154</i>  | 1.47  | 9.15E-05 | 1.67  | 8.66E-05 | 1.87  | 1.01E-05 |

|                  |       |          |       |          |       |          |
|------------------|-------|----------|-------|----------|-------|----------|
| <i>Tmem194</i>   | 1.14  | 4.22E-08 | 1.29  | 4.78E-08 | 1.60  | 2.08E-09 |
| <i>Tmem220</i>   | 1.27  | 1.96E-02 | 2.25  | 1.10E-03 | 1.43  | 9.51E-03 |
| <i>Tmem221</i>   | 2.63  | 1.34E-06 | 2.78  | 2.37E-06 | 3.25  | 1.67E-07 |
| <i>Tmem222</i>   | -1.07 | 6.53E-08 | -1.19 | 8.39E-08 | -1.29 | 9.63E-09 |
| <i>Tmem230</i>   | 1.01  | 1.09E-07 | 0.97  | 3.97E-07 | 1.36  | 7.30E-09 |
| <i>Tmem248</i>   | -1.45 | 3.19E-08 | -1.62 | 4.10E-08 | -1.60 | 8.04E-09 |
| <i>Tmem251</i>   | -1.71 | 7.36E-03 | -1.49 | 2.91E-02 | -2.26 | 1.03E-03 |
| <i>Tmem38a</i>   | 1.14  | 5.59E-05 | 1.08  | 2.21E-04 | 1.16  | 4.21E-05 |
| <i>Tmem71</i>    | 1.35  | 1.96E-09 | 1.38  | 3.71E-09 | 2.11  | 3.75E-11 |
| <i>Tmem80</i>    | 1.22  | 4.76E-09 | 1.27  | 8.67E-09 | 1.54  | 3.60E-10 |
| <i>Tmem88</i>    | -3.11 | 1.20E-03 | -3.22 | 2.11E-03 | -3.91 | 1.84E-04 |
| <i>Tmie</i>      | 1.25  | 8.09E-07 | 1.40  | 8.76E-07 | 1.76  | 3.32E-08 |
| <i>Tmod4</i>     | 1.50  | 3.73E-04 | 1.35  | 1.90E-03 | 1.73  | 1.04E-04 |
| <i>Tmprss13</i>  | 3.22  | 1.63E-04 | 3.18  | 4.54E-04 | 4.37  | 1.07E-05 |
| <i>Tmtc1</i>     | 2.24  | 1.40E-03 | 1.76  | 1.37E-02 | 2.77  | 2.55E-04 |
| <i>Tmtc4</i>     | 1.24  | 4.97E-06 | 1.55  | 2.16E-06 | 1.66  | 3.13E-07 |
| <i>Tmx4</i>      | -1.05 | 4.08E-07 | -1.14 | 5.94E-07 | -1.06 | 2.70E-07 |
| <i>Tnfaip3</i>   | -3.11 | 2.53E-05 | -4.37 | 3.99E-06 | -4.63 | 6.62E-07 |
| <i>Tnfaip8</i>   | -1.82 | 7.35E-08 | -2.07 | 7.79E-08 | -2.88 | 1.56E-09 |
| <i>Tnfaip8l1</i> | 1.36  | 2.21E-07 | 1.41  | 4.61E-07 | 1.34  | 1.74E-07 |
| <i>Tnfrsf10b</i> | -2.08 | 9.58E-07 | -2.88 | 2.00E-07 | -3.03 | 3.12E-08 |
| <i>Tnfrsf12a</i> | -0.80 | 6.85E-03 | -1.01 | 3.28E-03 | -1.19 | 3.96E-04 |
| <i>Tnfrsf19</i>  | -4.23 | 2.67E-04 | -3.96 | 1.06E-03 | -5.54 | 2.51E-05 |
| <i>Tnfrsf1b</i>  | -2.02 | 1.03E-08 | -2.75 | 5.23E-09 | -2.26 | 2.02E-09 |
| <i>Tnfrsf9</i>   | -1.18 | 2.16E-02 | -1.97 | 1.83E-03 | -2.79 | 4.38E-05 |
| <i>Tnfsf11</i>   | -3.14 | 7.14E-04 | -4.88 | 5.50E-05 | -6.11 | 2.44E-06 |
| <i>Tnfsf4</i>    | -2.09 | 1.86E-04 | -2.68 | 6.16E-05 | -3.83 | 8.70E-07 |
| <i>Tnfsf8</i>    | 3.15  | 2.83E-09 | 3.11  | 7.55E-09 | 1.85  | 3.68E-08 |
| <i>Tnip1</i>     | -1.57 | 1.06E-08 | -1.69 | 1.74E-08 | -1.60 | 3.97E-09 |
| <i>Tnip2</i>     | -1.08 | 1.03E-07 | -1.26 | 9.05E-08 | -1.32 | 1.29E-08 |
| <i>Tnk2</i>      | -2.04 | 2.56E-07 | -2.48 | 1.59E-07 | -2.04 | 1.74E-07 |
| <i>Tnn</i>       | -1.21 | 3.89E-03 | -1.27 | 6.01E-03 | -1.57 | 5.75E-04 |
| <i>Tnni1</i>     | -1.62 | 1.50E-02 | -1.59 | 2.94E-02 | -1.36 | 3.36E-02 |
| <i>Tnnt1</i>     | -1.64 | 1.41E-03 | -1.33 | 1.15E-02 | -1.78 | 6.94E-04 |
| <i>Tnnt3</i>     | 1.09  | 2.90E-04 | 1.21  | 3.20E-04 | 1.46  | 2.28E-05 |
| <i>Tob1</i>      | -1.58 | 6.12E-07 | -1.77 | 6.67E-07 | -1.22 | 4.16E-06 |
| <i>Tob2</i>      | -2.16 | 1.92E-07 | -2.78 | 8.25E-08 | -3.01 | 9.61E-09 |
| <i>Tollip</i>    | -1.34 | 1.52E-07 | -1.35 | 3.65E-07 | -1.43 | 5.66E-08 |

|                  |       |          |       |          |       |          |
|------------------|-------|----------|-------|----------|-------|----------|
| <i>Top1</i>      | -1.46 | 2.05E-07 | -1.73 | 1.56E-07 | -1.80 | 2.52E-08 |
| <i>Top2a</i>     | -1.81 | 6.12E-08 | -1.94 | 9.55E-08 | -2.76 | 1.62E-09 |
| <i>Topors</i>    | -1.03 | 4.21E-06 | -1.15 | 4.50E-06 | -1.17 | 1.09E-06 |
| <i>Tor4a</i>     | 1.19  | 1.30E-08 | 1.21  | 2.86E-08 | 1.46  | 1.39E-09 |
| <i>Tox</i>       | -1.25 | 5.88E-08 | -1.40 | 7.33E-08 | -1.27 | 2.94E-08 |
| <i>Tox2</i>      | -2.23 | 6.27E-04 | -2.22 | 1.50E-03 | -1.26 | 2.25E-02 |
| <i>Tox4</i>      | -1.07 | 1.44E-07 | -1.18 | 1.79E-07 | -1.05 | 1.06E-07 |
| <i>Tpd52l2</i>   | -1.06 | 2.39E-08 | -1.17 | 3.03E-08 | -1.18 | 5.08E-09 |
| <i>Tpgs1</i>     | 1.11  | 2.34E-05 | 0.99  | 1.48E-04 | 1.17  | 1.20E-05 |
| <i>Tpm4</i>      | -1.00 | 4.22E-07 | -1.39 | 1.01E-07 | -2.04 | 1.39E-09 |
| <i>Tpp2</i>      | -1.04 | 1.13E-07 | -0.99 | 3.97E-07 | -1.12 | 3.66E-08 |
| <i>Tppp</i>      | -2.02 | 1.68E-04 | -2.48 | 8.03E-05 | -1.97 | 1.77E-04 |
| <i>Traf3ip3</i>  | 1.05  | 6.88E-08 | 1.14  | 9.97E-08 | 1.51  | 2.80E-09 |
| <i>Traip</i>     | -2.21 | 4.15E-06 | -2.75 | 1.82E-06 | -2.65 | 6.69E-07 |
| <i>Trav8-2</i>   | -0.97 | 2.31E-03 | -1.82 | 4.46E-05 | -1.04 | 1.26E-03 |
| <i>Trex1_1</i>   | -2.01 | 2.55E-03 | -1.38 | 4.17E-02 | -1.69 | 7.35E-03 |
| <i>Trib1</i>     | -2.04 | 4.46E-06 | -2.31 | 4.25E-06 | -3.34 | 5.20E-08 |
| <i>Trib3</i>     | 1.84  | 4.51E-08 | 2.04  | 5.76E-08 | 1.80  | 2.84E-08 |
| <i>Trim13</i>    | -2.64 | 2.27E-04 | -3.63 | 4.49E-05 | -4.28 | 3.29E-06 |
| <i>Trim14</i>    | 1.40  | 9.12E-08 | 1.32  | 3.55E-07 | 1.71  | 1.20E-08 |
| <i>Trim3</i>     | 1.20  | 2.19E-06 | 1.24  | 4.64E-06 | 1.05  | 5.78E-06 |
| <i>Trim34a</i>   | 1.78  | 2.63E-09 | 2.04  | 3.54E-09 | 2.81  | 5.00E-11 |
| <i>Trim36</i>    | -2.00 | 1.23E-05 | -2.74 | 2.45E-06 | -3.61 | 6.35E-08 |
| <i>Trim45</i>    | 1.16  | 1.03E-02 | 1.44  | 5.42E-03 | 1.16  | 9.13E-03 |
| <i>Trim46</i>    | 2.58  | 1.26E-05 | 2.50  | 4.39E-05 | 2.72  | 6.60E-06 |
| <i>Trim47</i>    | 1.57  | 1.28E-03 | 1.39  | 6.20E-03 | 1.94  | 2.34E-04 |
| <i>Trim5</i>     | 1.63  | 4.92E-06 | 1.97  | 2.77E-06 | 2.63  | 6.46E-08 |
| <i>Trim56</i>    | 1.03  | 1.70E-08 | 1.20  | 1.65E-08 | 2.06  | 8.35E-11 |
| <i>Trim68</i>    | 1.47  | 2.06E-07 | 1.48  | 5.17E-07 | 1.93  | 1.55E-08 |
| <i>Triobp</i>    | 0.87  | 7.10E-06 | 1.05  | 3.99E-06 | 1.46  | 6.68E-08 |
| <i>Trip10</i>    | 1.71  | 1.75E-07 | 2.10  | 1.05E-07 | 1.09  | 5.85E-06 |
| <i>Trmt61b</i>   | -1.02 | 4.75E-04 | -1.09 | 6.56E-04 | -1.50 | 1.68E-05 |
| <i>Trnt1</i>     | -1.50 | 1.94E-07 | -1.79 | 1.36E-07 | -1.62 | 6.62E-08 |
| <i>Trp53inp2</i> | -2.65 | 2.65E-05 | -3.71 | 4.31E-06 | -3.96 | 6.72E-07 |
| <i>Trpm4</i>     | 1.38  | 8.46E-08 | 1.27  | 4.20E-07 | 1.49  | 2.74E-08 |
| <i>Tsc22d2</i>   | -1.00 | 5.99E-08 | -1.14 | 6.80E-08 | -1.07 | 2.13E-08 |
| <i>Tshz1</i>     | -1.89 | 1.97E-08 | -2.20 | 1.88E-08 | -2.48 | 1.36E-09 |
| <i>Tspan17</i>   | 1.02  | 2.74E-02 | 2.04  | 7.13E-04 | 1.36  | 4.86E-03 |



|                  |       |          |       |          |       |          |
|------------------|-------|----------|-------|----------|-------|----------|
| <i>Tspan32</i>   | 1.49  | 1.67E-09 | 1.61  | 2.53E-09 | 2.09  | 5.00E-11 |
| <i>Tspan32os</i> | 1.48  | 1.54E-02 | 1.97  | 5.49E-03 | 1.66  | 7.21E-03 |
| <i>Tspan9</i>    | -1.44 | 4.03E-06 | -1.60 | 4.77E-06 | -1.90 | 3.01E-07 |
| <i>Tspyl1</i>    | -1.10 | 2.54E-07 | -1.21 | 3.34E-07 | -1.23 | 7.12E-08 |
| <i>Tsr2</i>      | -1.39 | 1.61E-06 | -1.54 | 1.89E-06 | -1.58 | 4.16E-07 |
| <i>Tssk1</i>     | -1.11 | 3.19E-03 | -0.96 | 1.53E-02 | -1.87 | 5.21E-05 |
| <i>Tssk4</i>     | 1.51  | 1.80E-04 | 1.68  | 1.89E-04 | 2.13  | 8.33E-06 |
| <i>Ttc30a1</i>   | 1.48  | 1.68E-05 | 0.97  | 1.22E-03 | 1.08  | 2.01E-04 |
| <i>Ttc32</i>     | 1.14  | 1.23E-05 | 1.03  | 7.73E-05 | 1.35  | 2.42E-06 |
| <i>Ttf1</i>      | 0.86  | 1.52E-06 | 1.01  | 1.12E-06 | 1.10  | 1.43E-07 |
| <i>Ttyh2</i>     | 1.03  | 2.65E-05 | 0.75  | 7.85E-04 | 1.42  | 1.33E-06 |
| <i>Ttyh3</i>     | 1.14  | 4.70E-09 | 0.96  | 2.83E-08 | 1.42  | 3.97E-10 |
| <i>Tubb2a</i>    | -1.63 | 2.93E-06 | -2.08 | 1.04E-06 | -1.43 | 7.09E-06 |
| <i>Tulp3</i>     | 1.67  | 2.89E-08 | 1.73  | 5.62E-08 | 1.39  | 6.04E-08 |
| <i>Twistnb</i>   | -1.31 | 4.78E-07 | -1.34 | 1.08E-06 | -1.49 | 1.14E-07 |
| <i>Twsg1</i>     | -1.51 | 6.09E-08 | -1.65 | 8.40E-08 | -1.79 | 9.74E-09 |
| <i>Txndc12</i>   | 0.99  | 9.59E-07 | 1.13  | 9.62E-07 | 1.11  | 2.73E-07 |
| <i>Uba6</i>      | -0.99 | 9.24E-06 | -1.03 | 1.83E-05 | -1.21 | 1.26E-06 |
| <i>Ubald2</i>    | -1.22 | 7.31E-07 | -1.51 | 3.67E-07 | -1.39 | 1.77E-07 |
| <i>Ubb</i>       | -1.18 | 2.43E-08 | -1.22 | 4.77E-08 | -1.14 | 1.51E-08 |
| <i>Ubc</i>       | -1.63 | 9.51E-08 | -1.83 | 1.05E-07 | -1.77 | 2.90E-08 |
| <i>Ube2b</i>     | -1.45 | 2.57E-07 | -1.48 | 5.89E-07 | -1.62 | 7.11E-08 |
| <i>Ube2e3</i>    | -1.32 | 2.04E-07 | -1.43 | 2.96E-07 | -1.68 | 1.94E-08 |
| <i>Ube2j1</i>    | -1.16 | 1.21E-07 | -1.31 | 1.28E-07 | -1.33 | 2.52E-08 |
| <i>Ube2s</i>     | -1.95 | 4.66E-06 | -2.17 | 5.13E-06 | -2.41 | 5.78E-07 |
| <i>Ublcp1</i>    | -1.00 | 2.48E-05 | -1.32 | 6.79E-06 | -1.14 | 6.68E-06 |
| <i>Ubn1</i>      | -1.37 | 1.71E-08 | -1.52 | 2.19E-08 | -1.45 | 5.22E-09 |
| <i>Ubtcl1</i>    | 0.90  | 2.33E-05 | 1.13  | 9.61E-06 | 1.15  | 2.35E-06 |
| <i>Ubxn2a</i>    | -1.00 | 8.55E-08 | -1.06 | 1.46E-07 | -1.07 | 2.91E-08 |
| <i>Ubxn2b</i>    | 1.42  | 6.30E-07 | 1.53  | 9.41E-07 | 1.69  | 1.01E-07 |
| <i>Ubxn8</i>     | -1.14 | 2.56E-06 | -1.14 | 7.20E-06 | -1.07 | 3.72E-06 |
| <i>Uckl1</i>     | 1.28  | 1.05E-07 | 1.34  | 1.88E-07 | 1.46  | 2.26E-08 |
| <i>Ufsp2</i>     | 1.24  | 1.59E-08 | 1.32  | 2.71E-08 | 1.36  | 3.73E-09 |
| <i>Ulk1</i>      | -1.79 | 2.55E-08 | -2.09 | 2.38E-08 | -2.12 | 3.73E-09 |
| <i>Unc45a</i>    | -0.94 | 2.93E-08 | -1.10 | 2.58E-08 | -1.21 | 2.33E-09 |
| <i>Unc5b</i>     | -1.42 | 4.75E-02 | -2.29 | 7.24E-03 | -1.86 | 1.15E-02 |
| <i>Urb2</i>      | -1.17 | 1.57E-04 | -1.52 | 4.75E-05 | -1.76 | 4.10E-06 |
| <i>Uros</i>      | 1.16  | 7.32E-07 | 1.12  | 2.71E-06 | 1.49  | 6.71E-08 |

|                |       |          |       |          |       |          |
|----------------|-------|----------|-------|----------|-------|----------|
| <i>Usp10</i>   | -1.04 | 6.17E-07 | -0.94 | 3.79E-06 | -1.06 | 3.93E-07 |
| <i>Usp12</i>   | -1.70 | 8.52E-08 | -1.94 | 8.77E-08 | -1.97 | 1.61E-08 |
| <i>Usp16</i>   | -1.23 | 6.18E-08 | -1.40 | 6.52E-08 | -1.37 | 1.51E-08 |
| <i>Usp18</i>   | 1.00  | 6.38E-05 | 1.20  | 3.87E-05 | 2.56  | 1.91E-08 |
| <i>Usp2</i>    | -2.13 | 3.71E-05 | -2.77 | 1.08E-05 | -3.26 | 7.60E-07 |
| <i>Usp21</i>   | 0.98  | 1.36E-07 | 1.00  | 2.97E-07 | 1.05  | 4.77E-08 |
| <i>Usp22</i>   | -1.12 | 9.56E-08 | -1.29 | 9.18E-08 | -1.65 | 3.23E-09 |
| <i>Usp28</i>   | 1.48  | 7.90E-10 | 1.41  | 2.30E-09 | 1.75  | 6.41E-11 |
| <i>Usp35</i>   | 1.14  | 1.44E-06 | 1.17  | 3.11E-06 | 1.44  | 1.45E-07 |
| <i>Usp36</i>   | -1.12 | 1.03E-08 | -1.30 | 1.05E-08 | -1.58 | 4.66E-10 |
| <i>Usp38</i>   | -1.64 | 1.96E-07 | -1.85 | 2.01E-07 | -1.37 | 5.94E-07 |
| <i>Usp54</i>   | -1.81 | 6.61E-08 | -1.82 | 1.65E-07 | -2.20 | 9.08E-09 |
| <i>Usp6nl</i>  | -1.07 | 1.30E-07 | -1.16 | 1.80E-07 | -1.31 | 1.61E-08 |
| <i>Usp9x</i>   | -0.99 | 7.99E-08 | -1.00 | 1.80E-07 | -1.03 | 3.34E-08 |
| <i>Utp14b</i>  | -3.28 | 9.32E-05 | -3.19 | 2.97E-04 | -3.33 | 7.20E-05 |
| <i>Vamp5</i>   | 1.09  | 6.67E-06 | 0.93  | 6.84E-05 | 1.13  | 3.89E-06 |
| <i>Vat1</i>    | 1.76  | 2.33E-08 | 1.87  | 3.90E-08 | 1.47  | 4.37E-08 |
| <i>Vcl</i>     | -2.23 | 5.14E-07 | -2.95 | 1.61E-07 | -3.52 | 9.63E-09 |
| <i>Vdr</i>     | -2.49 | 2.60E-05 | -3.07 | 1.23E-05 | -4.12 | 2.80E-07 |
| <i>Vegfa</i>   | -2.46 | 3.60E-07 | -3.36 | 9.52E-08 | -3.73 | 9.35E-09 |
| <i>Vegfb</i>   | 1.70  | 1.74E-06 | 2.06  | 9.96E-07 | 1.52  | 3.61E-06 |
| <i>Vgll4</i>   | -1.94 | 5.57E-08 | -2.39 | 3.80E-08 | -2.12 | 1.63E-08 |
| <i>Vmac</i>    | 1.12  | 3.45E-07 | 1.42  | 1.56E-07 | 1.23  | 1.11E-07 |
| <i>Vmn2r96</i> | 1.17  | 2.22E-06 | 1.57  | 5.54E-07 | 1.86  | 3.45E-08 |
| <i>Vmn2r97</i> | 3.17  | 1.64E-05 | 2.87  | 9.98E-05 | 4.32  | 9.32E-07 |
| <i>Vopp1</i>   | -1.13 | 4.13E-07 | -1.14 | 1.05E-06 | -1.04 | 5.72E-07 |
| <i>Vpreb1</i>  | 2.59  | 5.13E-04 | 2.47  | 1.69E-03 | 3.21  | 8.07E-05 |
| <i>Vps18</i>   | -0.84 | 2.06E-06 | -1.08 | 7.35E-07 | -1.03 | 2.87E-07 |
| <i>Vps37b</i>  | -2.45 | 3.60E-07 | -3.02 | 1.88E-07 | -3.62 | 1.11E-08 |
| <i>Vwa5a</i>   | 1.36  | 5.53E-06 | 1.34  | 1.68E-05 | 1.59  | 1.09E-06 |
| <i>Wac</i>     | -1.22 | 1.56E-06 | -1.37 | 1.66E-06 | -1.30 | 7.09E-07 |
| <i>Wars</i>    | 0.85  | 1.41E-06 | 1.13  | 3.94E-07 | 4.27  | 1.24E-11 |
| <i>Wbp5</i>    | -1.35 | 1.88E-07 | -1.53 | 1.96E-07 | -1.91 | 8.73E-09 |
| <i>Wbscr16</i> | -1.08 | 6.18E-08 | -1.17 | 9.19E-08 | -1.09 | 3.48E-08 |
| <i>Wbscr27</i> | 2.50  | 1.40E-08 | 2.33  | 5.03E-08 | 2.45  | 7.01E-09 |
| <i>Wdhd1</i>   | -0.89 | 1.84E-06 | -1.06 | 1.18E-06 | -1.19 | 1.21E-07 |
| <i>Wdr38</i>   | 1.43  | 2.23E-03 | 1.10  | 2.11E-02 | 1.20  | 6.21E-03 |
| <i>Wdr45b</i>  | -1.25 | 3.01E-08 | -1.38 | 4.04E-08 | -1.38 | 7.34E-09 |

|                |       |          |       |          |       |          |
|----------------|-------|----------|-------|----------|-------|----------|
| <i>Wdr89</i>   | 1.23  | 1.17E-05 | 1.56  | 4.21E-06 | 1.36  | 3.91E-06 |
| <i>Wdsub1</i>  | 1.44  | 6.77E-09 | 1.35  | 2.34E-08 | 1.15  | 1.27E-08 |
| <i>Wdyhvl</i>  | -1.18 | 5.76E-07 | -1.35 | 5.32E-07 | -1.31 | 1.63E-07 |
| <i>Whsc11l</i> | 1.57  | 2.12E-09 | 1.71  | 3.50E-09 | 1.03  | 8.89E-09 |
| <i>Wnk3</i>    | 1.61  | 2.62E-03 | 1.88  | 1.97E-03 | 1.39  | 6.36E-03 |
| <i>Wnt2b</i>   | 1.01  | 3.33E-03 | 0.97  | 8.61E-03 | 1.46  | 1.97E-04 |
| <i>Wsb1</i>    | -1.14 | 1.99E-07 | -1.28 | 2.09E-07 | -1.27 | 5.19E-08 |
| <i>Wwp1</i>    | -1.23 | 1.92E-07 | -1.05 | 1.77E-06 | -1.30 | 8.05E-08 |
| <i>Xbp1</i>    | -1.64 | 5.30E-07 | -1.97 | 3.36E-07 | -2.86 | 4.84E-09 |
| <i>Xcr1</i>    | -1.86 | 9.41E-03 | -2.17 | 7.51E-03 | -1.47 | 3.11E-02 |
| <i>Xkr8</i>    | 1.52  | 1.38E-07 | 1.37  | 8.45E-07 | 1.60  | 5.66E-08 |
| <i>Xrcc2</i>   | -1.47 | 2.88E-06 | -1.94 | 8.23E-07 | -1.91 | 2.37E-07 |
| <i>Xylt2</i>   | 1.03  | 2.82E-08 | 1.10  | 4.43E-08 | 1.25  | 3.33E-09 |
| <i>Yap1</i>    | -3.10 | 1.36E-03 | -2.77 | 6.12E-03 | -3.14 | 1.11E-03 |
| <i>Yes1</i>    | -1.65 | 1.54E-06 | -1.97 | 9.89E-07 | -2.39 | 5.12E-08 |
| <i>Ypel2</i>   | -1.24 | 1.55E-07 | -1.44 | 1.33E-07 | -1.53 | 1.84E-08 |
| <i>Ypel4</i>   | -3.65 | 1.05E-04 | -4.32 | 6.80E-05 | -4.19 | 2.82E-05 |
| <i>Ythdc1</i>  | -1.13 | 4.80E-07 | -1.13 | 1.26E-06 | -1.10 | 4.31E-07 |
| <i>Ythdc2</i>  | -1.20 | 5.13E-07 | -1.30 | 7.20E-07 | -1.21 | 3.31E-07 |
| <i>Zbed3</i>   | -1.60 | 1.62E-03 | -1.68 | 2.57E-03 | -2.20 | 1.27E-04 |
| <i>Zbed5</i>   | -1.62 | 1.18E-04 | -1.79 | 1.32E-04 | -2.93 | 6.04E-07 |
| <i>Zbtb10</i>  | -2.40 | 4.33E-07 | -3.04 | 1.84E-07 | -3.15 | 3.20E-08 |
| <i>Zbtb11</i>  | -1.17 | 3.04E-07 | -1.21 | 6.15E-07 | -1.13 | 2.68E-07 |
| <i>Zbtb14</i>  | 0.83  | 2.27E-08 | 1.15  | 8.39E-09 | 1.50  | 2.18E-10 |
| <i>Zbtb21</i>  | -1.79 | 4.87E-08 | -2.18 | 3.44E-08 | -1.91 | 1.63E-08 |
| <i>Zbtb37</i>  | 1.48  | 1.02E-08 | 1.71  | 1.02E-08 | 1.84  | 9.34E-10 |
| <i>Zbtb38</i>  | -1.53 | 4.38E-07 | -1.82 | 3.00E-07 | -1.42 | 5.85E-07 |
| <i>Zbtb42</i>  | 1.16  | 7.86E-07 | 1.19  | 1.78E-06 | 1.56  | 4.74E-08 |
| <i>Zbtb7b</i>  | 2.15  | 8.05E-10 | 2.18  | 1.73E-09 | 2.36  | 9.44E-11 |
| <i>Zbtb8a</i>  | 1.41  | 1.09E-06 | 1.64  | 8.72E-07 | 1.75  | 1.30E-07 |
| <i>Zc2hc1c</i> | -1.61 | 4.14E-04 | -1.81 | 3.98E-04 | -2.36 | 1.49E-05 |
| <i>Zc3h12a</i> | -1.86 | 6.55E-08 | -2.24 | 4.80E-08 | -2.37 | 6.44E-09 |
| <i>Zc3h13</i>  | -1.25 | 6.02E-08 | -1.40 | 7.33E-08 | -1.35 | 1.88E-08 |
| <i>Zc3hc1</i>  | -1.38 | 5.55E-09 | -1.62 | 5.57E-09 | -1.68 | 4.92E-10 |
| <i>Zcchc11</i> | -1.36 | 2.27E-08 | -1.37 | 5.03E-08 | -1.06 | 7.45E-08 |
| <i>Zcchc12</i> | -2.15 | 8.69E-04 | -2.00 | 3.17E-03 | -3.07 | 4.37E-05 |
| <i>Zdhhc12</i> | 0.82  | 1.32E-03 | 1.02  | 6.30E-04 | 1.16  | 7.93E-05 |
| <i>Zdhhc23</i> | -1.34 | 4.62E-06 | -1.18 | 3.78E-05 | -2.29 | 3.95E-08 |

|                |       |          |       |          |       |          |
|----------------|-------|----------|-------|----------|-------|----------|
| <i>Zdhhc5</i>  | -1.03 | 7.99E-08 | -1.09 | 1.33E-07 | -1.20 | 1.44E-08 |
| <i>Zfand2a</i> | -2.45 | 2.98E-06 | -3.09 | 1.21E-06 | -3.61 | 8.40E-08 |
| <i>Zfp109</i>  | 1.35  | 1.58E-05 | 1.46  | 2.13E-05 | 1.61  | 2.72E-06 |
| <i>Zfp128</i>  | 1.90  | 1.70E-06 | 2.00  | 3.10E-06 | 2.29  | 2.60E-07 |
| <i>Zfp14</i>   | 1.36  | 3.04E-06 | 1.83  | 7.15E-07 | 2.03  | 7.84E-08 |
| <i>Zfp174</i>  | 1.38  | 7.41E-07 | 1.41  | 1.69E-06 | 2.18  | 1.32E-08 |
| <i>Zfp2</i>    | 1.17  | 1.13E-04 | 1.48  | 4.29E-05 | 1.53  | 1.02E-05 |
| <i>Zfp217</i>  | 1.07  | 3.19E-08 | 1.15  | 4.72E-08 | 1.49  | 1.51E-09 |
| <i>Zfp219</i>  | 1.19  | 9.96E-07 | 1.07  | 6.57E-06 | 1.09  | 1.60E-06 |
| <i>Zfp239</i>  | 1.17  | 6.35E-04 | 1.32  | 6.18E-04 | 1.00  | 1.80E-03 |
| <i>Zfp28</i>   | 1.54  | 3.66E-08 | 1.39  | 1.78E-07 | 1.52  | 2.04E-08 |
| <i>Zfp286</i>  | 2.00  | 2.25E-06 | 1.66  | 3.04E-05 | 2.32  | 4.87E-07 |
| <i>Zfp287</i>  | 1.43  | 2.30E-08 | 1.33  | 8.89E-08 | 1.92  | 1.39E-09 |
| <i>Zfp3</i>    | 1.93  | 2.36E-08 | 1.61  | 1.89E-07 | 2.25  | 3.73E-09 |
| <i>Zfp316</i>  | 1.64  | 4.39E-07 | 1.42  | 3.85E-06 | 1.60  | 3.87E-07 |
| <i>Zfp322a</i> | 1.07  | 1.90E-02 | 1.38  | 8.45E-03 | 1.07  | 1.77E-02 |
| <i>Zfp329</i>  | 1.40  | 8.03E-09 | 1.64  | 8.66E-09 | 1.64  | 1.10E-09 |
| <i>Zfp358</i>  | 1.26  | 2.46E-06 | 1.29  | 5.51E-06 | 1.19  | 3.11E-06 |
| <i>Zfp41</i>   | 1.99  | 4.57E-08 | 1.87  | 1.76E-07 | 2.05  | 1.96E-08 |
| <i>Zfp410</i>  | -1.00 | 6.19E-08 | -1.03 | 1.31E-07 | -1.18 | 1.03E-08 |
| <i>Zfp420</i>  | 1.40  | 7.94E-09 | 1.57  | 9.75E-09 | 1.45  | 2.37E-09 |
| <i>Zfp426</i>  | 1.07  | 3.26E-04 | 1.36  | 1.19E-04 | 1.14  | 1.76E-04 |
| <i>Zfp444</i>  | 1.63  | 8.84E-08 | 1.64  | 2.17E-07 | 1.74  | 3.20E-08 |
| <i>Zfp446</i>  | 1.04  | 2.21E-05 | 1.33  | 7.27E-06 | 1.31  | 2.41E-06 |
| <i>Zfp449</i>  | -1.33 | 7.45E-03 | -1.81 | 2.18E-03 | -1.81 | 8.45E-04 |
| <i>Zfp455</i>  | 0.76  | 2.27E-05 | 1.14  | 1.99E-06 | 1.04  | 1.15E-06 |
| <i>Zfp459</i>  | 0.73  | 3.38E-04 | 1.18  | 1.78E-05 | 1.09  | 1.10E-05 |
| <i>Zfp467</i>  | 1.49  | 2.90E-07 | 1.70  | 2.80E-07 | 1.60  | 1.06E-07 |
| <i>Zfp493</i>  | 1.77  | 3.68E-08 | 1.76  | 9.31E-08 | 1.95  | 9.35E-09 |
| <i>Zfp52</i>   | -1.21 | 5.24E-07 | -1.08 | 3.92E-06 | -1.43 | 9.71E-08 |
| <i>Zfp560</i>  | 0.94  | 3.03E-05 | 1.13  | 1.80E-05 | 1.61  | 2.46E-07 |
| <i>Zfp563</i>  | 1.19  | 7.03E-06 | 1.19  | 1.80E-05 | 1.16  | 7.15E-06 |
| <i>Zfp579</i>  | 1.36  | 3.11E-07 | 1.20  | 2.29E-06 | 1.28  | 3.56E-07 |
| <i>Zfp583</i>  | 1.96  | 2.03E-03 | 3.30  | 9.24E-05 | 1.82  | 3.07E-03 |
| <i>Zfp606</i>  | 1.27  | 8.43E-07 | 1.32  | 1.76E-06 | 1.48  | 1.70E-07 |
| <i>Zfp619</i>  | -0.86 | 8.86E-05 | -1.03 | 5.33E-05 | -1.00 | 2.09E-05 |
| <i>Zfp647</i>  | 2.68  | 2.59E-06 | 1.80  | 1.91E-04 | 2.60  | 2.67E-06 |
| <i>Zfp655</i>  | -1.01 | 6.43E-07 | -1.07 | 1.09E-06 | -1.13 | 1.70E-07 |

|                |       |          |       |          |       |          |
|----------------|-------|----------|-------|----------|-------|----------|
| <i>Zfp661</i>  | 1.18  | 1.48E-07 | 1.14  | 5.07E-07 | 1.26  | 5.60E-08 |
| <i>Zfp688</i>  | 0.86  | 2.34E-04 | 1.03  | 1.41E-04 | 1.21  | 1.17E-05 |
| <i>Zfp7</i>    | 1.85  | 7.87E-08 | 2.03  | 1.05E-07 | 1.61  | 1.46E-07 |
| <i>Zfp703</i>  | -1.02 | 9.23E-07 | -1.10 | 1.41E-06 | -1.27 | 1.12E-07 |
| <i>Zfp704</i>  | 1.44  | 3.21E-03 | 1.27  | 1.39E-02 | 2.45  | 4.65E-05 |
| <i>Zfp72</i>   | 2.24  | 1.93E-04 | 2.82  | 7.44E-05 | 2.75  | 3.01E-05 |
| <i>Zfp759</i>  | 1.43  | 6.67E-06 | 1.63  | 5.85E-06 | 2.01  | 2.80E-07 |
| <i>Zfp760</i>  | 1.91  | 1.22E-06 | 2.33  | 6.72E-07 | 1.91  | 9.45E-07 |
| <i>Zfp768</i>  | 2.37  | 3.63E-05 | 1.24  | 9.97E-03 | 2.39  | 2.86E-05 |
| <i>Zfp773</i>  | 1.23  | 5.21E-06 | 1.16  | 2.45E-05 | 1.55  | 5.74E-07 |
| <i>Zfp775</i>  | 0.92  | 1.55E-06 | 1.05  | 1.40E-06 | 1.03  | 4.61E-07 |
| <i>Zfp78</i>   | 1.53  | 3.07E-04 | 1.92  | 1.27E-04 | 1.75  | 9.23E-05 |
| <i>Zfp781</i>  | -1.29 | 2.87E-03 | -1.33 | 5.06E-03 | -1.20 | 4.25E-03 |
| <i>Zfp800</i>  | -1.36 | 3.07E-07 | -1.55 | 2.97E-07 | -1.51 | 8.68E-08 |
| <i>Zfp808</i>  | 1.19  | 3.15E-06 | 1.37  | 2.60E-06 | 1.34  | 8.96E-07 |
| <i>Zfp82</i>   | 1.67  | 3.53E-03 | 1.57  | 1.03E-02 | 2.19  | 4.49E-04 |
| <i>Zfp825</i>  | 1.22  | 2.86E-06 | 1.26  | 5.81E-06 | 1.48  | 4.16E-07 |
| <i>Zfp839</i>  | 1.04  | 7.53E-05 | 1.26  | 3.92E-05 | 1.50  | 2.74E-06 |
| <i>Zfp85os</i> | 1.04  | 5.21E-03 | 0.97  | 1.52E-02 | 1.27  | 1.19E-03 |
| <i>Zfp873</i>  | 1.37  | 7.46E-07 | 1.52  | 8.83E-07 | 1.44  | 3.42E-07 |
| <i>Zfp882</i>  | 1.80  | 7.18E-04 | 1.37  | 9.60E-03 | 1.96  | 3.25E-04 |
| <i>Zfp93</i>   | 1.24  | 7.13E-03 | 1.41  | 6.59E-03 | 1.52  | 1.72E-03 |
| <i>Zfp935</i>  | 1.03  | 3.17E-07 | 0.94  | 1.92E-06 | 1.28  | 3.92E-08 |
| <i>Zfp94</i>   | 1.57  | 5.59E-05 | 1.73  | 6.57E-05 | 1.92  | 8.50E-06 |
| <i>Zfpm1</i>   | -1.71 | 4.22E-07 | -2.16 | 1.86E-07 | -2.45 | 1.59E-08 |
| <i>Zfyve21</i> | 1.10  | 6.56E-05 | 1.17  | 9.95E-05 | 1.16  | 3.41E-05 |
| <i>Zfyve28</i> | -2.23 | 6.19E-04 | -3.05 | 1.33E-04 | -2.59 | 1.70E-04 |
| <i>Zgrf1</i>   | -1.58 | 1.45E-05 | -1.96 | 6.35E-06 | -1.74 | 5.15E-06 |
| <i>Zhx1</i>    | -1.44 | 3.00E-04 | -1.31 | 1.44E-03 | -1.90 | 2.57E-05 |
| <i>Zkscan3</i> | 1.60  | 1.54E-08 | 1.82  | 1.74E-08 | 1.76  | 3.48E-09 |
| <i>Zkscan7</i> | 1.45  | 9.71E-03 | 2.10  | 1.88E-03 | 1.97  | 1.21E-03 |
| <i>Zkscan8</i> | 2.06  | 7.74E-08 | 2.13  | 1.53E-07 | 2.48  | 1.10E-08 |
| <i>Zmiz1</i>   | -1.58 | 2.72E-08 | -1.81 | 2.90E-08 | -2.08 | 1.96E-09 |
| <i>Zmym1</i>   | -1.57 | 1.14E-06 | -1.69 | 1.78E-06 | -1.78 | 2.99E-07 |
| <i>Zmynd10</i> | 1.59  | 1.47E-04 | 1.79  | 1.41E-04 | 1.38  | 3.83E-04 |
| <i>Znrd1as</i> | 1.71  | 6.06E-04 | 1.90  | 6.44E-04 | 2.50  | 2.33E-05 |
| <i>Zpr1</i>    | -0.90 | 4.75E-09 | -1.02 | 5.90E-09 | -1.18 | 2.93E-10 |
| <i>Zranb1</i>  | -2.02 | 1.15E-04 | -2.04 | 2.66E-04 | -2.35 | 2.70E-05 |

|                |       |          |       |          |       |          |
|----------------|-------|----------|-------|----------|-------|----------|
| <i>Zscan12</i> | 1.38  | 1.68E-06 | 1.69  | 8.69E-07 | 1.16  | 6.16E-06 |
| <i>Zscan22</i> | 1.00  | 1.96E-07 | 1.02  | 4.50E-07 | 1.32  | 1.48E-08 |
| <i>Zswim4</i>  | -1.27 | 6.21E-08 | -1.58 | 3.92E-08 | -1.46 | 1.26E-08 |
| <i>Zswim6</i>  | -1.88 | 1.99E-08 | -1.93 | 4.19E-08 | -2.05 | 5.02E-09 |
| <i>Zwilch</i>  | -1.60 | 1.01E-06 | -1.78 | 1.17E-06 | -1.19 | 9.73E-06 |

Lists of DEGs, their  $\log_2(\text{FC})$  and adjusted  $p$  values generated for each condition were compared using Venn diagrams to obtain the list of overlapping genes between IL-7 and IFN- $\gamma$  overnight stimulation in both WT and STAT1 Tg CD4 T cells. \* Fold changes (FC) were calculated relative to unstimulated condition for each sample.

**Table S8. Categories of diseases and biological functions predicted to be affected by IPA within DEGs****in WT and STAT1 Tg CD4 Naive T cells stimulated with IL-7**

| Categories                                           | Diseases or functions annotation                 | P-value <sup>★</sup> | Predicted activation state | Activation on z-score <sup>€</sup> | # Mol <sup>§§</sup> |
|------------------------------------------------------|--------------------------------------------------|----------------------|----------------------------|------------------------------------|---------------------|
| <b>WT cells stimulated with IL-7 (90')</b>           |                                                  |                      |                            |                                    |                     |
| <i>Cellular Growth and Proliferation</i>             | generation of cells                              | 1.26E-12             | Increased                  | 3.472                              | 134                 |
| <i>Cellular Growth and Proliferation</i>             | proliferation of cells                           | 3.16E-16             | Increased                  | 3.22                               | 221                 |
| <i>Hematological System Development and Function</i> | development of blood cells                       | 6.08E-20             | Increased                  | 3.115                              | 79                  |
| <i>Cellular Growth and Proliferation</i>             | proliferation of epithelial cells                | 3.22E-10             | Increased                  | 3.046                              | 46                  |
| <i>Cell Death and Survival</i>                       | cell survival                                    | 5.35E-10             | Increased                  | 3.022                              | 95                  |
| <i>Hematological System Development and Function</i> | development of leukocytes                        | 3.85E-22             | Increased                  | 2.993                              | 77                  |
| <i>Cellular Growth and Proliferation</i>             | proliferation of blood cells                     | 1.15E-20             | Increased                  | 2.952                              | 89                  |
| <i>Cell-To-Cell Signaling and Interaction</i>        | activation of T lymphocytes                      | 1.08E-10             | Increased                  | 2.912                              | 38                  |
| <i>Gene Expression</i>                               | transactivation of RNA                           | 1.20E-09             | Increased                  | 2.759                              | 48                  |
| <i>Cellular Growth and Proliferation</i>             | proliferation of lymphocytes                     | 4.87E-21             | Increased                  | 2.72                               | 82                  |
| <i>Hematological System Development and Function</i> | development of lymphocytes                       | 1.02E-22             | Increased                  | 2.696                              | 74                  |
| <i>Organismal Injury and Abnormalities</i>           | malignant solid tumor                            | 5.68E-14             | Increased                  | 2.62                               | 488                 |
| <i>Cellular Growth and Proliferation</i>             | proliferation of mononuclear leukocytes          | 3.06E-21             | Increased                  | 2.617                              | 83                  |
| <i>Cellular Growth and Proliferation</i>             | proliferation of immune cells                    | 8.76E-20             | Increased                  | 2.61                               | 84                  |
| <i>Cell Death and Survival</i>                       | cell viability                                   | 3.55E-09             | Increased                  | 2.551                              | 88                  |
| <i>Hematological System Development and Function</i> | quantity of thymus gland                         | 1.74E-13             | Increased                  | 2.548                              | 33                  |
| <i>Cellular Function and Maintenance</i>             | homeostasis of leukocytes                        | 1.49E-21             | Increased                  | 2.496                              | 72                  |
| <i>Cellular Function and Maintenance</i>             | Lymphocyte homeostasis                           | 2.27E-21             | Increased                  | 2.489                              | 71                  |
| <i>Cell-To-Cell Signaling and Interaction</i>        | activation of cells                              | 3.07E-17             | Increased                  | 2.486                              | 90                  |
| <i>Cell Death and Survival</i>                       | cell viability of leukocytes                     | 2.25E-13             | Increased                  | 2.478                              | 35                  |
| <i>Cell-To-Cell Signaling and Interaction</i>        | activation of lymphocytes                        | 2.24E-15             | Increased                  | 2.471                              | 53                  |
| <i>Gene Expression</i>                               | transactivation                                  | 3.70E-09             | Increased                  | 2.465                              | 49                  |
| <i>Cellular Growth and Proliferation</i>             | cell proliferation of T lymphocytes              | 6.18E-19             | Increased                  | 2.447                              | 69                  |
| <i>Organismal Injury and Abnormalities</i>           | lymphatic node tumor                             | 8.60E-09             | Increased                  | 2.424                              | 49                  |
| <i>Organismal Injury and Abnormalities</i>           | neoplasia of tumor cell lines                    | 4.82E-06             | Increased                  | 2.424                              | 27                  |
| <i>Cell Death and Survival</i>                       | cell viability of lymphocytes                    | 1.28E-11             | Increased                  | 2.388                              | 27                  |
| <i>Cellular Growth and Proliferation</i>             | proliferation of B lymphocytes                   | 9.47E-11             | Increased                  | 2.383                              | 34                  |
| <i>Cellular Growth and Proliferation</i>             | cell proliferation of leukocyte cell lines       | 2.76E-12             | Increased                  | 2.376                              | 29                  |
| <i>Cell Death and Survival</i>                       | cell death of cervical cancer cell lines         | 5.59E-08             | Increased                  | 2.37                               | 33                  |
| <i>Organismal Injury and Abnormalities</i>           | progression of tumor                             | 4.40E-08             | Increased                  | 2.36                               | 20                  |
| <i>Cellular Growth and Proliferation</i>             | proliferation of B-lymphocyte derived cell lines | 2.61E-07             | Increased                  | 2.352                              | 16                  |
| <i>Cellular Growth and Proliferation</i>             | proliferation of hematopoietic cells             | 4.97E-08             | Increased                  | 2.316                              | 27                  |
| <i>Hematological System Development and Function</i> | T cell development                               | 2.66E-21             | Increased                  | 2.316                              | 68                  |
| <i>Hematological System Development and Function</i> | T cell homeostasis                               | 2.24E-21             | Increased                  | 2.304                              | 69                  |
| <i>Hematological System Development and Function</i> | quantity of thymocytes                           | 3.77E-12             | Increased                  | 2.275                              | 31                  |
| <i>Hematological System Development and Function</i> | quantity of bone marrow cells                    | 5.93E-07             | Increased                  | 2.272                              | 19                  |
| <i>Organismal Injury and Abnormalities</i>           | non-Hodgkin's disease                            | 1.09E-08             | Increased                  | 2.242                              | 47                  |

|                                                      |                                         |          |           |        |     |
|------------------------------------------------------|-----------------------------------------|----------|-----------|--------|-----|
| <i>Post-Translational Modification</i>               | phosphorylation of protein              | 2.06E-09 | Increased | 2.229  | 57  |
| <i>Cell Death and Survival</i>                       | apoptosis of cervical cancer cell lines | 1.42E-06 | Increased | 2.227  | 26  |
| <i>Cell Cycle</i>                                    | S phase                                 | 1.97E-07 | Increased | 2.218  | 26  |
| <i>Cell Death and Survival</i>                       | cell viability of T lymphocytes         | 6.79E-13 | Increased | 2.207  | 22  |
| <i>Organismal Injury and Abnormalities</i>           | advanced neoplasia                      | 3.61E-12 | Increased | 2.205  | 74  |
| <i>Organismal Injury and Abnormalities</i>           | advanced malignant tumor                | 9.42E-12 | Increased | 2.205  | 73  |
| <i>Organismal Injury and Abnormalities</i>           | metastasis                              | 3.00E-11 | Increased | 2.205  | 67  |
| <i>Organismal Injury and Abnormalities</i>           | fibrosarcoma                            | 4.75E-06 | Increased | 2.194  | 9   |
| <i>Organismal Injury and Abnormalities</i>           | cancer                                  | 1.40E-13 | Increased | 2.193  | 491 |
| <i>Organismal Injury and Abnormalities</i>           | neoplasia of lymphoid organ             | 1.79E-08 | Increased | 2.176  | 50  |
| <i>Cellular Growth and Proliferation</i>             | cell proliferation of tumor cell lines  | 2.11E-11 | Increased | 2.144  | 107 |
| <i>Gene Expression</i>                               | activation of DNA endogenous promoter   | 8.56E-07 | Increased | 2.134  | 75  |
| <i>Hematological System Development and Function</i> | quantity of regulatory T lymphocytes    | 5.61E-07 | Increased | 2.104  | 15  |
| <i>Cancer</i>                                        | cell transformation                     | 2.20E-07 | Increased | 2.033  | 38  |
| <i>Cell Death and Survival</i>                       | cell death                              | 2.61E-16 | Increased | 2.016  | 205 |
| <i>Cell-To-Cell Signaling and Interaction</i>        | binding of cells                        | 9.52E-11 | Increased | 2.005  | 46  |
| <i>Hematological System Development and Function</i> | quantity of neutrophils                 | 8.69E-06 | Decreased | -2.188 | 21  |
| <i>Hematological System Development and Function</i> | quantity of granulocytes                | 3.14E-07 | Decreased | -2.259 | 29  |
| <i>Infectious Diseases</i>                           | infection of mammalia                   | 1.10E-12 | Decreased | -2.429 | 40  |
| <i>Infectious Diseases</i>                           | Bacterial Infections                    | 6.36E-08 | Decreased | -2.54  | 36  |
| <i>Organismal Survival</i>                           | organismal death                        | 4.57E-09 | Decreased | -2.878 | 139 |
| <i>Organismal Survival</i>                           | morbidity or mortality                  | 2.47E-10 | Decreased | -2.94  | 145 |

**STAT1 Tg cells stimulated with IL-7 (90')**

|                                                      |                                          |          |           |       |     |
|------------------------------------------------------|------------------------------------------|----------|-----------|-------|-----|
| <i>Cellular Growth and Proliferation</i>             | generation of cells                      | 1.77E-12 | Increased | 3.176 | 133 |
| <i>Cellular Growth and Proliferation</i>             | formation of osteoclasts                 | 2.14E-06 | Increased | 2.707 | 15  |
| <i>Cell Death and Survival</i>                       | cell viability of mononuclear leukocytes | 6.46E-12 | Increased | 2.66  | 28  |
| <i>Hematological System Development and Function</i> | development of blood cells               | 2.24E-18 | Increased | 2.64  | 76  |
| <i>Gene Expression</i>                               | transactivation of RNA                   | 8.51E-09 | Increased | 2.6   | 46  |
| <i>Cell Death and Survival</i>                       | cell survival                            | 1.86E-09 | Increased | 2.542 | 93  |
| <i>Hematological System Development and Function</i> | development of leukocytes                | 4.83E-21 | Increased | 2.523 | 75  |
| <i>Cell Death and Survival</i>                       | cell viability of lymphocytes            | 1.12E-11 | Increased | 2.497 | 27  |
| <i>Cell-To-Cell Signaling and Interaction</i>        | activation of cells                      | 1.83E-15 | Increased | 2.433 | 86  |
| <i>Organismal Injury and Abnormalities</i>           | lymphatic node tumor                     | 1.96E-08 | Increased | 2.424 | 48  |
| <i>Cell-To-Cell Signaling and Interaction</i>        | activation of mononuclear leukocytes     | 1.58E-14 | Increased | 2.381 | 53  |
| <i>Cell Death and Survival</i>                       | cell viability of blood cells            | 1.33E-12 | Increased | 2.326 | 36  |
| <i>Hematological System Development and Function</i> | development of mononuclear leukocytes    | 5.97E-22 | Increased | 2.261 | 73  |
| <i>Hematological System Development and Function</i> | development of antigen presenting cells  | 4.62E-06 | Increased | 2.243 | 13  |
| <i>Organismal Injury and Abnormalities</i>           | non-Hodgkin's disease                    | 6.92E-08 | Increased | 2.242 | 45  |
| <i>Cell Death and Survival</i>                       | cell viability of leukocytes             | 1.91E-13 | Increased | 2.209 | 35  |
| <i>Cell Death and Survival</i>                       | cell viability                           | 2.68E-09 | Increased | 2.205 | 88  |
| <i>Cell-To-Cell Signaling and Interaction</i>        | activation of lymphocytes                | 2.88E-14 | Increased | 2.164 | 51  |
| <i>Organismal Injury and Abnormalities</i>           | malignant solid tumor                    | 8.70E-14 | Increased | 2.15  | 485 |
| <i>Cell-To-Cell Signaling and Interaction</i>        | activation of T lymphocytes              | 1.27E-09 | Increased | 2.127 | 36  |
| <i>Post-Translational Modification</i>               | phosphorylation of protein               | 6.19E-10 | Increased | 2.101 | 58  |
| <i>Hematological System Development and Function</i> | development of lymphocytes               | 1.44E-21 | Increased | 2.079 | 72  |
| <i>Cell Death and Survival</i>                       | cell viability of T lymphocytes          | 4.24E-11 | Increased | 2.07  | 20  |
| <i>Hematological System Development and</i>          | quantity of bone marrow cells            | 4.78E-09 | Increased | 2.052 | 22  |



|                                                      |                                   |          |           |        |     |
|------------------------------------------------------|-----------------------------------|----------|-----------|--------|-----|
| <i>Function</i>                                      |                                   |          |           |        |     |
| <i>Hematological System Development and Function</i> | development of bone marrow        | 1.09E-06 | Increased | 2.05   | 18  |
| <i>Cellular Function and Maintenance</i>             | homeostasis of leukocytes         | 1.07E-21 | Increased | 2.041  | 72  |
| <i>Cellular Function and Maintenance</i>             | Lymphocyte homeostasis            | 3.12E-20 | Increased | 2.033  | 69  |
| <i>Hematological System Development and Function</i> | development of phagocytes         | 1.61E-06 | Increased | 2.033  | 15  |
| <i>Cellular Growth and Proliferation</i>             | proliferation of blood cells      | 1.54E-22 | Increased | 2.015  | 92  |
| <i>Cellular Function and Maintenance</i>             | cellular homeostasis              | 2.82E-14 | Increased | 2.011  | 114 |
| <i>Cellular Growth and Proliferation</i>             | proliferation of epithelial cells | 2.33E-08 | Increased | 2.008  | 42  |
| <i>Cellular Function and Maintenance</i>             | function of phagocytes            | 3.50E-11 | Increased | 2      | 35  |
| <i>Infectious Diseases</i>                           | infection of mammalia             | 4.63E-14 | Decreased | -2.393 | 42  |
| <i>Infectious Diseases</i>                           | Bacterial Infections              | 4.81E-10 | Decreased | -2.857 | 40  |
| <i>Organismal Survival</i>                           | organismal death                  | 1.15E-07 | Decreased | -3.005 | 133 |
| <i>Organismal Survival</i>                           | morbidity or mortality            | 2.57E-08 | Decreased | -3.14  | 137 |

**WT cells stimulated with IL-7 (Overnight)**

|                                                      |                                         |          |           |        |     |
|------------------------------------------------------|-----------------------------------------|----------|-----------|--------|-----|
| <i>Organismal Survival</i>                           | organismal death                        | 1.30E-14 | Increased | 8.235  | 495 |
| <i>Organismal Survival</i>                           | morbidity or mortality                  | 1.17E-14 | Increased | 7.756  | 501 |
| <i>Inflammatory Response</i>                         | inflammation of body cavity             | 4.66E-08 | Increased | 3.03   | 169 |
| <i>Cell Death and Survival</i>                       | apoptosis                               | 1.63E-19 | Increased | 2.758  | 563 |
| <i>Inflammatory Response</i>                         | inflammation of organ                   | 1.80E-10 | Increased | 2.741  | 268 |
| <i>Inflammatory Response</i>                         | inflammation of secretory structure     | 3.41E-06 | Increased | 2.521  | 41  |
| <i>Inflammatory Response</i>                         | inflammation of body region             | 6.44E-13 | Increased | 2.399  | 243 |
| <i>Hematological System Development and Function</i> | quantity of memory T lymphocytes        | 1.64E-08 | Increased | 2.329  | 25  |
| <i>Infectious Diseases</i>                           | Viral Infection                         | 3.41E-08 | Decreased | -2.023 | 320 |
| <i>Cellular Growth and Proliferation</i>             | proliferation of mononuclear leukocytes | 1.82E-21 | Decreased | -2.025 | 209 |
| <i>Cellular Growth and Proliferation</i>             | growth of neurites                      | 3.87E-06 | Decreased | -2.034 | 100 |
| <i>Gene Expression</i>                               | activation of DNA endogenous promoter   | 2.85E-14 | Decreased | -2.061 | 274 |
| <i>Cellular Assembly and Organization</i>            | organization of cytoplasm               | 4.89E-07 | Decreased | -2.086 | 302 |
| <i>Cellular Assembly and Organization</i>            | organization of cytoskeleton            | 3.85E-06 | Decreased | -2.086 | 272 |
| <i>Hematological System Development and Function</i> | differentiation of helper T lymphocytes | 2.01E-09 | Decreased | -2.1   | 55  |
| <i>Hematological System Development and Function</i> | differentiation of blood cells          | 1.91E-20 | Decreased | -2.11  | 227 |
| <i>Inflammatory Response</i>                         | immune response of cells                | 5.14E-08 | Decreased | -2.119 | 129 |
| <i>Gene Expression</i>                               | transcription                           | 1.62E-17 | Decreased | -2.121 | 447 |
| <i>Cellular Movement</i>                             | cell movement of leukocytes             | 9.34E-10 | Decreased | -2.123 | 175 |
| <i>Hematological System Development and Function</i> | differentiation of leukocytes           | 9.39E-17 | Decreased | -2.259 | 180 |
| <i>Cellular Movement</i>                             | recruitment of leukocytes               | 2.35E-08 | Decreased | -2.271 | 81  |
| <i>Hematological System Development and Function</i> | differentiation of T lymphocytes        | 3.60E-13 | Decreased | -2.287 | 106 |
| <i>Hematological System Development and Function</i> | T cell development                      | 4.64E-18 | Decreased | -2.296 | 153 |
| <i>Cellular Growth and Proliferation</i>             | proliferation of neuronal cells         | 4.44E-06 | Decreased | -2.307 | 121 |
| <i>Cellular Growth and Proliferation</i>             | cytostasis                              | 2.14E-07 | Decreased | -2.307 | 69  |
| <i>Hematological System Development and Function</i> | T cell homeostasis                      | 5.72E-19 | Decreased | -2.309 | 158 |
| <i>Cellular Movement</i>                             | recruitment of phagocytes               | 1.26E-05 | Decreased | -2.323 | 57  |
| <i>Hematological System Development and Function</i> | differentiation of lymphocytes          | 2.18E-16 | Decreased | -2.383 | 141 |
| <i>Lymphoid Tissue Structure and Development</i>     | formation of lymphatic system component | 1.74E-07 | Decreased | -2.492 | 73  |
| <i>Cellular Movement</i>                             | recruitment of cells                    | 3.66E-09 | Decreased | -2.516 | 90  |
| <i>Cellular Movement</i>                             | leukocyte migration                     | 1.93E-12 | Decreased | -2.544 | 206 |

|                                                      |                                           |          |           |        |     |
|------------------------------------------------------|-------------------------------------------|----------|-----------|--------|-----|
| <i>Cellular Function and Maintenance</i>             | homeostasis of leukocytes                 | 2.96E-19 | Decreased | -2.564 | 167 |
| <i>Cellular Function and Maintenance</i>             | Lymphocyte homeostasis                    | 2.54E-19 | Decreased | -2.572 | 165 |
| <i>Cellular Movement</i>                             | recruitment of blood cells                | 2.32E-09 | Decreased | -2.594 | 85  |
| <i>Cellular Function and Maintenance</i>             | homeostasis of blood cells                | 8.74E-20 | Decreased | -2.633 | 169 |
| <i>Cellular Movement</i>                             | recruitment of granulocytes               | 6.94E-06 | Decreased | -2.649 | 51  |
| <i>Hematological System Development and Function</i> | differentiation of mononuclear leukocytes | 1.95E-16 | Decreased | -2.676 | 151 |
| <i>Cellular Movement</i>                             | recruitment of myeloid cells              | 2.24E-06 | Decreased | -2.683 | 55  |
| <i>Hematological System Development and Function</i> | development of leukocytes                 | 1.01E-18 | Decreased | -2.76  | 178 |
| <i>Hematological System Development and Function</i> | development of blood cells                | 1.42E-19 | Decreased | -2.765 | 198 |
| <i>Cellular Growth and Proliferation</i>             | cytostasis of tumor cell lines            | 1.17E-05 | Decreased | -2.791 | 39  |
| <i>Hematological System Development and Function</i> | development of mononuclear leukocytes     | 2.62E-19 | Decreased | -2.8   | 169 |
| <i>Cellular Movement</i>                             | migration of cells                        | 9.64E-14 | Decreased | -2.804 | 405 |
| <i>Hematological System Development and Function</i> | development of lymphocytes                | 5.10E-19 | Decreased | -2.81  | 167 |
| <i>Cellular Growth and Proliferation</i>             | generation of cells                       | 5.63E-17 | Decreased | -2.817 | 442 |
| <i>Cell Death and Survival</i>                       | cell viability of tumor cell lines        | 9.45E-10 | Decreased | -2.83  | 177 |
| <i>Lipid Metabolism</i>                              | synthesis of lipid                        | 2.45E-06 | Decreased | -2.831 | 148 |
| <i>Cell Death and Survival</i>                       | cell viability of leukocytes              | 1.22E-09 | Decreased | -2.948 | 70  |
| <i>Inflammatory Response</i>                         | immune response of leukocytes             | 4.66E-07 | Decreased | -3     | 73  |
| <i>Cellular Movement</i>                             | cell movement                             | 7.97E-15 | Decreased | -3.058 | 451 |
| <i>Cell Death and Survival</i>                       | cell viability of blood cells             | 7.94E-09 | Decreased | -3.148 | 74  |
| <i>Organismal Survival</i>                           | survival of organism                      | 8.98E-12 | Decreased | -3.156 | 169 |
| <i>Inflammatory Response</i>                         | antibody response                         | 3.66E-07 | Decreased | -3.195 | 44  |
| <i>Cellular Growth and Proliferation</i>             | proliferation of cells                    | 6.90E-33 | Decreased | -3.443 | 809 |
| <i>Cellular Function and Maintenance</i>             | cellular homeostasis                      | 6.62E-17 | Decreased | -3.941 | 352 |
| <i>Cell Death and Survival</i>                       | cell viability                            | 1.69E-14 | Decreased | -4.434 | 296 |
| <i>Cell Death and Survival</i>                       | cell survival                             | 2.27E-16 | Decreased | -4.875 | 321 |

**STAT1 Tg cells stimulated with IL-7 (Overnight)**

|                                                      |                                          |          |           |        |     |
|------------------------------------------------------|------------------------------------------|----------|-----------|--------|-----|
| <i>Organismal Survival</i>                           | organismal death                         | 4.70E-16 | Increased | 9.282  | 550 |
| <i>Organismal Survival</i>                           | morbidity or mortality                   | 5.64E-16 | Increased | 8.765  | 556 |
| <i>Inflammatory Response</i>                         | inflammation of body cavity              | 3.28E-08 | Increased | 3.094  | 185 |
| <i>Hematological System Development and Function</i> | quantity of memory T lymphocytes         | 3.08E-08 | Increased | 2.845  | 26  |
| <i>Cell Death and Survival</i>                       | apoptosis                                | 2.39E-20 | Increased | 2.507  | 620 |
| <i>Inflammatory Disease</i>                          | chronic inflammatory disorder            | 2.79E-07 | Increased | 2.475  | 220 |
| <i>Inflammatory Response</i>                         | inflammation of organ                    | 2.95E-13 | Increased | 2.389  | 306 |
| <i>Organismal Injury and Abnormalities</i>           | lymphocytic cancer                       | 4.34E-09 | Increased | 2.092  | 176 |
| <i>Inflammatory Response</i>                         | inflammation of secretory structure      | 5.74E-07 | Increased | 2.059  | 46  |
| <i>Organismal Injury and Abnormalities</i>           | lymphoreticular neoplasm                 | 3.49E-09 | Increased | 2.047  | 177 |
| <i>Inflammatory Response</i>                         | inflammation of body region              | 5.34E-15 | Increased | 2.043  | 273 |
| <i>Organismal Injury and Abnormalities</i>           | hyperplasia of lymphocytes               | 8.51E-07 | Increased | 2.01   | 17  |
| <i>Inflammatory Response</i>                         | antibody response                        | 8.08E-09 | Decreased | -2.006 | 51  |
| <i>Cell Death and Survival</i>                       | cell viability of mononuclear leukocytes | 1.41E-08 | Decreased | -2.008 | 58  |
| <i>DNA Replication, Recombination, and Repair</i>    | repair of DNA                            | 9.89E-08 | Decreased | -2.012 | 77  |
| <i>Gene Expression</i>                               | expression of RNA                        | 1.86E-19 | Decreased | -2.017 | 527 |
| <i>Hematological System Development and Function</i> | quantity of phagocytes                   | 2.93E-13 | Decreased | -2.03  | 124 |
| <i>Cell Death and Survival</i>                       | cell viability of lymphocytes            | 1.41E-08 | Decreased | -2.035 | 56  |
| <i>Cell Cycle</i>                                    | G1 phase                                 | 1.02E-07 | Decreased | -2.06  | 99  |
| <i>Gene Expression</i>                               | transactivation                          | 8.14E-14 | Decreased | -2.068 | 162 |

|                                                      |                                           |          |           |        |     |
|------------------------------------------------------|-------------------------------------------|----------|-----------|--------|-----|
| <i>Humoral Immune Response</i>                       | class switching                           | 9.82E-10 | Decreased | -2.069 | 34  |
| <i>Cell Death and Survival</i>                       | cell viability of T lymphocytes           | 5.26E-09 | Decreased | -2.116 | 39  |
| <i>Cellular Growth and Proliferation</i>             | colony formation                          | 8.33E-08 | Decreased | -2.121 | 132 |
| <i>Cancer</i>                                        | cell transformation                       | 1.88E-11 | Decreased | -2.126 | 127 |
| <i>Cellular Movement</i>                             | cell movement of leukocytes               | 4.18E-11 | Decreased | -2.14  | 196 |
| <i>Hematological System Development and Function</i> | differentiation of B lymphocytes          | 1.12E-07 | Decreased | -2.142 | 61  |
| <i>Cellular Movement</i>                             | leukocyte migration                       | 3.12E-13 | Decreased | -2.186 | 227 |
| <i>Cell Death and Survival</i>                       | cell viability of phagocytes              | 3.21E-07 | Decreased | -2.214 | 34  |
| <i>Gene Expression</i>                               | transcription of RNA                      | 1.02E-20 | Decreased | -2.262 | 461 |
| <i>Hematological System Development and Function</i> | development of hematopoietic system       | 1.42E-09 | Decreased | -2.285 | 83  |
| <i>Cellular Growth and Proliferation</i>             | cell proliferation of tumor cell lines    | 2.92E-14 | Decreased | -2.397 | 373 |
| <i>Cellular Growth and Proliferation</i>             | colony formation of cells                 | 2.85E-07 | Decreased | -2.411 | 120 |
| <i>Cellular Growth and Proliferation</i>             | cytostasis of tumor cell lines            | 1.90E-06 | Decreased | -2.414 | 44  |
| <i>Hematological System Development and Function</i> | differentiation of leukocytes             | 2.75E-16 | Decreased | -2.43  | 193 |
| <i>Hematological System Development and Function</i> | differentiation of helper T lymphocytes   | 4.85E-09 | Decreased | -2.44  | 58  |
| <i>Hematological System Development and Function</i> | development of hematopoietic cells        | 2.93E-06 | Decreased | -2.527 | 58  |
| <i>Hematological System Development and Function</i> | differentiation of blood cells            | 5.12E-20 | Decreased | -2.568 | 244 |
| <i>Cellular Growth and Proliferation</i>             | cell proliferation of breast cell lines   | 5.64E-12 | Decreased | -2.571 | 48  |
| <i>Lipid Metabolism</i>                              | synthesis of fatty acid                   | 2.67E-06 | Decreased | -2.58  | 77  |
| <i>Hematological System Development and Function</i> | development of follicular T helper cells  | 8.36E-07 | Decreased | -2.6   | 9   |
| <i>Organismal Injury and Abnormalities</i>           | growth of tumor                           | 1.68E-08 | Decreased | -2.612 | 190 |
| <i>Hematological System Development and Function</i> | differentiation of T lymphocytes          | 2.61E-14 | Decreased | -2.641 | 117 |
| <i>Inflammatory Response</i>                         | immune response of cells                  | 5.21E-10 | Decreased | -2.667 | 148 |
| <i>Gene Expression</i>                               | transcription                             | 2.10E-19 | Decreased | -2.731 | 497 |
| <i>Hematological System Development and Function</i> | differentiation of lymphocytes            | 1.38E-17 | Decreased | -2.747 | 155 |
| <i>Cell Death and Survival</i>                       | self-renewal of cells                     | 1.94E-06 | Decreased | -2.764 | 36  |
| <i>Hematological System Development and Function</i> | T cell development                        | 2.68E-21 | Decreased | -2.784 | 173 |
| <i>Hematological System Development and Function</i> | T cell homeostasis                        | 4.11E-22 | Decreased | -2.793 | 178 |
| <i>Cellular Growth and Proliferation</i>             | growth of neurites                        | 1.79E-08 | Decreased | -2.804 | 118 |
| <i>Infectious Diseases</i>                           | Viral Infection                           | 3.51E-10 | Decreased | -2.853 | 363 |
| <i>Lymphoid Tissue Structure and Development</i>     | formation of lymphatic system component   | 2.74E-10 | Decreased | -2.963 | 87  |
| <i>Cell-To-Cell Signaling and Interaction</i>        | immune response of leukocytes             | 1.11E-08 | Decreased | -2.968 | 84  |
| <i>Cellular Function and Maintenance</i>             | homeostasis of leukocytes                 | 2.10E-22 | Decreased | -3.059 | 188 |
| <i>Cellular Function and Maintenance</i>             | Lymphocyte homeostasis                    | 1.40E-22 | Decreased | -3.066 | 186 |
| <i>Hematological System Development and Function</i> | differentiation of mononuclear leukocytes | 1.30E-17 | Decreased | -3.069 | 166 |
| <i>Cell Death and Survival</i>                       | cell viability of leukocytes              | 6.04E-10 | Decreased | -3.072 | 76  |
| <i>Cellular Growth and Proliferation</i>             | proliferation of neuronal cells           | 6.31E-10 | Decreased | -3.079 | 148 |
| <i>Hematological System Development and Function</i> | development of leukocytes                 | 2.03E-22 | Decreased | -3.091 | 202 |
| <i>Cellular Assembly and Organization</i>            | outgrowth of neurites                     | 2.85E-07 | Decreased | -3.096 | 101 |
| <i>Hematological System Development and Function</i> | development of mononuclear leukocytes     | 9.10E-23 | Decreased | -3.135 | 191 |
| <i>Hematological System Development and Function</i> | development of lymphocytes                | 1.59E-22 | Decreased | -3.145 | 189 |
| <i>Cellular Function and Maintenance</i>             | homeostasis of blood cells                | 6.34E-23 | Decreased | -3.186 | 190 |
| <i>Hematological System Development and Function</i> | development of blood cells                | 7.28E-23 | Decreased | -3.229 | 223 |
| <i>Cellular Movement</i>                             | invasion of cells                         | 6.03E-07 | Decreased | -3.266 | 198 |

|                                          |                                    |          |           |        |     |
|------------------------------------------|------------------------------------|----------|-----------|--------|-----|
| <i>Cellular Growth and Proliferation</i> | outgrowth of cells                 | 5.78E-07 | Decreased | -3.352 | 106 |
| <i>Cellular Growth and Proliferation</i> | generation of cells                | 1.38E-19 | Decreased | -3.544 | 495 |
| <i>Cell Death and Survival</i>           | cell viability of blood cells      | 5.09E-10 | Decreased | -3.558 | 83  |
| <i>Cellular Growth and Proliferation</i> | proliferation of cells             | 1.92E-34 | Decreased | -3.745 | 891 |
| <i>Cellular Function and Maintenance</i> | cellular homeostasis               | 2.09E-15 | Decreased | -3.795 | 377 |
| <i>Cellular Movement</i>                 | migration of cells                 | 9.15E-17 | Decreased | -3.893 | 458 |
| <i>Organismal Survival</i>               | survival of organism               | 1.12E-11 | Decreased | -3.958 | 183 |
| <i>Cell Death and Survival</i>           | cell viability of tumor cell lines | 4.68E-12 | Decreased | -4.01  | 202 |
| <i>Cellular Movement</i>                 | cell movement                      | 4.24E-17 | Decreased | -4.252 | 505 |
| <i>Cell Death and Survival</i>           | cell viability                     | 5.00E-16 | Decreased | -5.606 | 329 |
| <i>Cell Death and Survival</i>           | cell survival                      | 3.54E-18 | Decreased | -6.272 | 357 |

Lists of DEGs. their  $\log_2(\text{FC})$  and adjusted  $p$  values were generated for WT and STAT1 Tg CD4 T cells stimulated for 90 minutes or overnight with rmIL-7 and used as input in IPA software. \*The  $p$ -value was calculated with the Fischer's exact test and reflects the likelihood that the association between a set of genes in dataset and a related biological function is significant. °A positive or negative z-score value indicates that a function is predicted to be increased or decreased in T cells stimulated with IL-7. ¤Number of RNAs differentially expressed in the disease and functions category.

**Table S9. Primer sequences**

| <b>Genes</b>  | <b>Forward</b>          | <b>Reverse</b>         |
|---------------|-------------------------|------------------------|
| <i>Bcl2</i>   | CCTGGCTGTCTCTGAAGACC    | CTCACTTGTGGCCCAGGTAT   |
| <i>Cish</i>   | CCATGCA GCCCTTACCCAC    | GTACCACCCAGATTCCCGAAG  |
| <i>Cxcl10</i> | TGCGAGCCTATCCTGCCCACGTG | CCGGGGTGTGTGCGTGGCTTCA |
| <i>Ifit1</i>  | ACCATGGGAGAGAATGCTGAT   | GCCAGGAGGTTGTGC        |
| <i>Socs1</i>  | TTCTTGGTGC GCGACAGTC    | AAGCCATCTTCACGCTGAGC   |
| <i>Bik</i>    | GTCGGAGG CGAGACTTATGG   | GTTTCTGCCTTCCACGCACT   |
| <i>Ifi27</i>  | TAGCTGC TGTACCACCTGCG   | CAGCTCCAGCAGACTGCAGAA  |
| <i>Socs2</i>  | CTGCGGATTGAGTACCAAGAT   | CCTTGCACATCTGGACATAGT  |
| <i>Hprt</i>   | GCGATGATGAACCAGGTTATGA  | ACAATGTGATGGCCTCCCAT   |
